# Supplementary material for: Combined analyses of transcriptome and metabolome reveal the mechanism of exogenous strigolactone regulating the response of elephant grass to drought stress
Source: Front Plant Sci. 2023 May 8;14:1186718. doi: 10.3389/fpls.2023.1186718 (PMC10200884; doi:10.3389/fpls.2023.1186718)
Supplement: Supplementary File 1 — A total of 22 hormones metabolites. [file DataSheet_1.xlsx]

## Sheet: Sheet1
	leaf			root
	LCK	LD	LSL	RCK	RD	RSL
Gibberellin	0	0	0	0.000184991	0.000152292	7.58929e-05
Abscisic acid	0.00080147	0.00269086	0.00297059	0.0016161	0.0085555	0.0112863
salicylic acid	1.40869	1.48672	1.31288	0.117013	0.316177	0.297765
Methyl salicylate	0.000337692	0.00345644	0.00339731	0.00909071	0.016322	0.0159596
Jasmonic acid	0.000841959	0.00724393	0.0175406	0.0191744	0.0521027	0.0230356
Brassinolide	0	0	0	0	0	0
Paclobutrazol	0	0	0	0	0	0
Trans-zeatin Riboside	0.0126624	0.00880545	0.010728	0.00781654	0.00533058	0.00660809
N6 isopentenyladenine	1.15724e-05	8.88709e-06	1.32708e-05	8.59088e-06	2.13552e-05	1.94229e-05
α- Naphthylacetic acid	0	0.0355081	0.0287988	0.0161704	0.0347752	0.0298508
6-Kinetin	0	0	0	0	0	0
Phenol	0	0	0	0	0	0
Melatonin	0	0	0	0	0	0
Methyl jasmonate	0.000152396	0.000444854	0.000792965	0	0	0
Dihydrozeatin	0	0	0	0	0	0
Strigolactone	0	0	0.00758432	0	0	0
6-Benzylaminopurine	1.1175e-05	6.56788e-06	1.15476e-05	5.96794e-06	2.32628e-06	1.64017e-06
Positive and negative zeatin	2.93853e-05	1.36798e-05	9.71614e-06	9.8446e-07	3.48689e-06	1.86401e-06
3-Indolepropionic acid	0	0	0	0	0	0
1-Amino-cyclopropane carboxylic acid	0	0	0	0	0	0
Indole acetic acid	0.000339579	0.000460161	0.000864916	0.00462847	0.00365785	0.00392235
Indole butyric acid	0	0	0	0	0	0
