# Supplementary material for: Combined analyses of transcriptome and metabolome reveal the mechanism of exogenous strigolactone regulating the response of elephant grass to drought stress
Source: Front Plant Sci. 2023 May 8;14:1186718. doi: 10.3389/fpls.2023.1186718 (PMC10200884; doi:10.3389/fpls.2023.1186718)
Supplement: Supplementary File 2 — TF analysis results. [file DataSheet_2.xlsx]

## Sheet: Transcription Factors
TF family	Gene number
bHLH	349
MYB	345
ERF	292
NAC	289
MYB_related	240
B3	220
HB-other	192
WRKY	174
bZIP	164
GRAS	161
LBD (AS2/LOB)	75
Dof	66
GATA	63
C3H	61
AP2	54
C2H2	51
FAR1	50
ARF	47
HD-ZIP	40
TCP	39
M_type	38
SBP	37
Nin-like	36
ZF-HD	35
DBB	33
GeBP	25
E2F/DP	24
NF-YA	24
YABBY	21
GRF	20
CPP	18
CAMTA	17
LSD	17
SRS	17
EIL	14
TALE	14
BES1	13
CO-like	13
BBR-BPC	9
HB-PHD	6
NF-X1	6
HSF	4
RAV	4
Whirly	4
LFY	3
MIKC	2
S1Fa-like	2
