# Supplementary material for: Combined analyses of transcriptome and metabolome reveal the mechanism of exogenous strigolactone regulating the response of elephant grass to drought stress
Source: Front Plant Sci. 2023 May 8;14:1186718. doi: 10.3389/fpls.2023.1186718 (PMC10200884; doi:10.3389/fpls.2023.1186718)
Supplement: Supplementary File 3 — The genes identified in the eight key modules. [file DataSheet_3.xlsx]

## Sheet: blue
gene id
gene.Cp0000172.1
gene.Cp0000182.1
gene.Cp0000306.1
gene.Cp0000423.1
gene.Cp0000623.1
gene.Cp0000704.1
gene.Cp0000786.1
gene.Cp0000845.1
gene.Cp0000854.1
gene.Cp0000890.1
gene.Cp0000963.1
gene.Cp0001109.1
gene.Cp0001122.1
gene.Cp0001140.1
gene.Cp0001186.1
gene.Cp0001262.1
gene.Cp0001487.1
gene.Cp0001498.1
gene.Cp0001593.1
gene.Cp0001656.1
gene.Cp0001708.1
gene.Cp0001733.1
gene.CpA0100065.1
gene.CpA0100130.1
gene.CpA0100136.1
gene.CpA0100153.1
gene.CpA0100156.1
gene.CpA0100158.1
gene.CpA0100159.1
gene.CpA0100165.1
gene.CpA0100170.1
gene.CpA0100173.1
gene.CpA0100190.1
gene.CpA0100283.1
gene.CpA0100329.1
gene.CpA0100330.1
gene.CpA0100342.1
gene.CpA0100430.1
gene.CpA0100439.1
gene.CpA0100756.1
gene.CpA0100765.1
gene.CpA0100870.1
gene.CpA0100940.1
gene.CpA0101064.1
gene.CpA0101076.1
gene.CpA0101120.1
gene.CpA0101192.1
gene.CpA0101208.1
gene.CpA0101244.1
gene.CpA0101245.1
gene.CpA0101332.1
gene.CpA0101446.1
gene.CpA0101454.1
gene.CpA0101500.1
gene.CpA0101514.1
gene.CpA0101520.1
gene.CpA0101548.1
gene.CpA0101666.1
gene.CpA0101676.1
gene.CpA0101708.1
gene.CpA0101750.1
gene.CpA0101764.1
gene.CpA0101797.1
gene.CpA0101819.1
gene.CpA0101877.1
gene.CpA0101960.1
gene.CpA0102059.1
gene.CpA0102066.1
gene.CpA0102102.1
gene.CpA0102116.1
gene.CpA0102208.1
gene.CpA0102318.1
gene.CpA0102321.1
gene.CpA0102392.1
gene.CpA0102420.1
gene.CpA0102453.1
gene.CpA0102480.1
gene.CpA0102536.1
gene.CpA0102872.1
gene.CpA0102874.1
gene.CpA0102875.1
gene.CpA0102926.1
gene.CpA0102935.1
gene.CpA0102963.1
gene.CpA0102969.1
gene.CpA0102972.1
gene.CpA0102975.1
gene.CpA0102989.1
gene.CpA0103032.1
gene.CpA0103034.1
gene.CpA0103054.1
gene.CpA0103055.1
gene.CpA0103093.1
gene.CpA0103128.1
gene.CpA0103141.1
gene.CpA0103149.1
gene.CpA0103176.1
gene.CpA0103238.1
gene.CpA0103312.1
gene.CpA0103359.1
gene.CpA0103434.1
gene.CpA0103439.1
gene.CpA0103472.1
gene.CpA0103530.1
gene.CpA0103564.1
gene.CpA0103601.1
gene.CpA0103719.1
gene.CpA0103736.1
gene.CpA0103743.1
gene.CpA0103744.1
gene.CpA0103877.1
gene.CpA0103975.1
gene.CpA0103991.1
gene.CpA0104019.1
gene.CpA0104043.1
gene.CpA0104091.1
gene.CpA0104094.1
gene.CpA0104139.1
gene.CpA0104258.1
gene.CpA0104259.1
gene.CpA0104294.1
gene.CpA0104320.1
gene.CpA0104392.1
gene.CpA0104436.1
gene.CpA0104618.1
gene.CpA0104791.1
gene.CpA0104792.1
gene.CpA0104837.1
gene.CpA0104919.1
gene.CpA0104922.1
gene.CpA0105247.1
gene.CpA0105252.1
gene.CpA0105255.1
gene.CpA0105278.1
gene.CpA0105385.1
gene.CpA0105394.1
gene.CpA0105623.1
gene.CpA0105640.1
gene.CpA0105707.1
gene.CpA0105736.1
gene.CpA0105766.1
gene.CpA0200035.1
gene.CpA0200054.1
gene.CpA0200071.1
gene.CpA0200096.1
gene.CpA0200144.1
gene.CpA0200171.1
gene.CpA0200222.1
gene.CpA0200418.1
gene.CpA0200419.1
gene.CpA0200445.1
gene.CpA0200530.1
gene.CpA0200577.1
gene.CpA0200579.1
gene.CpA0200660.1
gene.CpA0200687.1
gene.CpA0200911.1
gene.CpA0201269.1
gene.CpA0201434.1
gene.CpA0201578.1
gene.CpA0201680.1
gene.CpA0201685.1
gene.CpA0201690.1
gene.CpA0201713.1
gene.CpA0201721.1
gene.CpA0201802.1
gene.CpA0201959.1
gene.CpA0201971.1
gene.CpA0201992.1
gene.CpA0202044.1
gene.CpA0202047.1
gene.CpA0202049.1
gene.CpA0202080.1
gene.CpA0202201.1
gene.CpA0202221.1
gene.CpA0202247.1
gene.CpA0202306.1
gene.CpA0202342.1
gene.CpA0202423.1
gene.CpA0202599.1
gene.CpA0202622.1
gene.CpA0202666.1
gene.CpA0202953.1
gene.CpA0202979.1
gene.CpA0202990.1
gene.CpA0202992.1
gene.CpA0203000.1
gene.CpA0203030.1
gene.CpA0203085.1
gene.CpA0203117.1
gene.CpA0203178.1
gene.CpA0203288.1
gene.CpA0203298.1
gene.CpA0203334.1
gene.CpA0203368.1
gene.CpA0203372.1
gene.CpA0203392.1
gene.CpA0203395.1
gene.CpA0203441.1
gene.CpA0203568.1
gene.CpA0203632.1
gene.CpA0203640.1
gene.CpA0203744.1
gene.CpA0203766.1
gene.CpA0204059.1
gene.CpA0204162.1
gene.CpA0204208.1
gene.CpA0204209.1
gene.CpA0204211.1
gene.CpA0204222.1
gene.CpA0204291.1
gene.CpA0204306.1
gene.CpA0204337.1
gene.CpA0204341.1
gene.CpA0204412.1
gene.CpA0204498.1
gene.CpA0204601.1
gene.CpA0204608.1
gene.CpA0204666.1
gene.CpA0204708.1
gene.CpA0204823.1
gene.CpA0300189.1
gene.CpA0300265.1
gene.CpA0300412.1
gene.CpA0300483.1
gene.CpA0300733.1
gene.CpA0300750.1
gene.CpA0300772.1
gene.CpA0300832.1
gene.CpA0300971.1
gene.CpA0301008.1
gene.CpA0301033.1
gene.CpA0301042.1
gene.CpA0301051.1
gene.CpA0301052.1
gene.CpA0301053.1
gene.CpA0301064.1
gene.CpA0301133.1
gene.CpA0301145.1
gene.CpA0301159.1
gene.CpA0301276.1
gene.CpA0301334.1
gene.CpA0301360.1
gene.CpA0301409.1
gene.CpA0301653.1
gene.CpA0301758.1
gene.CpA0301794.1
gene.CpA0301844.1
gene.CpA0301845.1
gene.CpA0301861.1
gene.CpA0301866.1
gene.CpA0301941.1
gene.CpA0301945.1
gene.CpA0302222.1
gene.CpA0302338.1
gene.CpA0302398.1
gene.CpA0302464.1
gene.CpA0302500.1
gene.CpA0302720.1
gene.CpA0302762.1
gene.CpA0302793.1
gene.CpA0302794.1
gene.CpA0302795.1
gene.CpA0302821.1
gene.CpA0302860.1
gene.CpA0302924.1
gene.CpA0302996.1
gene.CpA0303253.1
gene.CpA0303309.1
gene.CpA0303358.1
gene.CpA0303396.1
gene.CpA0303413.1
gene.CpA0303505.1
gene.CpA0303639.1
gene.CpA0303645.1
gene.CpA0303649.1
gene.CpA0303663.1
gene.CpA0303752.1
gene.CpA0303909.1
gene.CpA0304005.1
gene.CpA0304067.1
gene.CpA0304086.1
gene.CpA0304225.1
gene.CpA0304236.1
gene.CpA0400128.1
gene.CpA0400136.1
gene.CpA0400179.1
gene.CpA0400213.1
gene.CpA0400228.1
gene.CpA0400388.1
gene.CpA0400419.1
gene.CpA0400438.1
gene.CpA0400492.1
gene.CpA0400493.1
gene.CpA0400668.1
gene.CpA0400752.1
gene.CpA0400773.1
gene.CpA0400941.1
gene.CpA0400950.1
gene.CpA0400989.1
gene.CpA0401037.1
gene.CpA0401059.1
gene.CpA0401178.1
gene.CpA0401180.1
gene.CpA0401182.1
gene.CpA0401291.1
gene.CpA0401304.1
gene.CpA0401310.1
gene.CpA0401315.1
gene.CpA0401340.1
gene.CpA0401427.1
gene.CpA0401434.1
gene.CpA0401437.1
gene.CpA0401449.1
gene.CpA0401453.1
gene.CpA0401456.1
gene.CpA0401524.1
gene.CpA0401569.1
gene.CpA0401594.1
gene.CpA0401625.1
gene.CpA0401695.1
gene.CpA0401730.1
gene.CpA0401738.1
gene.CpA0401858.1
gene.CpA0401891.1
gene.CpA0401924.1
gene.CpA0402024.1
gene.CpA0402031.1
gene.CpA0402261.1
gene.CpA0402280.1
gene.CpA0402293.1
gene.CpA0402311.1
gene.CpA0402353.1
gene.CpA0402477.1
gene.CpA0402495.1
gene.CpA0402509.1
gene.CpA0402514.1
gene.CpA0402674.1
gene.CpA0402850.1
gene.CpA0402999.1
gene.CpA0403035.1
gene.CpA0403281.1
gene.CpA0403295.1
gene.CpA0403357.1
gene.CpA0403388.1
gene.CpA0403497.1
gene.CpA0403509.1
gene.CpA0403580.1
gene.CpA0403667.1
gene.CpA0403712.1
gene.CpA0403721.1
gene.CpA0403769.1
gene.CpA0403810.1
gene.CpA0403851.1
gene.CpA0403863.1
gene.CpA0403946.1
gene.CpA0403970.1
gene.CpA0403987.1
gene.CpA0404132.1
gene.CpA0404148.1
gene.CpA0404485.1
gene.CpA0404543.1
gene.CpA0404702.1
gene.CpA0404884.1
gene.CpA0404949.1
gene.CpA0405043.1
gene.CpA0405048.1
gene.CpA0405111.1
gene.CpA0405184.1
gene.CpA0405195.1
gene.CpA0405221.1
gene.CpA0405276.1
gene.CpA0405300.1
gene.CpA0405382.1
gene.CpA0405396.1
gene.CpA0405435.1
gene.CpA0405587.1
gene.CpA0405631.1
gene.CpA0405689.1
gene.CpA0405740.1
gene.CpA0405744.1
gene.CpA0405747.1
gene.CpA0405776.1
gene.CpA0405783.1
gene.CpA0405790.1
gene.CpA0500040.1
gene.CpA0500041.1
gene.CpA0500111.1
gene.CpA0500171.1
gene.CpA0500240.1
gene.CpA0500327.1
gene.CpA0500361.1
gene.CpA0500413.1
gene.CpA0500469.1
gene.CpA0500518.1
gene.CpA0500592.1
gene.CpA0500626.1
gene.CpA0500690.1
gene.CpA0500707.1
gene.CpA0500848.1
gene.CpA0500873.1
gene.CpA0500990.1
gene.CpA0501054.1
gene.CpA0501070.1
gene.CpA0501108.1
gene.CpA0501198.1
gene.CpA0501203.1
gene.CpA0501232.1
gene.CpA0501380.1
gene.CpA0501407.1
gene.CpA0501676.1
gene.CpA0501691.1
gene.CpA0501752.1
gene.CpA0501805.1
gene.CpA0501812.1
gene.CpA0501815.1
gene.CpA0501872.1
gene.CpA0501886.1
gene.CpA0502002.1
gene.CpA0502003.1
gene.CpA0502040.1
gene.CpA0502086.1
gene.CpA0502191.1
gene.CpA0502206.1
gene.CpA0502217.1
gene.CpA0502318.1
gene.CpA0502345.1
gene.CpA0502403.1
gene.CpA0502419.1
gene.CpA0502438.1
gene.CpA0502465.1
gene.CpA0502473.1
gene.CpA0502537.1
gene.CpA0502571.1
gene.CpA0502667.1
gene.CpA0502673.1
gene.CpA0502785.1
gene.CpA0502815.1
gene.CpA0502825.1
gene.CpA0502897.1
gene.CpA0502943.1
gene.CpA0503075.1
gene.CpA0503282.1
gene.CpA0503348.1
gene.CpA0503465.1
gene.CpA0503493.1
gene.CpA0503527.1
gene.CpA0503591.1
gene.CpA0503687.1
gene.CpA0503716.1
gene.CpA0503770.1
gene.CpA0503869.1
gene.CpA0503894.1
gene.CpA0503929.1
gene.CpA0504145.1
gene.CpA0504155.1
gene.CpA0504181.1
gene.CpA0504194.1
gene.CpA0504198.1
gene.CpA0504262.1
gene.CpA0504269.1
gene.CpA0504312.1
gene.CpA0504314.1
gene.CpA0504353.1
gene.CpA0504506.1
gene.CpA0504696.1
gene.CpA0504720.1
gene.CpA0504741.1
gene.CpA0504761.1
gene.CpA0504824.1
gene.CpA0504952.1
gene.CpA0504957.1
gene.CpA0504986.1
gene.CpA0504993.1
gene.CpA0505059.1
gene.CpA0505145.1
gene.CpA0505166.1
gene.CpA0505242.1
gene.CpA0505257.1
gene.CpA0505269.1
gene.CpA0505270.1
gene.CpA0600076.1
gene.CpA0600108.1
gene.CpA0600142.1
gene.CpA0600181.1
gene.CpA0600184.1
gene.CpA0600187.1
gene.CpA0600208.1
gene.CpA0600225.1
gene.CpA0600330.1
gene.CpA0600383.1
gene.CpA0600436.1
gene.CpA0600465.1
gene.CpA0600497.1
gene.CpA0600540.1
gene.CpA0600710.1
gene.CpA0600760.1
gene.CpA0600766.1
gene.CpA0601030.1
gene.CpA0601112.1
gene.CpA0601180.1
gene.CpA0601271.1
gene.CpA0601294.1
gene.CpA0601415.1
gene.CpA0601422.1
gene.CpA0601440.1
gene.CpA0601579.1
gene.CpA0601604.1
gene.CpA0601716.1
gene.CpA0601741.1
gene.CpA0601760.1
gene.CpA0601782.1
gene.CpA0601789.1
gene.CpA0601811.1
gene.CpA0601820.1
gene.CpA0601838.1
gene.CpA0601890.1
gene.CpA0601914.1
gene.CpA0602087.1
gene.CpA0602094.1
gene.CpA0602113.1
gene.CpA0602131.1
gene.CpA0602261.1
gene.CpA0602283.1
gene.CpA0602398.1
gene.CpA0602411.1
gene.CpA0602422.1
gene.CpA0602492.1
gene.CpA0602518.1
gene.CpA0602572.1
gene.CpA0602697.1
gene.CpA0602737.1
gene.CpA0602740.1
gene.CpA0602744.1
gene.CpA0602846.1
gene.CpA0602858.1
gene.CpA0602879.1
gene.CpA0602928.1
gene.CpA0603087.1
gene.CpA0603132.1
gene.CpA0603294.1
gene.CpA0603363.1
gene.CpA0603422.1
gene.CpA0603450.1
gene.CpA0603542.1
gene.CpA0603583.1
gene.CpA0603735.1
gene.CpA0603747.1
gene.CpA0603791.1
gene.CpA0603836.1
gene.CpA0603837.1
gene.CpA0603901.1
gene.CpA0603909.1
gene.CpA0603972.1
gene.CpA0604048.1
gene.CpA0700041.1
gene.CpA0700210.1
gene.CpA0700211.1
gene.CpA0700212.1
gene.CpA0700213.1
gene.CpA0700215.1
gene.CpA0700227.1
gene.CpA0700329.1
gene.CpA0700414.1
gene.CpA0700434.1
gene.CpA0700483.1
gene.CpA0700508.1
gene.CpA0700510.1
gene.CpA0700513.1
gene.CpA0700530.1
gene.CpA0700550.1
gene.CpA0700565.1
gene.CpA0700577.1
gene.CpA0700603.1
gene.CpA0700616.1
gene.CpA0700660.1
gene.CpA0700698.1
gene.CpA0700726.1
gene.CpA0700763.1
gene.CpA0700786.1
gene.CpA0700787.1
gene.CpA0700836.1
gene.CpA0700849.1
gene.CpA0700871.1
gene.CpA0700959.1
gene.CpA0700995.1
gene.CpA0701011.1
gene.CpA0701025.1
gene.CpA0701313.1
gene.CpA0701345.1
gene.CpA0701469.1
gene.CpA0701483.1
gene.CpA0701582.1
gene.CpA0701953.1
gene.CpA0701955.1
gene.CpA0701958.1
gene.CpA0702089.1
gene.CpA0702125.1
gene.CpA0702134.1
gene.CpA0702153.1
gene.CpA0702172.1
gene.CpA0702212.1
gene.CpA0702260.1
gene.CpA0702281.1
gene.CpA0702283.1
gene.CpA0702284.1
gene.CpA0702340.1
gene.CpA0702362.1
gene.CpA0702403.1
gene.CpA0702405.1
gene.CpA0702409.1
gene.CpA0702605.1
gene.CpA0702652.1
gene.CpA0702684.1
gene.CpA0702841.1
gene.CpA0702843.1
gene.CpA0702868.1
gene.CpA0702910.1
gene.CpA0702945.1
gene.CpA0703035.1
gene.CpA0703041.1
gene.CpA0703075.1
gene.CpA0703102.1
gene.CpA0703140.1
gene.CpA0703288.1
gene.CpA0703296.1
gene.CpA0703383.1
gene.CpA0703505.1
gene.CpA0703506.1
gene.CpA0703566.1
gene.CpA0703584.1
gene.CpA0703850.1
gene.CpA0703855.1
gene.CpA0703868.1
gene.CpA0703872.1
gene.CpA0703949.1
gene.CpA0704015.1
gene.CpA0704076.1
gene.CpA0704183.1
gene.CpA0704263.1
gene.CpA0704378.1
gene.CpA0704381.1
gene.CpB0100024.1
gene.CpB0100029.1
gene.CpB0100046.1
gene.CpB0100051.1
gene.CpB0100157.1
gene.CpB0100226.1
gene.CpB0100341.1
gene.CpB0100698.1
gene.CpB0100747.1
gene.CpB0100804.1
gene.CpB0100860.1
gene.CpB0100950.1
gene.CpB0100962.1
gene.CpB0100972.1
gene.CpB0101041.1
gene.CpB0101083.1
gene.CpB0101128.1
gene.CpB0101134.1
gene.CpB0101177.1
gene.CpB0101478.1
gene.CpB0101557.1
gene.CpB0101622.1
gene.CpB0101663.1
gene.CpB0101761.1
gene.CpB0101931.1
gene.CpB0102073.1
gene.CpB0102124.1
gene.CpB0102125.1
gene.CpB0102163.1
gene.CpB0102182.1
gene.CpB0102279.1
gene.CpB0102283.1
gene.CpB0102485.1
gene.CpB0102495.1
gene.CpB0102552.1
gene.CpB0102564.1
gene.CpB0102665.1
gene.CpB0102722.1
gene.CpB0102819.1
gene.CpB0102905.1
gene.CpB0102955.1
gene.CpB0102961.1
gene.CpB0102996.1
gene.CpB0103040.1
gene.CpB0103048.1
gene.CpB0103054.1
gene.CpB0103065.1
gene.CpB0103117.1
gene.CpB0103188.1
gene.CpB0103419.1
gene.CpB0103431.1
gene.CpB0103493.1
gene.CpB0103506.1
gene.CpB0103546.1
gene.CpB0103551.1
gene.CpB0103614.1
gene.CpB0103644.1
gene.CpB0103714.1
gene.CpB0103748.1
gene.CpB0103785.1
gene.CpB0103786.1
gene.CpB0103788.1
gene.CpB0103813.1
gene.CpB0104036.1
gene.CpB0104060.1
gene.CpB0104102.1
gene.CpB0104164.1
gene.CpB0104236.1
gene.CpB0104265.1
gene.CpB0104276.1
gene.CpB0104308.1
gene.CpB0104416.1
gene.CpB0104455.1
gene.CpB0104457.1
gene.CpB0104552.1
gene.CpB0104555.1
gene.CpB0104580.1
gene.CpB0104623.1
gene.CpB0104651.1
gene.CpB0104704.1
gene.CpB0104766.1
gene.CpB0104787.1
gene.CpB0104801.1
gene.CpB0104804.1
gene.CpB0104839.1
gene.CpB0104889.1
gene.CpB0104944.1
gene.CpB0105051.1
gene.CpB0105052.1
gene.CpB0105069.1
gene.CpB0105174.1
gene.CpB0105237.1
gene.CpB0105278.1
gene.CpB0105351.1
gene.CpB0105364.1
gene.CpB0105468.1
gene.CpB0105558.1
gene.CpB0105601.1
gene.CpB0105721.1
gene.CpB0105841.1
gene.CpB0105843.1
gene.CpB0105960.1
gene.CpB0105965.1
gene.CpB0105968.1
gene.CpB0106041.1
gene.CpB0106112.1
gene.CpB0200108.1
gene.CpB0200114.1
gene.CpB0200144.1
gene.CpB0200145.1
gene.CpB0200151.1
gene.CpB0200215.1
gene.CpB0200252.1
gene.CpB0200262.1
gene.CpB0200288.1
gene.CpB0200378.1
gene.CpB0200548.1
gene.CpB0200549.1
gene.CpB0200581.1
gene.CpB0200608.1
gene.CpB0200625.1
gene.CpB0200875.1
gene.CpB0200924.1
gene.CpB0201058.1
gene.CpB0201160.1
gene.CpB0201210.1
gene.CpB0201329.1
gene.CpB0201376.1
gene.CpB0201397.1
gene.CpB0201406.1
gene.CpB0201610.1
gene.CpB0201621.1
gene.CpB0201653.1
gene.CpB0201663.1
gene.CpB0201700.1
gene.CpB0201840.1
gene.CpB0201895.1
gene.CpB0201896.1
gene.CpB0201909.1
gene.CpB0201911.1
gene.CpB0201974.1
gene.CpB0201989.1
gene.CpB0202251.1
gene.CpB0202302.1
gene.CpB0202345.1
gene.CpB0202359.1
gene.CpB0202368.1
gene.CpB0202400.1
gene.CpB0202411.1
gene.CpB0202425.1
gene.CpB0202568.1
gene.CpB0202589.1
gene.CpB0202641.1
gene.CpB0202658.1
gene.CpB0202678.1
gene.CpB0202722.1
gene.CpB0202726.1
gene.CpB0202741.1
gene.CpB0202742.1
gene.CpB0202787.1
gene.CpB0202917.1
gene.CpB0203037.1
gene.CpB0203103.1
gene.CpB0203111.1
gene.CpB0203188.1
gene.CpB0203229.1
gene.CpB0203251.1
gene.CpB0203306.1
gene.CpB0203408.1
gene.CpB0203498.1
gene.CpB0203515.1
gene.CpB0203556.1
gene.CpB0203653.1
gene.CpB0203659.1
gene.CpB0203684.1
gene.CpB0203725.1
gene.CpB0203809.1
gene.CpB0203812.1
gene.CpB0203823.1
gene.CpB0203849.1
gene.CpB0203919.1
gene.CpB0203978.1
gene.CpB0204054.1
gene.CpB0204059.1
gene.CpB0204121.1
gene.CpB0204180.1
gene.CpB0204235.1
gene.CpB0204243.1
gene.CpB0204306.1
gene.CpB0204372.1
gene.CpB0204393.1
gene.CpB0204439.1
gene.CpB0204475.1
gene.CpB0204591.1
gene.CpB0204638.1
gene.CpB0204662.1
gene.CpB0204680.1
gene.CpB0204709.1
gene.CpB0204767.1
gene.CpB0204807.1
gene.CpB0204861.1
gene.CpB0204873.1
gene.CpB0204954.1
gene.CpB0204981.1
gene.CpB0205034.1
gene.CpB0205060.1
gene.CpB0205074.1
gene.CpB0205081.1
gene.CpB0205158.1
gene.CpB0205228.1
gene.CpB0205256.1
gene.CpB0205287.1
gene.CpB0205317.1
gene.CpB0205388.1
gene.CpB0205410.1
gene.CpB0205440.1
gene.CpB0205443.1
gene.CpB0205445.1
gene.CpB0205466.1
gene.CpB0205531.1
gene.CpB0205617.1
gene.CpB0205670.1
gene.CpB0205800.1
gene.CpB0205812.1
gene.CpB0205843.1
gene.CpB0300205.1
gene.CpB0300230.1
gene.CpB0300231.1
gene.CpB0300289.1
gene.CpB0300374.1
gene.CpB0300378.1
gene.CpB0300397.1
gene.CpB0300424.1
gene.CpB0300425.1
gene.CpB0300551.1
gene.CpB0300572.1
gene.CpB0300617.1
gene.CpB0300636.1
gene.CpB0300637.1
gene.CpB0300671.1
gene.CpB0300843.1
gene.CpB0300924.1
gene.CpB0300997.1
gene.CpB0301023.1
gene.CpB0301061.1
gene.CpB0301093.1
gene.CpB0301111.1
gene.CpB0301187.1
gene.CpB0301295.1
gene.CpB0301595.1
gene.CpB0301815.1
gene.CpB0301895.1
gene.CpB0301933.1
gene.CpB0302061.1
gene.CpB0302106.1
gene.CpB0302129.1
gene.CpB0302150.1
gene.CpB0302186.1
gene.CpB0302306.1
gene.CpB0302334.1
gene.CpB0302356.1
gene.CpB0302641.1
gene.CpB0302664.1
gene.CpB0302704.1
gene.CpB0302713.1
gene.CpB0302729.1
gene.CpB0302737.1
gene.CpB0302739.1
gene.CpB0302769.1
gene.CpB0302797.1
gene.CpB0302833.1
gene.CpB0302903.1
gene.CpB0302945.1
gene.CpB0303037.1
gene.CpB0303092.1
gene.CpB0303108.1
gene.CpB0303177.1
gene.CpB0303261.1
gene.CpB0303284.1
gene.CpB0303295.1
gene.CpB0303309.1
gene.CpB0303439.1
gene.CpB0303479.1
gene.CpB0303483.1
gene.CpB0303536.1
gene.CpB0303571.1
gene.CpB0303590.1
gene.CpB0303639.1
gene.CpB0400029.1
gene.CpB0400037.1
gene.CpB0400084.1
gene.CpB0400156.1
gene.CpB0400185.1
gene.CpB0400205.1
gene.CpB0400213.1
gene.CpB0400312.1
gene.CpB0400341.1
gene.CpB0400361.1
gene.CpB0400392.1
gene.CpB0400399.1
gene.CpB0400417.1
gene.CpB0400497.1
gene.CpB0400597.1
gene.CpB0400630.1
gene.CpB0400634.1
gene.CpB0400789.1
gene.CpB0400790.1
gene.CpB0400813.1
gene.CpB0400816.1
gene.CpB0400859.1
gene.CpB0400907.1
gene.CpB0400954.1
gene.CpB0401016.1
gene.CpB0401017.1
gene.CpB0401032.1
gene.CpB0401033.1
gene.CpB0401038.1
gene.CpB0401054.1
gene.CpB0401189.1
gene.CpB0401225.1
gene.CpB0401242.1
gene.CpB0401247.1
gene.CpB0401248.1
gene.CpB0401320.1
gene.CpB0401341.1
gene.CpB0401421.1
gene.CpB0401476.1
gene.CpB0401632.1
gene.CpB0401665.1
gene.CpB0401732.1
gene.CpB0401783.1
gene.CpB0401836.1
gene.CpB0401863.1
gene.CpB0401948.1
gene.CpB0401986.1
gene.CpB0401990.1
gene.CpB0402089.1
gene.CpB0402171.1
gene.CpB0402193.1
gene.CpB0402249.1
gene.CpB0402263.1
gene.CpB0402486.1
gene.CpB0402489.1
gene.CpB0402502.1
gene.CpB0402677.1
gene.CpB0402752.1
gene.CpB0402763.1
gene.CpB0402775.1
gene.CpB0402780.1
gene.CpB0402855.1
gene.CpB0402902.1
gene.CpB0402939.1
gene.CpB0402942.1
gene.CpB0402961.1
gene.CpB0402972.1
gene.CpB0403046.1
gene.CpB0403109.1
gene.CpB0403281.1
gene.CpB0403291.1
gene.CpB0403334.1
gene.CpB0403342.1
gene.CpB0403349.1
gene.CpB0403368.1
gene.CpB0403647.1
gene.CpB0403702.1
gene.CpB0403885.1
gene.CpB0403891.1
gene.CpB0500128.1
gene.CpB0500233.1
gene.CpB0500237.1
gene.CpB0500242.1
gene.CpB0500259.1
gene.CpB0500275.1
gene.CpB0500324.1
gene.CpB0500330.1
gene.CpB0500411.1
gene.CpB0500420.1
gene.CpB0500504.1
gene.CpB0500515.1
gene.CpB0500585.1
gene.CpB0500601.1
gene.CpB0500615.1
gene.CpB0500633.1
gene.CpB0500635.1
gene.CpB0500641.1
gene.CpB0500644.1
gene.CpB0500645.1
gene.CpB0500647.1
gene.CpB0500716.1
gene.CpB0500780.1
gene.CpB0500806.1
gene.CpB0500894.1
gene.CpB0500903.1
gene.CpB0500909.1
gene.CpB0500965.1
gene.CpB0501122.1
gene.CpB0501143.1
gene.CpB0501256.1
gene.CpB0501272.1
gene.CpB0501282.1
gene.CpB0501299.1
gene.CpB0501396.1
gene.CpB0501485.1
gene.CpB0501505.1
gene.CpB0501512.1
gene.CpB0501525.1
gene.CpB0501530.1
gene.CpB0501555.1
gene.CpB0501558.1
gene.CpB0501664.1
gene.CpB0501706.1
gene.CpB0501725.1
gene.CpB0501799.1
gene.CpB0501805.1
gene.CpB0501847.1
gene.CpB0501960.1
gene.CpB0501978.1
gene.CpB0502045.1
gene.CpB0502071.1
gene.CpB0502116.1
gene.CpB0502169.1
gene.CpB0502181.1
gene.CpB0502204.1
gene.CpB0502221.1
gene.CpB0502389.1
gene.CpB0502400.1
gene.CpB0502453.1
gene.CpB0502540.1
gene.CpB0502614.1
gene.CpB0502622.1
gene.CpB0502699.1
gene.CpB0502711.1
gene.CpB0502747.1
gene.CpB0502753.1
gene.CpB0502768.1
gene.CpB0502822.1
gene.CpB0502826.1
gene.CpB0502877.1
gene.CpB0502990.1
gene.CpB0503144.1
gene.CpB0503201.1
gene.CpB0503243.1
gene.CpB0503284.1
gene.CpB0503413.1
gene.CpB0503450.1
gene.CpB0503471.1
gene.CpB0503537.1
gene.CpB0503631.1
gene.CpB0503654.1
gene.CpB0503661.1
gene.CpB0503790.1
gene.CpB0503804.1
gene.CpB0503876.1
gene.CpB0600011.1
gene.CpB0600128.1
gene.CpB0600146.1
gene.CpB0600160.1
gene.CpB0600183.1
gene.CpB0600293.1
gene.CpB0600310.1
gene.CpB0600391.1
gene.CpB0600491.1
gene.CpB0600641.1
gene.CpB0600648.1
gene.CpB0600656.1
gene.CpB0600674.1
gene.CpB0600683.1
gene.CpB0600713.1
gene.CpB0600838.1
gene.CpB0600895.1
gene.CpB0600966.1
gene.CpB0601054.1
gene.CpB0601082.1
gene.CpB0601087.1
gene.CpB0601123.1
gene.CpB0601129.1
gene.CpB0601134.1
gene.CpB0601138.1
gene.CpB0601151.1
gene.CpB0601199.1
gene.CpB0601224.1
gene.CpB0601226.1
gene.CpB0601229.1
gene.CpB0601282.1
gene.CpB0601433.1
gene.CpB0601450.1
gene.CpB0601591.1
gene.CpB0601667.1
gene.CpB0601693.1
gene.CpB0601700.1
gene.CpB0601724.1
gene.CpB0601735.1
gene.CpB0601736.1
gene.CpB0601802.1
gene.CpB0601812.1
gene.CpB0601841.1
gene.CpB0601865.1
gene.CpB0601910.1
gene.CpB0601911.1
gene.CpB0601932.1
gene.CpB0602014.1
gene.CpB0602047.1
gene.CpB0602072.1
gene.CpB0602107.1
gene.CpB0602122.1
gene.CpB0602140.1
gene.CpB0602175.1
gene.CpB0602188.1
gene.CpB0602482.1
gene.CpB0602500.1
gene.CpB0602517.1
gene.CpB0602565.1
gene.CpB0602645.1
gene.CpB0602741.1
gene.CpB0602754.1
gene.CpB0602760.1
gene.CpB0602819.1
gene.CpB0602859.1
gene.CpB0602960.1
gene.CpB0602972.1
gene.CpB0603055.1
gene.CpB0603093.1
gene.CpB0603214.1
gene.CpB0603228.1
gene.CpB0603233.1
gene.CpB0603280.1
gene.CpB0603391.1
gene.CpB0603395.1
gene.CpB0603488.1
gene.CpB0603502.1
gene.CpB0700095.1
gene.CpB0700174.1
gene.CpB0700184.1
gene.CpB0700224.1
gene.CpB0700265.1
gene.CpB0700293.1
gene.CpB0700333.1
gene.CpB0700399.1
gene.CpB0700404.1
gene.CpB0700430.1
gene.CpB0700538.1
gene.CpB0700551.1
gene.CpB0700617.1
gene.CpB0700629.1
gene.CpB0700656.1
gene.CpB0700809.1
gene.CpB0700839.1
gene.CpB0701029.1
gene.CpB0701045.1
gene.CpB0701097.1
gene.CpB0701116.1
gene.CpB0701249.1
gene.CpB0701255.1
gene.CpB0701276.1
gene.CpB0701400.1
gene.CpB0701412.1
gene.CpB0701440.1
gene.CpB0701444.1
gene.CpB0701452.1
gene.CpB0701478.1
gene.CpB0701497.1
gene.CpB0701508.1
gene.CpB0701574.1
gene.CpB0701594.1
gene.CpB0701596.1
gene.CpB0701602.1
gene.CpB0701617.1
gene.CpB0701635.1
gene.CpB0701931.1
gene.CpB0701972.1
gene.CpB0701973.1
gene.CpB0701974.1
gene.CpB0702000.1
gene.CpB0702046.1
gene.CpB0702053.1
gene.CpB0702107.1
gene.CpB0702192.1
gene.CpB0702242.1
gene.CpB0702252.1
gene.CpB0702350.1
gene.CpB0702402.1

## Sheet: brown
gene id
gene.Cp0000045.1
gene.Cp0000241.1
gene.Cp0000243.1
gene.Cp0000436.1
gene.Cp0000560.1
gene.Cp0000601.1
gene.Cp0000685.1
gene.Cp0000860.1
gene.Cp0000898.1
gene.Cp0001027.1
gene.Cp0001041.1
gene.Cp0001042.1
gene.Cp0001076.1
gene.Cp0001179.1
gene.Cp0001181.1
gene.Cp0001266.1
gene.Cp0001558.1
gene.Cp0001629.1
gene.Cp0001748.1
gene.CpA0100048.1
gene.CpA0100050.1
gene.CpA0100051.1
gene.CpA0100085.1
gene.CpA0100088.1
gene.CpA0100160.1
gene.CpA0100353.1
gene.CpA0100435.1
gene.CpA0100500.1
gene.CpA0100502.1
gene.CpA0100504.1
gene.CpA0100505.1
gene.CpA0100506.1
gene.CpA0100744.1
gene.CpA0100749.1
gene.CpA0100794.1
gene.CpA0100842.1
gene.CpA0101031.1
gene.CpA0101159.1
gene.CpA0101185.1
gene.CpA0101237.1
gene.CpA0101254.1
gene.CpA0101297.1
gene.CpA0101298.1
gene.CpA0101473.1
gene.CpA0101549.1
gene.CpA0101852.1
gene.CpA0101891.1
gene.CpA0101927.1
gene.CpA0101935.1
gene.CpA0101938.1
gene.CpA0101945.1
gene.CpA0102042.1
gene.CpA0102292.1
gene.CpA0102413.1
gene.CpA0102464.1
gene.CpA0102697.1
gene.CpA0102733.1
gene.CpA0102761.1
gene.CpA0102777.1
gene.CpA0102821.1
gene.CpA0102824.1
gene.CpA0102828.1
gene.CpA0102928.1
gene.CpA0102944.1
gene.CpA0103085.1
gene.CpA0103091.1
gene.CpA0103171.1
gene.CpA0103178.1
gene.CpA0103188.1
gene.CpA0103215.1
gene.CpA0103226.1
gene.CpA0103257.1
gene.CpA0103314.1
gene.CpA0103396.1
gene.CpA0103470.1
gene.CpA0103611.1
gene.CpA0103625.1
gene.CpA0103627.1
gene.CpA0103673.1
gene.CpA0103825.1
gene.CpA0103865.1
gene.CpA0104087.1
gene.CpA0104118.1
gene.CpA0104124.1
gene.CpA0104140.1
gene.CpA0104205.1
gene.CpA0104253.1
gene.CpA0104256.1
gene.CpA0104282.1
gene.CpA0104299.1
gene.CpA0104312.1
gene.CpA0104495.1
gene.CpA0104602.1
gene.CpA0104680.1
gene.CpA0104732.1
gene.CpA0104738.1
gene.CpA0104767.1
gene.CpA0104777.1
gene.CpA0104778.1
gene.CpA0104783.1
gene.CpA0104819.1
gene.CpA0104824.1
gene.CpA0104827.1
gene.CpA0105036.1
gene.CpA0105102.1
gene.CpA0105119.1
gene.CpA0105147.1
gene.CpA0105229.1
gene.CpA0105462.1
gene.CpA0105500.1
gene.CpA0105597.1
gene.CpA0105679.1
gene.CpA0105686.1
gene.CpA0105787.1
gene.CpA0105804.1
gene.CpA0200024.1
gene.CpA0200046.1
gene.CpA0200108.1
gene.CpA0200148.1
gene.CpA0200157.1
gene.CpA0200195.1
gene.CpA0200196.1
gene.CpA0200200.1
gene.CpA0200283.1
gene.CpA0200303.1
gene.CpA0200375.1
gene.CpA0200387.1
gene.CpA0200464.1
gene.CpA0200482.1
gene.CpA0200483.1
gene.CpA0200585.1
gene.CpA0200651.1
gene.CpA0200716.1
gene.CpA0200755.1
gene.CpA0200893.1
gene.CpA0200965.1
gene.CpA0201011.1
gene.CpA0201020.1
gene.CpA0201132.1
gene.CpA0201158.1
gene.CpA0201169.1
gene.CpA0201231.1
gene.CpA0201263.1
gene.CpA0201265.1
gene.CpA0201368.1
gene.CpA0201369.1
gene.CpA0201406.1
gene.CpA0201470.1
gene.CpA0201496.1
gene.CpA0201547.1
gene.CpA0201548.1
gene.CpA0201607.1
gene.CpA0201663.1
gene.CpA0201736.1
gene.CpA0201739.1
gene.CpA0201848.1
gene.CpA0201862.1
gene.CpA0201915.1
gene.CpA0201935.1
gene.CpA0201963.1
gene.CpA0201977.1
gene.CpA0202240.1
gene.CpA0202338.1
gene.CpA0202452.1
gene.CpA0202461.1
gene.CpA0202502.1
gene.CpA0202535.1
gene.CpA0202563.1
gene.CpA0202632.1
gene.CpA0202730.1
gene.CpA0202778.1
gene.CpA0202983.1
gene.CpA0203171.1
gene.CpA0203207.1
gene.CpA0203246.1
gene.CpA0203251.1
gene.CpA0203255.1
gene.CpA0203299.1
gene.CpA0203312.1
gene.CpA0203331.1
gene.CpA0203347.1
gene.CpA0203461.1
gene.CpA0203786.1
gene.CpA0203967.1
gene.CpA0203969.1
gene.CpA0204089.1
gene.CpA0204152.1
gene.CpA0204155.1
gene.CpA0204158.1
gene.CpA0204170.1
gene.CpA0204249.1
gene.CpA0204422.1
gene.CpA0204615.1
gene.CpA0204651.1
gene.CpA0204733.1
gene.CpA0204745.1
gene.CpA0204793.1
gene.CpA0300008.1
gene.CpA0300107.1
gene.CpA0300149.1
gene.CpA0300160.1
gene.CpA0300161.1
gene.CpA0300274.1
gene.CpA0300325.1
gene.CpA0300665.1
gene.CpA0300929.1
gene.CpA0300944.1
gene.CpA0301009.1
gene.CpA0301066.1
gene.CpA0301077.1
gene.CpA0301078.1
gene.CpA0301112.1
gene.CpA0301202.1
gene.CpA0301241.1
gene.CpA0301332.1
gene.CpA0301578.1
gene.CpA0301608.1
gene.CpA0301705.1
gene.CpA0301713.1
gene.CpA0301727.1
gene.CpA0301736.1
gene.CpA0301791.1
gene.CpA0301807.1
gene.CpA0301860.1
gene.CpA0301874.1
gene.CpA0301876.1
gene.CpA0301879.1
gene.CpA0301903.1
gene.CpA0301906.1
gene.CpA0301920.1
gene.CpA0301943.1
gene.CpA0301960.1
gene.CpA0302174.1
gene.CpA0302276.1
gene.CpA0302278.1
gene.CpA0302279.1
gene.CpA0302296.1
gene.CpA0302399.1
gene.CpA0302444.1
gene.CpA0302472.1
gene.CpA0302638.1
gene.CpA0302677.1
gene.CpA0302684.1
gene.CpA0302759.1
gene.CpA0302771.1
gene.CpA0302811.1
gene.CpA0302950.1
gene.CpA0303000.1
gene.CpA0303043.1
gene.CpA0303121.1
gene.CpA0303218.1
gene.CpA0303231.1
gene.CpA0303232.1
gene.CpA0303255.1
gene.CpA0303511.1
gene.CpA0303517.1
gene.CpA0303527.1
gene.CpA0303540.1
gene.CpA0303717.1
gene.CpA0303754.1
gene.CpA0303881.1
gene.CpA0303885.1
gene.CpA0303943.1
gene.CpA0303957.1
gene.CpA0303959.1
gene.CpA0304022.1
gene.CpA0304122.1
gene.CpA0400013.1
gene.CpA0400026.1
gene.CpA0400035.1
gene.CpA0400305.1
gene.CpA0400484.1
gene.CpA0400644.1
gene.CpA0400674.1
gene.CpA0400723.1
gene.CpA0400805.1
gene.CpA0400890.1
gene.CpA0400913.1
gene.CpA0400954.1
gene.CpA0401011.1
gene.CpA0401019.1
gene.CpA0401040.1
gene.CpA0401219.1
gene.CpA0401474.1
gene.CpA0401501.1
gene.CpA0401531.1
gene.CpA0401662.1
gene.CpA0401887.1
gene.CpA0401993.1
gene.CpA0402007.1
gene.CpA0402135.1
gene.CpA0402211.1
gene.CpA0402383.1
gene.CpA0402409.1
gene.CpA0402467.1
gene.CpA0402506.1
gene.CpA0402533.1
gene.CpA0402556.1
gene.CpA0402580.1
gene.CpA0402735.1
gene.CpA0402799.1
gene.CpA0402891.1
gene.CpA0402934.1
gene.CpA0402938.1
gene.CpA0402953.1
gene.CpA0403004.1
gene.CpA0403021.1
gene.CpA0403048.1
gene.CpA0403078.1
gene.CpA0403106.1
gene.CpA0403129.1
gene.CpA0403130.1
gene.CpA0403140.1
gene.CpA0403144.1
gene.CpA0403145.1
gene.CpA0403301.1
gene.CpA0403460.1
gene.CpA0403511.1
gene.CpA0403524.1
gene.CpA0403556.1
gene.CpA0403557.1
gene.CpA0403655.1
gene.CpA0403656.1
gene.CpA0403666.1
gene.CpA0403687.1
gene.CpA0403809.1
gene.CpA0403822.1
gene.CpA0403922.1
gene.CpA0403938.1
gene.CpA0404025.1
gene.CpA0404032.1
gene.CpA0404041.1
gene.CpA0404110.1
gene.CpA0404215.1
gene.CpA0404276.1
gene.CpA0404281.1
gene.CpA0404594.1
gene.CpA0404687.1
gene.CpA0404711.1
gene.CpA0404770.1
gene.CpA0404821.1
gene.CpA0404975.1
gene.CpA0405197.1
gene.CpA0405232.1
gene.CpA0405296.1
gene.CpA0405575.1
gene.CpA0405625.1
gene.CpA0405644.1
gene.CpA0405676.1
gene.CpA0405685.1
gene.CpA0405705.1
gene.CpA0405758.1
gene.CpA0405769.1
gene.CpA0405866.1
gene.CpA0500078.1
gene.CpA0500122.1
gene.CpA0500123.1
gene.CpA0500124.1
gene.CpA0500252.1
gene.CpA0500322.1
gene.CpA0500357.1
gene.CpA0500364.1
gene.CpA0500428.1
gene.CpA0500508.1
gene.CpA0500509.1
gene.CpA0500546.1
gene.CpA0500547.1
gene.CpA0500548.1
gene.CpA0500684.1
gene.CpA0500720.1
gene.CpA0500776.1
gene.CpA0500809.1
gene.CpA0500818.1
gene.CpA0501147.1
gene.CpA0501196.1
gene.CpA0501233.1
gene.CpA0501381.1
gene.CpA0501401.1
gene.CpA0501472.1
gene.CpA0501502.1
gene.CpA0501528.1
gene.CpA0501529.1
gene.CpA0501558.1
gene.CpA0501589.1
gene.CpA0501590.1
gene.CpA0501592.1
gene.CpA0501620.1
gene.CpA0501627.1
gene.CpA0501678.1
gene.CpA0501831.1
gene.CpA0501836.1
gene.CpA0501850.1
gene.CpA0501856.1
gene.CpA0501885.1
gene.CpA0502349.1
gene.CpA0502360.1
gene.CpA0502367.1
gene.CpA0502407.1
gene.CpA0502410.1
gene.CpA0502426.1
gene.CpA0502487.1
gene.CpA0502501.1
gene.CpA0502557.1
gene.CpA0502586.1
gene.CpA0502628.1
gene.CpA0502700.1
gene.CpA0502746.1
gene.CpA0502878.1
gene.CpA0502888.1
gene.CpA0502899.1
gene.CpA0503081.1
gene.CpA0503188.1
gene.CpA0503290.1
gene.CpA0503363.1
gene.CpA0503372.1
gene.CpA0503446.1
gene.CpA0503498.1
gene.CpA0503500.1
gene.CpA0503505.1
gene.CpA0503705.1
gene.CpA0503737.1
gene.CpA0503915.1
gene.CpA0503926.1
gene.CpA0503927.1
gene.CpA0503972.1
gene.CpA0503979.1
gene.CpA0504118.1
gene.CpA0504119.1
gene.CpA0504164.1
gene.CpA0504263.1
gene.CpA0504303.1
gene.CpA0504310.1
gene.CpA0504322.1
gene.CpA0504330.1
gene.CpA0504331.1
gene.CpA0504342.1
gene.CpA0504468.1
gene.CpA0504512.1
gene.CpA0504573.1
gene.CpA0504589.1
gene.CpA0504662.1
gene.CpA0504705.1
gene.CpA0504710.1
gene.CpA0504748.1
gene.CpA0504842.1
gene.CpA0504912.1
gene.CpA0505008.1
gene.CpA0505075.1
gene.CpA0505079.1
gene.CpA0600086.1
gene.CpA0600167.1
gene.CpA0600305.1
gene.CpA0600308.1
gene.CpA0600315.1
gene.CpA0600487.1
gene.CpA0600488.1
gene.CpA0600500.1
gene.CpA0600528.1
gene.CpA0600531.1
gene.CpA0600541.1
gene.CpA0600609.1
gene.CpA0600615.1
gene.CpA0600640.1
gene.CpA0600667.1
gene.CpA0600683.1
gene.CpA0600715.1
gene.CpA0600718.1
gene.CpA0600747.1
gene.CpA0600773.1
gene.CpA0600828.1
gene.CpA0600846.1
gene.CpA0600955.1
gene.CpA0601006.1
gene.CpA0601011.1
gene.CpA0601018.1
gene.CpA0601022.1
gene.CpA0601076.1
gene.CpA0601175.1
gene.CpA0601195.1
gene.CpA0601203.1
gene.CpA0601237.1
gene.CpA0601260.1
gene.CpA0601301.1
gene.CpA0601306.1
gene.CpA0601385.1
gene.CpA0601386.1
gene.CpA0601401.1
gene.CpA0601476.1
gene.CpA0601489.1
gene.CpA0601518.1
gene.CpA0601554.1
gene.CpA0601603.1
gene.CpA0601711.1
gene.CpA0601731.1
gene.CpA0601756.1
gene.CpA0601802.1
gene.CpA0601894.1
gene.CpA0601929.1
gene.CpA0601930.1
gene.CpA0601951.1
gene.CpA0602041.1
gene.CpA0602057.1
gene.CpA0602163.1
gene.CpA0602229.1
gene.CpA0602250.1
gene.CpA0602296.1
gene.CpA0602371.1
gene.CpA0602390.1
gene.CpA0602414.1
gene.CpA0602593.1
gene.CpA0602721.1
gene.CpA0602813.1
gene.CpA0602901.1
gene.CpA0602904.1
gene.CpA0602907.1
gene.CpA0602946.1
gene.CpA0602966.1
gene.CpA0602970.1
gene.CpA0603069.1
gene.CpA0603097.1
gene.CpA0603098.1
gene.CpA0603163.1
gene.CpA0603182.1
gene.CpA0603250.1
gene.CpA0603275.1
gene.CpA0603395.1
gene.CpA0603615.1
gene.CpA0603649.1
gene.CpA0603655.1
gene.CpA0603714.1
gene.CpA0603752.1
gene.CpA0603821.1
gene.CpA0603826.1
gene.CpA0603894.1
gene.CpA0603895.1
gene.CpA0603916.1
gene.CpA0603965.1
gene.CpA0604029.1
gene.CpA0604041.1
gene.CpA0700120.1
gene.CpA0700201.1
gene.CpA0700269.1
gene.CpA0700271.1
gene.CpA0700292.1
gene.CpA0700353.1
gene.CpA0700363.1
gene.CpA0700477.1
gene.CpA0700500.1
gene.CpA0700542.1
gene.CpA0700593.1
gene.CpA0700713.1
gene.CpA0700717.1
gene.CpA0700777.1
gene.CpA0700887.1
gene.CpA0700917.1
gene.CpA0700919.1
gene.CpA0700939.1
gene.CpA0701017.1
gene.CpA0701044.1
gene.CpA0701064.1
gene.CpA0701170.1
gene.CpA0701231.1
gene.CpA0701325.1
gene.CpA0701409.1
gene.CpA0701433.1
gene.CpA0701438.1
gene.CpA0701680.1
gene.CpA0701712.1
gene.CpA0701713.1
gene.CpA0701715.1
gene.CpA0701721.1
gene.CpA0701781.1
gene.CpA0701820.1
gene.CpA0701844.1
gene.CpA0701874.1
gene.CpA0701902.1
gene.CpA0701914.1
gene.CpA0701956.1
gene.CpA0701998.1
gene.CpA0701999.1
gene.CpA0702015.1
gene.CpA0702017.1
gene.CpA0702021.1
gene.CpA0702081.1
gene.CpA0702123.1
gene.CpA0702124.1
gene.CpA0702267.1
gene.CpA0702367.1
gene.CpA0702516.1
gene.CpA0702569.1
gene.CpA0702654.1
gene.CpA0702688.1
gene.CpA0702873.1
gene.CpA0702875.1
gene.CpA0702876.1
gene.CpA0702918.1
gene.CpA0702963.1
gene.CpA0703005.1
gene.CpA0703017.1
gene.CpA0703052.1
gene.CpA0703058.1
gene.CpA0703116.1
gene.CpA0703120.1
gene.CpA0703203.1
gene.CpA0703446.1
gene.CpA0703464.1
gene.CpA0703520.1
gene.CpA0703634.1
gene.CpA0703657.1
gene.CpA0703662.1
gene.CpA0703676.1
gene.CpA0703791.1
gene.CpA0703858.1
gene.CpA0703859.1
gene.CpA0703910.1
gene.CpA0703911.1
gene.CpA0703943.1
gene.CpA0703955.1
gene.CpA0703996.1
gene.CpA0704002.1
gene.CpA0704003.1
gene.CpA0704209.1
gene.CpA0704308.1
gene.CpA0704338.1
gene.CpA0704360.1
gene.CpB0100035.1
gene.CpB0100096.1
gene.CpB0100327.1
gene.CpB0100499.1
gene.CpB0100545.1
gene.CpB0100552.1
gene.CpB0100849.1
gene.CpB0100955.1
gene.CpB0101102.1
gene.CpB0101109.1
gene.CpB0101117.1
gene.CpB0101316.1
gene.CpB0101390.1
gene.CpB0101401.1
gene.CpB0101553.1
gene.CpB0101571.1
gene.CpB0101614.1
gene.CpB0101673.1
gene.CpB0101840.1
gene.CpB0101843.1
gene.CpB0101900.1
gene.CpB0102151.1
gene.CpB0102227.1
gene.CpB0102255.1
gene.CpB0102268.1
gene.CpB0102323.1
gene.CpB0102325.1
gene.CpB0102338.1
gene.CpB0102353.1
gene.CpB0102354.1
gene.CpB0102490.1
gene.CpB0102639.1
gene.CpB0102780.1
gene.CpB0102937.1
gene.CpB0103088.1
gene.CpB0103217.1
gene.CpB0103277.1
gene.CpB0103291.1
gene.CpB0103296.1
gene.CpB0103385.1
gene.CpB0103508.1
gene.CpB0103534.1
gene.CpB0103576.1
gene.CpB0103652.1
gene.CpB0103669.1
gene.CpB0103717.1
gene.CpB0103753.1
gene.CpB0103769.1
gene.CpB0103771.1
gene.CpB0103887.1
gene.CpB0103916.1
gene.CpB0103949.1
gene.CpB0103950.1
gene.CpB0104010.1
gene.CpB0104115.1
gene.CpB0104189.1
gene.CpB0104230.1
gene.CpB0104264.1
gene.CpB0104509.1
gene.CpB0104543.1
gene.CpB0104546.1
gene.CpB0104596.1
gene.CpB0104620.1
gene.CpB0104705.1
gene.CpB0104724.1
gene.CpB0104778.1
gene.CpB0104779.1
gene.CpB0104788.1
gene.CpB0104795.1
gene.CpB0104807.1
gene.CpB0104892.1
gene.CpB0105011.1
gene.CpB0105077.1
gene.CpB0105263.1
gene.CpB0105330.1
gene.CpB0105333.1
gene.CpB0105341.1
gene.CpB0105373.1
gene.CpB0105379.1
gene.CpB0105406.1
gene.CpB0105494.1
gene.CpB0105531.1
gene.CpB0105565.1
gene.CpB0105567.1
gene.CpB0105687.1
gene.CpB0105761.1
gene.CpB0105792.1
gene.CpB0105817.1
gene.CpB0105879.1
gene.CpB0105936.1
gene.CpB0106084.1
gene.CpB0200057.1
gene.CpB0200075.1
gene.CpB0200173.1
gene.CpB0200174.1
gene.CpB0200238.1
gene.CpB0200357.1
gene.CpB0200365.1
gene.CpB0200466.1
gene.CpB0200472.1
gene.CpB0200495.1
gene.CpB0200543.1
gene.CpB0200706.1
gene.CpB0200757.1
gene.CpB0200848.1
gene.CpB0200930.1
gene.CpB0200948.1
gene.CpB0200957.1
gene.CpB0200974.1
gene.CpB0200975.1
gene.CpB0200977.1
gene.CpB0200995.1
gene.CpB0201047.1
gene.CpB0201087.1
gene.CpB0201196.1
gene.CpB0201208.1
gene.CpB0201243.1
gene.CpB0201301.1
gene.CpB0201383.1
gene.CpB0201520.1
gene.CpB0201523.1
gene.CpB0201571.1
gene.CpB0201576.1
gene.CpB0201633.1
gene.CpB0201656.1
gene.CpB0201674.1
gene.CpB0201679.1
gene.CpB0201680.1
gene.CpB0201707.1
gene.CpB0201744.1
gene.CpB0201754.1
gene.CpB0201766.1
gene.CpB0201775.1
gene.CpB0201809.1
gene.CpB0201863.1
gene.CpB0201877.1
gene.CpB0202004.1
gene.CpB0202014.1
gene.CpB0202033.1
gene.CpB0202144.1
gene.CpB0202173.1
gene.CpB0202268.1
gene.CpB0202401.1
gene.CpB0202455.1
gene.CpB0202482.1
gene.CpB0202522.1
gene.CpB0202529.1
gene.CpB0202577.1
gene.CpB0202622.1
gene.CpB0202629.1
gene.CpB0202645.1
gene.CpB0202664.1
gene.CpB0202674.1
gene.CpB0202686.1
gene.CpB0202857.1
gene.CpB0202899.1
gene.CpB0202963.1
gene.CpB0203059.1
gene.CpB0203063.1
gene.CpB0203073.1
gene.CpB0203143.1
gene.CpB0203206.1
gene.CpB0203207.1
gene.CpB0203288.1
gene.CpB0203289.1
gene.CpB0203317.1
gene.CpB0203320.1
gene.CpB0203350.1
gene.CpB0203461.1
gene.CpB0203518.1
gene.CpB0203668.1
gene.CpB0203691.1
gene.CpB0203698.1
gene.CpB0203702.1
gene.CpB0203763.1
gene.CpB0203841.1
gene.CpB0203845.1
gene.CpB0203893.1
gene.CpB0203926.1
gene.CpB0204002.1
gene.CpB0204043.1
gene.CpB0204048.1
gene.CpB0204077.1
gene.CpB0204129.1
gene.CpB0204142.1
gene.CpB0204177.1
gene.CpB0204230.1
gene.CpB0204410.1
gene.CpB0204539.1
gene.CpB0204544.1
gene.CpB0204576.1
gene.CpB0204640.1
gene.CpB0204684.1
gene.CpB0204702.1
gene.CpB0204713.1
gene.CpB0204777.1
gene.CpB0204785.1
gene.CpB0204876.1
gene.CpB0204939.1
gene.CpB0204999.1
gene.CpB0205003.1
gene.CpB0205022.1
gene.CpB0205030.1
gene.CpB0205103.1
gene.CpB0205160.1
gene.CpB0205224.1
gene.CpB0205263.1
gene.CpB0205422.1
gene.CpB0205472.1
gene.CpB0205473.1
gene.CpB0205527.1
gene.CpB0205599.1
gene.CpB0205613.1
gene.CpB0205632.1
gene.CpB0205645.1
gene.CpB0205647.1
gene.CpB0205652.1
gene.CpB0205656.1
gene.CpB0205697.1
gene.CpB0205710.1
gene.CpB0205712.1
gene.CpB0205744.1
gene.CpB0205754.1
gene.CpB0300173.1
gene.CpB0300326.1
gene.CpB0300331.1
gene.CpB0300332.1
gene.CpB0300462.1
gene.CpB0300541.1
gene.CpB0300542.1
gene.CpB0300598.1
gene.CpB0300603.1
gene.CpB0300658.1
gene.CpB0300687.1
gene.CpB0300716.1
gene.CpB0300790.1
gene.CpB0300817.1
gene.CpB0300852.1
gene.CpB0300884.1
gene.CpB0300887.1
gene.CpB0300890.1
gene.CpB0300910.1
gene.CpB0300920.1
gene.CpB0300932.1
gene.CpB0301177.1
gene.CpB0301332.1
gene.CpB0301361.1
gene.CpB0301405.1
gene.CpB0301667.1
gene.CpB0301696.1
gene.CpB0301722.1
gene.CpB0301728.1
gene.CpB0301741.1
gene.CpB0301761.1
gene.CpB0301762.1
gene.CpB0301821.1
gene.CpB0301892.1
gene.CpB0301981.1
gene.CpB0302034.1
gene.CpB0302265.1
gene.CpB0302266.1
gene.CpB0302340.1
gene.CpB0302455.1
gene.CpB0302467.1
gene.CpB0302476.1
gene.CpB0302624.1
gene.CpB0302635.1
gene.CpB0302678.1
gene.CpB0302902.1
gene.CpB0303015.1
gene.CpB0303099.1
gene.CpB0303168.1
gene.CpB0303181.1
gene.CpB0303256.1
gene.CpB0303265.1
gene.CpB0303303.1
gene.CpB0303313.1
gene.CpB0303384.1
gene.CpB0303473.1
gene.CpB0303532.1
gene.CpB0303556.1
gene.CpB0303557.1
gene.CpB0303558.1
gene.CpB0303573.1
gene.CpB0303574.1
gene.CpB0303593.1
gene.CpB0303649.1
gene.CpB0400013.1
gene.CpB0400014.1
gene.CpB0400059.1
gene.CpB0400202.1
gene.CpB0400206.1
gene.CpB0400219.1
gene.CpB0400437.1
gene.CpB0400478.1
gene.CpB0400586.1
gene.CpB0400587.1
gene.CpB0400605.1
gene.CpB0400625.1
gene.CpB0400758.1
gene.CpB0400770.1
gene.CpB0400773.1
gene.CpB0400797.1
gene.CpB0400910.1
gene.CpB0400913.1
gene.CpB0400930.1
gene.CpB0400991.1
gene.CpB0401028.1
gene.CpB0401080.1
gene.CpB0401230.1
gene.CpB0401384.1
gene.CpB0401455.1
gene.CpB0401487.1
gene.CpB0401497.1
gene.CpB0401685.1
gene.CpB0401691.1
gene.CpB0401767.1
gene.CpB0401855.1
gene.CpB0401895.1
gene.CpB0401965.1
gene.CpB0401987.1
gene.CpB0402019.1
gene.CpB0402026.1
gene.CpB0402124.1
gene.CpB0402200.1
gene.CpB0402259.1
gene.CpB0402260.1
gene.CpB0402354.1
gene.CpB0402490.1
gene.CpB0402518.1
gene.CpB0402740.1
gene.CpB0402759.1
gene.CpB0402783.1
gene.CpB0402874.1
gene.CpB0402901.1
gene.CpB0402905.1
gene.CpB0402966.1
gene.CpB0402969.1
gene.CpB0403058.1
gene.CpB0403161.1
gene.CpB0403209.1
gene.CpB0403211.1
gene.CpB0403215.1
gene.CpB0403373.1
gene.CpB0403386.1
gene.CpB0403387.1
gene.CpB0403490.1
gene.CpB0403500.1
gene.CpB0403543.1
gene.CpB0403579.1
gene.CpB0403740.1
gene.CpB0403886.1
gene.CpB0403901.1
gene.CpB0403932.1
gene.CpB0500137.1
gene.CpB0500161.1
gene.CpB0500168.1
gene.CpB0500212.1
gene.CpB0500291.1
gene.CpB0500352.1
gene.CpB0500355.1
gene.CpB0500392.1
gene.CpB0500394.1
gene.CpB0500395.1
gene.CpB0500396.1
gene.CpB0500434.1
gene.CpB0500467.1
gene.CpB0500498.1
gene.CpB0500590.1
gene.CpB0500616.1
gene.CpB0500695.1
gene.CpB0500718.1
gene.CpB0500746.1
gene.CpB0500748.1
gene.CpB0500774.1
gene.CpB0500813.1
gene.CpB0500817.1
gene.CpB0500827.1
gene.CpB0500847.1
gene.CpB0500883.1
gene.CpB0500913.1
gene.CpB0500942.1
gene.CpB0500948.1
gene.CpB0500969.1
gene.CpB0501090.1
gene.CpB0501117.1
gene.CpB0501202.1
gene.CpB0501213.1
gene.CpB0501307.1
gene.CpB0501309.1
gene.CpB0501392.1
gene.CpB0501422.1
gene.CpB0501545.1
gene.CpB0501592.1
gene.CpB0501599.1
gene.CpB0501620.1
gene.CpB0501642.1
gene.CpB0501643.1
gene.CpB0501644.1
gene.CpB0501645.1
gene.CpB0501674.1
gene.CpB0501727.1
gene.CpB0501775.1
gene.CpB0501788.1
gene.CpB0501824.1
gene.CpB0501849.1
gene.CpB0501866.1
gene.CpB0501899.1
gene.CpB0501950.1
gene.CpB0501998.1
gene.CpB0502054.1
gene.CpB0502064.1
gene.CpB0502078.1
gene.CpB0502257.1
gene.CpB0502356.1
gene.CpB0502407.1
gene.CpB0502440.1
gene.CpB0502607.1
gene.CpB0502706.1
gene.CpB0502738.1
gene.CpB0502781.1
gene.CpB0502783.1
gene.CpB0502814.1
gene.CpB0502817.1
gene.CpB0502820.1
gene.CpB0502829.1
gene.CpB0502864.1
gene.CpB0502907.1
gene.CpB0502945.1
gene.CpB0502982.1
gene.CpB0502983.1
gene.CpB0503076.1
gene.CpB0503167.1
gene.CpB0503171.1
gene.CpB0503382.1
gene.CpB0503529.1
gene.CpB0503554.1
gene.CpB0503589.1
gene.CpB0503605.1
gene.CpB0503688.1
gene.CpB0600019.1
gene.CpB0600072.1
gene.CpB0600139.1
gene.CpB0600260.1
gene.CpB0600370.1
gene.CpB0600414.1
gene.CpB0600619.1
gene.CpB0600639.1
gene.CpB0600703.1
gene.CpB0600796.1
gene.CpB0600903.1
gene.CpB0600960.1
gene.CpB0601022.1
gene.CpB0601049.1
gene.CpB0601069.1
gene.CpB0601093.1
gene.CpB0601114.1
gene.CpB0601391.1
gene.CpB0601401.1
gene.CpB0601467.1
gene.CpB0601598.1
gene.CpB0601675.1
gene.CpB0601816.1
gene.CpB0601845.1
gene.CpB0601858.1
gene.CpB0601900.1
gene.CpB0601996.1
gene.CpB0602005.1
gene.CpB0602027.1
gene.CpB0602034.1
gene.CpB0602286.1
gene.CpB0602288.1
gene.CpB0602361.1
gene.CpB0602362.1
gene.CpB0602379.1
gene.CpB0602475.1
gene.CpB0602509.1
gene.CpB0602515.1
gene.CpB0602534.1
gene.CpB0602667.1
gene.CpB0602738.1
gene.CpB0602794.1
gene.CpB0602812.1
gene.CpB0602816.1
gene.CpB0602842.1
gene.CpB0602875.1
gene.CpB0602880.1
gene.CpB0602954.1
gene.CpB0602979.1
gene.CpB0602980.1
gene.CpB0603049.1
gene.CpB0603127.1
gene.CpB0603186.1
gene.CpB0603235.1
gene.CpB0603327.1
gene.CpB0603382.1
gene.CpB0700042.1
gene.CpB0700146.1
gene.CpB0700153.1
gene.CpB0700186.1
gene.CpB0700187.1
gene.CpB0700220.1
gene.CpB0700236.1
gene.CpB0700247.1
gene.CpB0700281.1
gene.CpB0700305.1
gene.CpB0700356.1
gene.CpB0700474.1
gene.CpB0700530.1
gene.CpB0700569.1
gene.CpB0700611.1
gene.CpB0700765.1
gene.CpB0700814.1
gene.CpB0700882.1
gene.CpB0700895.1
gene.CpB0700953.1
gene.CpB0700955.1
gene.CpB0700958.1
gene.CpB0701008.1
gene.CpB0701026.1
gene.CpB0701035.1
gene.CpB0701036.1
gene.CpB0701061.1
gene.CpB0701115.1
gene.CpB0701138.1
gene.CpB0701147.1
gene.CpB0701244.1
gene.CpB0701278.1
gene.CpB0701518.1
gene.CpB0701802.1
gene.CpB0701926.1
gene.CpB0701940.1
gene.CpB0701948.1
gene.CpB0701949.1
gene.CpB0702043.1
gene.CpB0702048.1
gene.CpB0702049.1
gene.CpB0702212.1
gene.CpB0702289.1
gene.CpB0702303.1
gene.CpB0702358.1
gene.CpB0702381.1

## Sheet: turquoise
gene id
gene.Cp0000001.1
gene.Cp0000014.1
gene.Cp0000193.1
gene.Cp0000194.1
gene.Cp0000221.1
gene.Cp0000233.1
gene.Cp0000253.1
gene.Cp0000286.1
gene.Cp0000305.1
gene.Cp0000358.1
gene.Cp0000523.1
gene.Cp0000525.1
gene.Cp0000526.1
gene.Cp0000527.1
gene.Cp0000535.1
gene.Cp0000553.1
gene.Cp0000555.1
gene.Cp0000556.1
gene.Cp0000557.1
gene.Cp0000625.1
gene.Cp0000650.1
gene.Cp0000666.1
gene.Cp0000718.1
gene.Cp0000778.1
gene.Cp0000779.1
gene.Cp0000780.1
gene.Cp0000841.1
gene.Cp0000871.1
gene.Cp0000892.1
gene.Cp0000955.1
gene.Cp0000985.1
gene.Cp0000994.1
gene.Cp0001019.1
gene.Cp0001100.1
gene.Cp0001159.1
gene.Cp0001160.1
gene.Cp0001162.1
gene.Cp0001164.1
gene.Cp0001165.1
gene.Cp0001177.1
gene.Cp0001191.1
gene.Cp0001206.1
gene.Cp0001263.1
gene.Cp0001285.1
gene.Cp0001317.1
gene.Cp0001338.1
gene.Cp0001347.1
gene.Cp0001357.1
gene.Cp0001387.1
gene.Cp0001405.1
gene.Cp0001418.1
gene.Cp0001449.1
gene.Cp0001486.1
gene.Cp0001495.1
gene.Cp0001517.1
gene.Cp0001519.1
gene.Cp0001527.1
gene.Cp0001552.1
gene.Cp0001563.1
gene.Cp0001608.1
gene.Cp0001632.1
gene.Cp0001679.1
gene.Cp0001680.1
gene.Cp0001682.1
gene.Cp0001704.1
gene.CpA0100023.1
gene.CpA0100049.1
gene.CpA0100107.1
gene.CpA0100108.1
gene.CpA0100115.1
gene.CpA0100197.1
gene.CpA0100234.1
gene.CpA0100235.1
gene.CpA0100246.1
gene.CpA0100247.1
gene.CpA0100263.1
gene.CpA0100264.1
gene.CpA0100327.1
gene.CpA0100345.1
gene.CpA0100390.1
gene.CpA0100415.1
gene.CpA0100481.1
gene.CpA0100550.1
gene.CpA0100591.1
gene.CpA0100696.1
gene.CpA0100715.1
gene.CpA0100747.1
gene.CpA0100758.1
gene.CpA0100796.1
gene.CpA0100864.1
gene.CpA0100882.1
gene.CpA0101000.1
gene.CpA0101053.1
gene.CpA0101071.1
gene.CpA0101117.1
gene.CpA0101212.1
gene.CpA0101231.1
gene.CpA0101233.1
gene.CpA0101323.1
gene.CpA0101371.1
gene.CpA0101375.1
gene.CpA0101495.1
gene.CpA0101649.1
gene.CpA0101652.1
gene.CpA0101657.1
gene.CpA0101663.1
gene.CpA0101707.1
gene.CpA0101781.1
gene.CpA0101783.1
gene.CpA0101841.1
gene.CpA0101842.1
gene.CpA0101865.1
gene.CpA0101886.1
gene.CpA0101901.1
gene.CpA0101913.1
gene.CpA0101914.1
gene.CpA0101947.1
gene.CpA0101953.1
gene.CpA0101966.1
gene.CpA0101987.1
gene.CpA0101992.1
gene.CpA0101994.1
gene.CpA0102021.1
gene.CpA0102043.1
gene.CpA0102048.1
gene.CpA0102052.1
gene.CpA0102063.1
gene.CpA0102064.1
gene.CpA0102075.1
gene.CpA0102109.1
gene.CpA0102110.1
gene.CpA0102111.1
gene.CpA0102117.1
gene.CpA0102148.1
gene.CpA0102151.1
gene.CpA0102207.1
gene.CpA0102330.1
gene.CpA0102342.1
gene.CpA0102344.1
gene.CpA0102349.1
gene.CpA0102369.1
gene.CpA0102374.1
gene.CpA0102382.1
gene.CpA0102391.1
gene.CpA0102410.1
gene.CpA0102441.1
gene.CpA0102444.1
gene.CpA0102445.1
gene.CpA0102463.1
gene.CpA0102539.1
gene.CpA0102573.1
gene.CpA0102627.1
gene.CpA0102651.1
gene.CpA0102687.1
gene.CpA0102726.1
gene.CpA0102727.1
gene.CpA0102728.1
gene.CpA0102762.1
gene.CpA0102789.1
gene.CpA0102793.1
gene.CpA0102794.1
gene.CpA0102808.1
gene.CpA0102811.1
gene.CpA0102833.1
gene.CpA0102853.1
gene.CpA0102854.1
gene.CpA0102923.1
gene.CpA0102978.1
gene.CpA0103003.1
gene.CpA0103005.1
gene.CpA0103066.1
gene.CpA0103068.1
gene.CpA0103072.1
gene.CpA0103079.1
gene.CpA0103081.1
gene.CpA0103099.1
gene.CpA0103112.1
gene.CpA0103113.1
gene.CpA0103132.1
gene.CpA0103163.1
gene.CpA0103167.1
gene.CpA0103170.1
gene.CpA0103174.1
gene.CpA0103196.1
gene.CpA0103214.1
gene.CpA0103275.1
gene.CpA0103280.1
gene.CpA0103316.1
gene.CpA0103331.1
gene.CpA0103332.1
gene.CpA0103345.1
gene.CpA0103346.1
gene.CpA0103350.1
gene.CpA0103353.1
gene.CpA0103365.1
gene.CpA0103386.1
gene.CpA0103404.1
gene.CpA0103407.1
gene.CpA0103423.1
gene.CpA0103428.1
gene.CpA0103461.1
gene.CpA0103469.1
gene.CpA0103474.1
gene.CpA0103502.1
gene.CpA0103503.1
gene.CpA0103512.1
gene.CpA0103524.1
gene.CpA0103525.1
gene.CpA0103533.1
gene.CpA0103573.1
gene.CpA0103587.1
gene.CpA0103619.1
gene.CpA0103621.1
gene.CpA0103631.1
gene.CpA0103657.1
gene.CpA0103694.1
gene.CpA0103705.1
gene.CpA0103711.1
gene.CpA0103722.1
gene.CpA0103778.1
gene.CpA0103795.1
gene.CpA0103802.1
gene.CpA0103806.1
gene.CpA0103822.1
gene.CpA0103827.1
gene.CpA0103874.1
gene.CpA0103890.1
gene.CpA0103891.1
gene.CpA0103896.1
gene.CpA0103900.1
gene.CpA0103908.1
gene.CpA0103923.1
gene.CpA0103926.1
gene.CpA0103930.1
gene.CpA0103932.1
gene.CpA0103933.1
gene.CpA0103980.1
gene.CpA0104002.1
gene.CpA0104026.1
gene.CpA0104046.1
gene.CpA0104076.1
gene.CpA0104078.1
gene.CpA0104086.1
gene.CpA0104098.1
gene.CpA0104112.1
gene.CpA0104132.1
gene.CpA0104155.1
gene.CpA0104156.1
gene.CpA0104195.1
gene.CpA0104197.1
gene.CpA0104199.1
gene.CpA0104228.1
gene.CpA0104278.1
gene.CpA0104281.1
gene.CpA0104311.1
gene.CpA0104328.1
gene.CpA0104342.1
gene.CpA0104351.1
gene.CpA0104354.1
gene.CpA0104362.1
gene.CpA0104400.1
gene.CpA0104428.1
gene.CpA0104437.1
gene.CpA0104440.1
gene.CpA0104455.1
gene.CpA0104463.1
gene.CpA0104556.1
gene.CpA0104637.1
gene.CpA0104652.1
gene.CpA0104659.1
gene.CpA0104673.1
gene.CpA0104700.1
gene.CpA0104788.1
gene.CpA0104828.1
gene.CpA0104879.1
gene.CpA0104885.1
gene.CpA0104918.1
gene.CpA0105010.1
gene.CpA0105185.1
gene.CpA0105219.1
gene.CpA0105234.1
gene.CpA0105258.1
gene.CpA0105313.1
gene.CpA0105355.1
gene.CpA0105412.1
gene.CpA0105437.1
gene.CpA0105468.1
gene.CpA0105472.1
gene.CpA0105482.1
gene.CpA0105504.1
gene.CpA0105508.1
gene.CpA0105512.1
gene.CpA0105524.1
gene.CpA0105533.1
gene.CpA0105540.1
gene.CpA0105541.1
gene.CpA0105544.1
gene.CpA0105548.1
gene.CpA0105644.1
gene.CpA0105747.1
gene.CpA0105764.1
gene.CpA0105773.1
gene.CpA0105774.1
gene.CpA0105799.1
gene.CpA0200041.1
gene.CpA0200060.1
gene.CpA0200153.1
gene.CpA0200155.1
gene.CpA0200164.1
gene.CpA0200179.1
gene.CpA0200201.1
gene.CpA0200204.1
gene.CpA0200308.1
gene.CpA0200336.1
gene.CpA0200357.1
gene.CpA0200379.1
gene.CpA0200417.1
gene.CpA0200433.1
gene.CpA0200435.1
gene.CpA0200440.1
gene.CpA0200446.1
gene.CpA0200453.1
gene.CpA0200457.1
gene.CpA0200468.1
gene.CpA0200546.1
gene.CpA0200588.1
gene.CpA0200589.1
gene.CpA0200613.1
gene.CpA0200615.1
gene.CpA0200702.1
gene.CpA0200714.1
gene.CpA0200717.1
gene.CpA0200729.1
gene.CpA0200896.1
gene.CpA0200899.1
gene.CpA0200967.1
gene.CpA0200976.1
gene.CpA0200985.1
gene.CpA0200993.1
gene.CpA0200994.1
gene.CpA0201005.1
gene.CpA0201010.1
gene.CpA0201016.1
gene.CpA0201053.1
gene.CpA0201116.1
gene.CpA0201117.1
gene.CpA0201164.1
gene.CpA0201208.1
gene.CpA0201229.1
gene.CpA0201293.1
gene.CpA0201375.1
gene.CpA0201398.1
gene.CpA0201455.1
gene.CpA0201457.1
gene.CpA0201458.1
gene.CpA0201461.1
gene.CpA0201469.1
gene.CpA0201471.1
gene.CpA0201543.1
gene.CpA0201554.1
gene.CpA0201560.1
gene.CpA0201565.1
gene.CpA0201600.1
gene.CpA0201683.1
gene.CpA0201689.1
gene.CpA0201703.1
gene.CpA0201722.1
gene.CpA0201725.1
gene.CpA0201740.1
gene.CpA0201749.1
gene.CpA0201754.1
gene.CpA0201755.1
gene.CpA0201756.1
gene.CpA0201760.1
gene.CpA0201793.1
gene.CpA0201851.1
gene.CpA0201861.1
gene.CpA0201866.1
gene.CpA0201964.1
gene.CpA0201974.1
gene.CpA0201979.1
gene.CpA0201983.1
gene.CpA0201984.1
gene.CpA0201985.1
gene.CpA0202076.1
gene.CpA0202108.1
gene.CpA0202120.1
gene.CpA0202133.1
gene.CpA0202146.1
gene.CpA0202147.1
gene.CpA0202156.1
gene.CpA0202157.1
gene.CpA0202160.1
gene.CpA0202171.1
gene.CpA0202180.1
gene.CpA0202181.1
gene.CpA0202188.1
gene.CpA0202192.1
gene.CpA0202193.1
gene.CpA0202208.1
gene.CpA0202211.1
gene.CpA0202236.1
gene.CpA0202248.1
gene.CpA0202283.1
gene.CpA0202311.1
gene.CpA0202343.1
gene.CpA0202348.1
gene.CpA0202358.1
gene.CpA0202361.1
gene.CpA0202374.1
gene.CpA0202384.1
gene.CpA0202386.1
gene.CpA0202387.1
gene.CpA0202392.1
gene.CpA0202425.1
gene.CpA0202453.1
gene.CpA0202454.1
gene.CpA0202460.1
gene.CpA0202472.1
gene.CpA0202478.1
gene.CpA0202492.1
gene.CpA0202499.1
gene.CpA0202500.1
gene.CpA0202643.1
gene.CpA0202662.1
gene.CpA0202680.1
gene.CpA0202682.1
gene.CpA0202820.1
gene.CpA0202848.1
gene.CpA0202981.1
gene.CpA0203011.1
gene.CpA0203053.1
gene.CpA0203075.1
gene.CpA0203104.1
gene.CpA0203128.1
gene.CpA0203138.1
gene.CpA0203142.1
gene.CpA0203160.1
gene.CpA0203188.1
gene.CpA0203203.1
gene.CpA0203233.1
gene.CpA0203286.1
gene.CpA0203294.1
gene.CpA0203315.1
gene.CpA0203320.1
gene.CpA0203348.1
gene.CpA0203354.1
gene.CpA0203374.1
gene.CpA0203396.1
gene.CpA0203436.1
gene.CpA0203466.1
gene.CpA0203473.1
gene.CpA0203503.1
gene.CpA0203520.1
gene.CpA0203521.1
gene.CpA0203543.1
gene.CpA0203584.1
gene.CpA0203600.1
gene.CpA0203771.1
gene.CpA0203780.1
gene.CpA0203923.1
gene.CpA0203933.1
gene.CpA0204086.1
gene.CpA0204137.1
gene.CpA0204164.1
gene.CpA0204166.1
gene.CpA0204176.1
gene.CpA0204223.1
gene.CpA0204234.1
gene.CpA0204244.1
gene.CpA0204258.1
gene.CpA0204262.1
gene.CpA0204307.1
gene.CpA0204308.1
gene.CpA0204315.1
gene.CpA0204321.1
gene.CpA0204342.1
gene.CpA0204343.1
gene.CpA0204411.1
gene.CpA0204417.1
gene.CpA0204439.1
gene.CpA0204440.1
gene.CpA0204449.1
gene.CpA0204464.1
gene.CpA0204574.1
gene.CpA0204626.1
gene.CpA0204671.1
gene.CpA0300058.1
gene.CpA0300094.1
gene.CpA0300136.1
gene.CpA0300143.1
gene.CpA0300198.1
gene.CpA0300199.1
gene.CpA0300243.1
gene.CpA0300254.1
gene.CpA0300263.1
gene.CpA0300441.1
gene.CpA0300499.1
gene.CpA0300508.1
gene.CpA0300515.1
gene.CpA0300565.1
gene.CpA0300582.1
gene.CpA0300599.1
gene.CpA0300601.1
gene.CpA0300610.1
gene.CpA0300642.1
gene.CpA0300663.1
gene.CpA0300683.1
gene.CpA0300691.1
gene.CpA0300708.1
gene.CpA0300721.1
gene.CpA0300737.1
gene.CpA0300740.1
gene.CpA0300754.1
gene.CpA0301019.1
gene.CpA0301026.1
gene.CpA0301027.1
gene.CpA0301034.1
gene.CpA0301035.1
gene.CpA0301039.1
gene.CpA0301043.1
gene.CpA0301113.1
gene.CpA0301114.1
gene.CpA0301126.1
gene.CpA0301239.1
gene.CpA0301240.1
gene.CpA0301251.1
gene.CpA0301265.1
gene.CpA0301279.1
gene.CpA0301287.1
gene.CpA0301376.1
gene.CpA0301395.1
gene.CpA0301461.1
gene.CpA0301487.1
gene.CpA0301495.1
gene.CpA0301499.1
gene.CpA0301501.1
gene.CpA0301517.1
gene.CpA0301530.1
gene.CpA0301556.1
gene.CpA0301650.1
gene.CpA0301674.1
gene.CpA0301682.1
gene.CpA0301690.1
gene.CpA0301720.1
gene.CpA0301764.1
gene.CpA0301773.1
gene.CpA0301781.1
gene.CpA0301801.1
gene.CpA0301830.1
gene.CpA0301832.1
gene.CpA0301862.1
gene.CpA0301898.1
gene.CpA0301977.1
gene.CpA0301984.1
gene.CpA0301997.1
gene.CpA0301998.1
gene.CpA0302018.1
gene.CpA0302031.1
gene.CpA0302127.1
gene.CpA0302150.1
gene.CpA0302196.1
gene.CpA0302303.1
gene.CpA0302379.1
gene.CpA0302416.1
gene.CpA0302473.1
gene.CpA0302495.1
gene.CpA0302512.1
gene.CpA0302537.1
gene.CpA0302589.1
gene.CpA0302651.1
gene.CpA0302662.1
gene.CpA0302663.1
gene.CpA0302664.1
gene.CpA0302665.1
gene.CpA0302666.1
gene.CpA0302694.1
gene.CpA0302724.1
gene.CpA0302774.1
gene.CpA0302788.1
gene.CpA0302813.1
gene.CpA0302824.1
gene.CpA0302837.1
gene.CpA0302926.1
gene.CpA0302945.1
gene.CpA0302970.1
gene.CpA0303004.1
gene.CpA0303018.1
gene.CpA0303066.1
gene.CpA0303162.1
gene.CpA0303183.1
gene.CpA0303200.1
gene.CpA0303221.1
gene.CpA0303224.1
gene.CpA0303247.1
gene.CpA0303301.1
gene.CpA0303356.1
gene.CpA0303364.1
gene.CpA0303418.1
gene.CpA0303429.1
gene.CpA0303524.1
gene.CpA0303595.1
gene.CpA0303642.1
gene.CpA0303643.1
gene.CpA0303794.1
gene.CpA0303800.1
gene.CpA0303802.1
gene.CpA0303808.1
gene.CpA0303853.1
gene.CpA0303854.1
gene.CpA0303866.1
gene.CpA0303944.1
gene.CpA0303945.1
gene.CpA0303954.1
gene.CpA0303998.1
gene.CpA0304033.1
gene.CpA0304081.1
gene.CpA0304093.1
gene.CpA0304117.1
gene.CpA0304123.1
gene.CpA0304162.1
gene.CpA0304209.1
gene.CpA0304220.1
gene.CpA0304221.1
gene.CpA0400036.1
gene.CpA0400058.1
gene.CpA0400065.1
gene.CpA0400069.1
gene.CpA0400074.1
gene.CpA0400079.1
gene.CpA0400099.1
gene.CpA0400100.1
gene.CpA0400101.1
gene.CpA0400102.1
gene.CpA0400109.1
gene.CpA0400165.1
gene.CpA0400166.1
gene.CpA0400270.1
gene.CpA0400294.1
gene.CpA0400334.1
gene.CpA0400359.1
gene.CpA0400360.1
gene.CpA0400395.1
gene.CpA0400447.1
gene.CpA0400455.1
gene.CpA0400513.1
gene.CpA0400524.1
gene.CpA0400637.1
gene.CpA0400641.1
gene.CpA0400733.1
gene.CpA0400745.1
gene.CpA0400764.1
gene.CpA0400797.1
gene.CpA0400812.1
gene.CpA0400828.1
gene.CpA0400885.1
gene.CpA0400893.1
gene.CpA0400900.1
gene.CpA0400995.1
gene.CpA0401024.1
gene.CpA0401064.1
gene.CpA0401099.1
gene.CpA0401117.1
gene.CpA0401135.1
gene.CpA0401147.1
gene.CpA0401206.1
gene.CpA0401216.1
gene.CpA0401223.1
gene.CpA0401224.1
gene.CpA0401234.1
gene.CpA0401260.1
gene.CpA0401263.1
gene.CpA0401312.1
gene.CpA0401325.1
gene.CpA0401330.1
gene.CpA0401331.1
gene.CpA0401364.1
gene.CpA0401405.1
gene.CpA0401451.1
gene.CpA0401488.1
gene.CpA0401495.1
gene.CpA0401516.1
gene.CpA0401519.1
gene.CpA0401527.1
gene.CpA0401623.1
gene.CpA0401632.1
gene.CpA0401638.1
gene.CpA0401640.1
gene.CpA0401723.1
gene.CpA0401734.1
gene.CpA0401777.1
gene.CpA0401792.1
gene.CpA0401804.1
gene.CpA0401815.1
gene.CpA0401863.1
gene.CpA0401873.1
gene.CpA0401877.1
gene.CpA0401882.1
gene.CpA0401933.1
gene.CpA0401968.1
gene.CpA0401976.1
gene.CpA0401996.1
gene.CpA0402009.1
gene.CpA0402028.1
gene.CpA0402029.1
gene.CpA0402033.1
gene.CpA0402035.1
gene.CpA0402044.1
gene.CpA0402057.1
gene.CpA0402094.1
gene.CpA0402095.1
gene.CpA0402120.1
gene.CpA0402125.1
gene.CpA0402139.1
gene.CpA0402152.1
gene.CpA0402177.1
gene.CpA0402195.1
gene.CpA0402203.1
gene.CpA0402241.1
gene.CpA0402272.1
gene.CpA0402286.1
gene.CpA0402309.1
gene.CpA0402310.1
gene.CpA0402316.1
gene.CpA0402325.1
gene.CpA0402352.1
gene.CpA0402446.1
gene.CpA0402448.1
gene.CpA0402473.1
gene.CpA0402482.1
gene.CpA0402503.1
gene.CpA0402536.1
gene.CpA0402545.1
gene.CpA0402582.1
gene.CpA0402583.1
gene.CpA0402585.1
gene.CpA0402619.1
gene.CpA0402661.1
gene.CpA0402704.1
gene.CpA0402714.1
gene.CpA0402719.1
gene.CpA0402732.1
gene.CpA0402740.1
gene.CpA0402768.1
gene.CpA0402827.1
gene.CpA0402837.1
gene.CpA0402904.1
gene.CpA0402915.1
gene.CpA0402916.1
gene.CpA0402937.1
gene.CpA0402957.1
gene.CpA0403002.1
gene.CpA0403018.1
gene.CpA0403070.1
gene.CpA0403093.1
gene.CpA0403105.1
gene.CpA0403112.1
gene.CpA0403120.1
gene.CpA0403121.1
gene.CpA0403165.1
gene.CpA0403231.1
gene.CpA0403236.1
gene.CpA0403314.1
gene.CpA0403332.1
gene.CpA0403401.1
gene.CpA0403483.1
gene.CpA0403486.1
gene.CpA0403513.1
gene.CpA0403531.1
gene.CpA0403543.1
gene.CpA0403548.1
gene.CpA0403678.1
gene.CpA0403681.1
gene.CpA0403682.1
gene.CpA0403700.1
gene.CpA0403710.1
gene.CpA0403720.1
gene.CpA0403730.1
gene.CpA0403773.1
gene.CpA0403778.1
gene.CpA0403782.1
gene.CpA0403784.1
gene.CpA0403857.1
gene.CpA0403897.1
gene.CpA0403942.1
gene.CpA0403957.1
gene.CpA0404056.1
gene.CpA0404072.1
gene.CpA0404078.1
gene.CpA0404079.1
gene.CpA0404080.1
gene.CpA0404081.1
gene.CpA0404149.1
gene.CpA0404150.1
gene.CpA0404170.1
gene.CpA0404172.1
gene.CpA0404178.1
gene.CpA0404188.1
gene.CpA0404228.1
gene.CpA0404294.1
gene.CpA0404313.1
gene.CpA0404330.1
gene.CpA0404337.1
gene.CpA0404345.1
gene.CpA0404391.1
gene.CpA0404392.1
gene.CpA0404402.1
gene.CpA0404405.1
gene.CpA0404415.1
gene.CpA0404441.1
gene.CpA0404445.1
gene.CpA0404474.1
gene.CpA0404479.1
gene.CpA0404497.1
gene.CpA0404523.1
gene.CpA0404528.1
gene.CpA0404546.1
gene.CpA0404561.1
gene.CpA0404573.1
gene.CpA0404590.1
gene.CpA0404616.1
gene.CpA0404643.1
gene.CpA0404646.1
gene.CpA0404657.1
gene.CpA0404669.1
gene.CpA0404671.1
gene.CpA0404679.1
gene.CpA0404693.1
gene.CpA0404695.1
gene.CpA0404705.1
gene.CpA0404706.1
gene.CpA0404714.1
gene.CpA0404716.1
gene.CpA0404720.1
gene.CpA0404726.1
gene.CpA0404731.1
gene.CpA0404786.1
gene.CpA0404839.1
gene.CpA0404900.1
gene.CpA0404905.1
gene.CpA0404914.1
gene.CpA0404932.1
gene.CpA0404933.1
gene.CpA0404934.1
gene.CpA0404947.1
gene.CpA0404980.1
gene.CpA0404991.1
gene.CpA0405003.1
gene.CpA0405004.1
gene.CpA0405009.1
gene.CpA0405019.1
gene.CpA0405027.1
gene.CpA0405040.1
gene.CpA0405083.1
gene.CpA0405124.1
gene.CpA0405128.1
gene.CpA0405130.1
gene.CpA0405144.1
gene.CpA0405161.1
gene.CpA0405172.1
gene.CpA0405180.1
gene.CpA0405183.1
gene.CpA0405213.1
gene.CpA0405260.1
gene.CpA0405292.1
gene.CpA0405310.1
gene.CpA0405333.1
gene.CpA0405393.1
gene.CpA0405424.1
gene.CpA0405510.1
gene.CpA0405532.1
gene.CpA0405535.1
gene.CpA0405536.1
gene.CpA0405556.1
gene.CpA0405588.1
gene.CpA0405610.1
gene.CpA0405629.1
gene.CpA0405661.1
gene.CpA0405669.1
gene.CpA0405680.1
gene.CpA0405714.1
gene.CpA0405728.1
gene.CpA0405735.1
gene.CpA0405742.1
gene.CpA0405751.1
gene.CpA0405777.1
gene.CpA0405791.1
gene.CpA0405803.1
gene.CpA0405816.1
gene.CpA0405843.1
gene.CpA0405854.1
gene.CpA0405893.1
gene.CpA0500029.1
gene.CpA0500070.1
gene.CpA0500071.1
gene.CpA0500103.1
gene.CpA0500108.1
gene.CpA0500118.1
gene.CpA0500150.1
gene.CpA0500151.1
gene.CpA0500157.1
gene.CpA0500161.1
gene.CpA0500188.1
gene.CpA0500243.1
gene.CpA0500254.1
gene.CpA0500296.1
gene.CpA0500307.1
gene.CpA0500371.1
gene.CpA0500381.1
gene.CpA0500387.1
gene.CpA0500398.1
gene.CpA0500409.1
gene.CpA0500466.1
gene.CpA0500479.1
gene.CpA0500500.1
gene.CpA0500535.1
gene.CpA0500587.1
gene.CpA0500614.1
gene.CpA0500616.1
gene.CpA0500732.1
gene.CpA0500770.1
gene.CpA0500786.1
gene.CpA0500814.1
gene.CpA0500832.1
gene.CpA0500865.1
gene.CpA0500866.1
gene.CpA0500872.1
gene.CpA0500877.1
gene.CpA0500883.1
gene.CpA0500892.1
gene.CpA0500919.1
gene.CpA0500920.1
gene.CpA0500926.1
gene.CpA0500928.1
gene.CpA0500964.1
gene.CpA0501002.1
gene.CpA0501005.1
gene.CpA0501011.1
gene.CpA0501017.1
gene.CpA0501066.1
gene.CpA0501067.1
gene.CpA0501081.1
gene.CpA0501092.1
gene.CpA0501095.1
gene.CpA0501103.1
gene.CpA0501109.1
gene.CpA0501111.1
gene.CpA0501119.1
gene.CpA0501138.1
gene.CpA0501141.1
gene.CpA0501149.1
gene.CpA0501151.1
gene.CpA0501181.1
gene.CpA0501258.1
gene.CpA0501293.1
gene.CpA0501297.1
gene.CpA0501302.1
gene.CpA0501328.1
gene.CpA0501344.1
gene.CpA0501349.1
gene.CpA0501361.1
gene.CpA0501367.1
gene.CpA0501375.1
gene.CpA0501383.1
gene.CpA0501396.1
gene.CpA0501405.1
gene.CpA0501417.1
gene.CpA0501450.1
gene.CpA0501459.1
gene.CpA0501500.1
gene.CpA0501514.1
gene.CpA0501561.1
gene.CpA0501565.1
gene.CpA0501566.1
gene.CpA0501574.1
gene.CpA0501578.1
gene.CpA0501579.1
gene.CpA0501609.1
gene.CpA0501611.1
gene.CpA0501682.1
gene.CpA0501714.1
gene.CpA0501715.1
gene.CpA0501722.1
gene.CpA0501744.1
gene.CpA0501759.1
gene.CpA0501769.1
gene.CpA0501788.1
gene.CpA0501847.1
gene.CpA0501848.1
gene.CpA0501869.1
gene.CpA0501994.1
gene.CpA0502005.1
gene.CpA0502048.1
gene.CpA0502074.1
gene.CpA0502094.1
gene.CpA0502105.1
gene.CpA0502106.1
gene.CpA0502110.1
gene.CpA0502119.1
gene.CpA0502145.1
gene.CpA0502146.1
gene.CpA0502173.1
gene.CpA0502174.1
gene.CpA0502175.1
gene.CpA0502187.1
gene.CpA0502204.1
gene.CpA0502205.1
gene.CpA0502233.1
gene.CpA0502240.1
gene.CpA0502248.1
gene.CpA0502256.1
gene.CpA0502258.1
gene.CpA0502273.1
gene.CpA0502296.1
gene.CpA0502333.1
gene.CpA0502335.1
gene.CpA0502354.1
gene.CpA0502356.1
gene.CpA0502388.1
gene.CpA0502389.1
gene.CpA0502390.1
gene.CpA0502391.1
gene.CpA0502411.1
gene.CpA0502432.1
gene.CpA0502450.1
gene.CpA0502451.1
gene.CpA0502454.1
gene.CpA0502468.1
gene.CpA0502587.1
gene.CpA0502678.1
gene.CpA0502698.1
gene.CpA0502699.1
gene.CpA0502713.1
gene.CpA0502763.1
gene.CpA0502870.1
gene.CpA0502884.1
gene.CpA0502913.1
gene.CpA0502919.1
gene.CpA0502929.1
gene.CpA0502938.1
gene.CpA0502941.1
gene.CpA0502942.1
gene.CpA0502951.1
gene.CpA0502959.1
gene.CpA0503071.1
gene.CpA0503213.1
gene.CpA0503221.1
gene.CpA0503247.1
gene.CpA0503256.1
gene.CpA0503274.1
gene.CpA0503285.1
gene.CpA0503297.1
gene.CpA0503298.1
gene.CpA0503309.1
gene.CpA0503373.1
gene.CpA0503374.1
gene.CpA0503402.1
gene.CpA0503461.1
gene.CpA0503474.1
gene.CpA0503481.1
gene.CpA0503523.1
gene.CpA0503538.1
gene.CpA0503569.1
gene.CpA0503583.1
gene.CpA0503608.1
gene.CpA0503625.1
gene.CpA0503645.1
gene.CpA0503661.1
gene.CpA0503695.1
gene.CpA0503719.1
gene.CpA0503720.1
gene.CpA0503750.1
gene.CpA0503773.1
gene.CpA0503787.1
gene.CpA0503798.1
gene.CpA0503808.1
gene.CpA0503836.1
gene.CpA0503843.1
gene.CpA0503849.1
gene.CpA0503861.1
gene.CpA0503875.1
gene.CpA0503881.1
gene.CpA0503887.1
gene.CpA0503891.1
gene.CpA0503899.1
gene.CpA0503935.1
gene.CpA0503936.1
gene.CpA0503943.1
gene.CpA0503953.1
gene.CpA0503986.1
gene.CpA0503990.1
gene.CpA0504004.1
gene.CpA0504032.1
gene.CpA0504035.1
gene.CpA0504052.1
gene.CpA0504056.1
gene.CpA0504060.1
gene.CpA0504075.1
gene.CpA0504089.1
gene.CpA0504115.1
gene.CpA0504127.1
gene.CpA0504134.1
gene.CpA0504144.1
gene.CpA0504153.1
gene.CpA0504160.1
gene.CpA0504185.1
gene.CpA0504187.1
gene.CpA0504192.1
gene.CpA0504196.1
gene.CpA0504197.1
gene.CpA0504208.1
gene.CpA0504214.1
gene.CpA0504226.1
gene.CpA0504233.1
gene.CpA0504247.1
gene.CpA0504249.1
gene.CpA0504264.1
gene.CpA0504280.1
gene.CpA0504287.1
gene.CpA0504291.1
gene.CpA0504301.1
gene.CpA0504381.1
gene.CpA0504393.1
gene.CpA0504395.1
gene.CpA0504396.1
gene.CpA0504424.1
gene.CpA0504425.1
gene.CpA0504490.1
gene.CpA0504514.1
gene.CpA0504523.1
gene.CpA0504528.1
gene.CpA0504540.1
gene.CpA0504551.1
gene.CpA0504552.1
gene.CpA0504572.1
gene.CpA0504576.1
gene.CpA0504590.1
gene.CpA0504592.1
gene.CpA0504607.1
gene.CpA0504611.1
gene.CpA0504667.1
gene.CpA0504670.1
gene.CpA0504685.1
gene.CpA0504686.1
gene.CpA0504697.1
gene.CpA0504698.1
gene.CpA0504704.1
gene.CpA0504711.1
gene.CpA0504721.1
gene.CpA0504725.1
gene.CpA0504736.1
gene.CpA0504755.1
gene.CpA0504765.1
gene.CpA0504766.1
gene.CpA0504771.1
gene.CpA0504802.1
gene.CpA0504805.1
gene.CpA0504813.1
gene.CpA0504822.1
gene.CpA0504931.1
gene.CpA0505014.1
gene.CpA0505020.1
gene.CpA0505054.1
gene.CpA0505078.1
gene.CpA0505141.1
gene.CpA0505178.1
gene.CpA0505233.1
gene.CpA0505252.1
gene.CpA0505272.1
gene.CpA0600045.1
gene.CpA0600069.1
gene.CpA0600070.1
gene.CpA0600099.1
gene.CpA0600125.1
gene.CpA0600139.1
gene.CpA0600146.1
gene.CpA0600156.1
gene.CpA0600166.1
gene.CpA0600180.1
gene.CpA0600227.1
gene.CpA0600287.1
gene.CpA0600290.1
gene.CpA0600291.1
gene.CpA0600403.1
gene.CpA0600419.1
gene.CpA0600435.1
gene.CpA0600451.1
gene.CpA0600456.1
gene.CpA0600468.1
gene.CpA0600471.1
gene.CpA0600490.1
gene.CpA0600503.1
gene.CpA0600519.1
gene.CpA0600549.1
gene.CpA0600560.1
gene.CpA0600563.1
gene.CpA0600567.1
gene.CpA0600569.1
gene.CpA0600573.1
gene.CpA0600581.1
gene.CpA0600589.1
gene.CpA0600602.1
gene.CpA0600604.1
gene.CpA0600606.1
gene.CpA0600613.1
gene.CpA0600616.1
gene.CpA0600619.1
gene.CpA0600643.1
gene.CpA0600656.1
gene.CpA0600657.1
gene.CpA0600675.1
gene.CpA0600687.1
gene.CpA0600726.1
gene.CpA0600741.1
gene.CpA0600749.1
gene.CpA0600761.1
gene.CpA0600796.1
gene.CpA0600806.1
gene.CpA0600807.1
gene.CpA0600860.1
gene.CpA0600876.1
gene.CpA0600880.1
gene.CpA0600896.1
gene.CpA0600967.1
gene.CpA0600991.1
gene.CpA0601001.1
gene.CpA0601002.1
gene.CpA0601012.1
gene.CpA0601035.1
gene.CpA0601041.1
gene.CpA0601053.1
gene.CpA0601111.1
gene.CpA0601121.1
gene.CpA0601156.1
gene.CpA0601171.1
gene.CpA0601192.1
gene.CpA0601220.1
gene.CpA0601223.1
gene.CpA0601234.1
gene.CpA0601278.1
gene.CpA0601282.1
gene.CpA0601297.1
gene.CpA0601308.1
gene.CpA0601313.1
gene.CpA0601316.1
gene.CpA0601355.1
gene.CpA0601389.1
gene.CpA0601390.1
gene.CpA0601392.1
gene.CpA0601441.1
gene.CpA0601444.1
gene.CpA0601446.1
gene.CpA0601473.1
gene.CpA0601494.1
gene.CpA0601497.1
gene.CpA0601504.1
gene.CpA0601527.1
gene.CpA0601556.1
gene.CpA0601560.1
gene.CpA0601565.1
gene.CpA0601595.1
gene.CpA0601597.1
gene.CpA0601602.1
gene.CpA0601706.1
gene.CpA0601724.1
gene.CpA0601743.1
gene.CpA0601773.1
gene.CpA0601801.1
gene.CpA0601804.1
gene.CpA0601862.1
gene.CpA0601868.1
gene.CpA0601967.1
gene.CpA0601980.1
gene.CpA0601984.1
gene.CpA0601986.1
gene.CpA0602004.1
gene.CpA0602021.1
gene.CpA0602039.1
gene.CpA0602067.1
gene.CpA0602092.1
gene.CpA0602103.1
gene.CpA0602105.1
gene.CpA0602114.1
gene.CpA0602129.1
gene.CpA0602138.1
gene.CpA0602170.1
gene.CpA0602180.1
gene.CpA0602202.1
gene.CpA0602210.1
gene.CpA0602227.1
gene.CpA0602230.1
gene.CpA0602234.1
gene.CpA0602238.1
gene.CpA0602248.1
gene.CpA0602249.1
gene.CpA0602286.1
gene.CpA0602291.1
gene.CpA0602292.1
gene.CpA0602293.1
gene.CpA0602298.1
gene.CpA0602311.1
gene.CpA0602321.1
gene.CpA0602374.1
gene.CpA0602381.1
gene.CpA0602447.1
gene.CpA0602453.1
gene.CpA0602460.1
gene.CpA0602474.1
gene.CpA0602495.1
gene.CpA0602568.1
gene.CpA0602609.1
gene.CpA0602616.1
gene.CpA0602618.1
gene.CpA0602636.1
gene.CpA0602712.1
gene.CpA0602726.1
gene.CpA0602732.1
gene.CpA0602756.1
gene.CpA0602810.1
gene.CpA0602852.1
gene.CpA0602856.1
gene.CpA0602867.1
gene.CpA0602920.1
gene.CpA0602926.1
gene.CpA0602963.1
gene.CpA0603010.1
gene.CpA0603020.1
gene.CpA0603037.1
gene.CpA0603053.1
gene.CpA0603074.1
gene.CpA0603125.1
gene.CpA0603176.1
gene.CpA0603177.1
gene.CpA0603196.1
gene.CpA0603198.1
gene.CpA0603199.1
gene.CpA0603244.1
gene.CpA0603264.1
gene.CpA0603299.1
gene.CpA0603308.1
gene.CpA0603325.1
gene.CpA0603391.1
gene.CpA0603401.1
gene.CpA0603409.1
gene.CpA0603473.1
gene.CpA0603500.1
gene.CpA0603501.1
gene.CpA0603502.1
gene.CpA0603524.1
gene.CpA0603538.1
gene.CpA0603544.1
gene.CpA0603553.1
gene.CpA0603591.1
gene.CpA0603599.1
gene.CpA0603664.1
gene.CpA0603702.1
gene.CpA0603725.1
gene.CpA0603734.1
gene.CpA0603755.1
gene.CpA0603769.1
gene.CpA0603770.1
gene.CpA0603772.1
gene.CpA0603835.1
gene.CpA0603838.1
gene.CpA0603850.1
gene.CpA0603852.1
gene.CpA0603853.1
gene.CpA0603854.1
gene.CpA0603879.1
gene.CpA0603910.1
gene.CpA0603912.1
gene.CpA0603913.1
gene.CpA0603915.1
gene.CpA0603917.1
gene.CpA0603938.1
gene.CpA0603983.1
gene.CpA0604010.1
gene.CpA0604038.1
gene.CpA0700001.1
gene.CpA0700065.1
gene.CpA0700075.1
gene.CpA0700175.1
gene.CpA0700200.1
gene.CpA0700218.1
gene.CpA0700268.1
gene.CpA0700365.1
gene.CpA0700367.1
gene.CpA0700368.1
gene.CpA0700417.1
gene.CpA0700455.1
gene.CpA0700460.1
gene.CpA0700529.1
gene.CpA0700576.1
gene.CpA0700625.1
gene.CpA0700628.1
gene.CpA0700633.1
gene.CpA0700636.1
gene.CpA0700648.1
gene.CpA0700673.1
gene.CpA0700687.1
gene.CpA0700693.1
gene.CpA0700694.1
gene.CpA0700695.1
gene.CpA0700705.1
gene.CpA0700715.1
gene.CpA0700760.1
gene.CpA0700762.1
gene.CpA0700778.1
gene.CpA0700785.1
gene.CpA0700797.1
gene.CpA0700804.1
gene.CpA0700829.1
gene.CpA0700870.1
gene.CpA0700873.1
gene.CpA0700879.1
gene.CpA0700880.1
gene.CpA0700895.1
gene.CpA0700896.1
gene.CpA0700897.1
gene.CpA0700904.1
gene.CpA0700905.1
gene.CpA0700914.1
gene.CpA0700988.1
gene.CpA0700991.1
gene.CpA0700994.1
gene.CpA0701034.1
gene.CpA0701037.1
gene.CpA0701046.1
gene.CpA0701051.1
gene.CpA0701056.1
gene.CpA0701057.1
gene.CpA0701065.1
gene.CpA0701071.1
gene.CpA0701133.1
gene.CpA0701181.1
gene.CpA0701190.1
gene.CpA0701191.1
gene.CpA0701199.1
gene.CpA0701203.1
gene.CpA0701217.1
gene.CpA0701218.1
gene.CpA0701224.1
gene.CpA0701228.1
gene.CpA0701233.1
gene.CpA0701237.1
gene.CpA0701247.1
gene.CpA0701248.1
gene.CpA0701254.1
gene.CpA0701268.1
gene.CpA0701282.1
gene.CpA0701283.1
gene.CpA0701324.1
gene.CpA0701363.1
gene.CpA0701396.1
gene.CpA0701412.1
gene.CpA0701415.1
gene.CpA0701416.1
gene.CpA0701430.1
gene.CpA0701432.1
gene.CpA0701439.1
gene.CpA0701449.1
gene.CpA0701479.1
gene.CpA0701496.1
gene.CpA0701546.1
gene.CpA0701581.1
gene.CpA0701610.1
gene.CpA0701654.1
gene.CpA0701659.1
gene.CpA0701678.1
gene.CpA0701693.1
gene.CpA0701697.1
gene.CpA0701719.1
gene.CpA0701741.1
gene.CpA0701758.1
gene.CpA0701769.1
gene.CpA0701774.1
gene.CpA0701779.1
gene.CpA0701791.1
gene.CpA0701797.1
gene.CpA0701807.1
gene.CpA0701808.1
gene.CpA0701814.1
gene.CpA0701838.1
gene.CpA0701840.1
gene.CpA0701870.1
gene.CpA0701892.1
gene.CpA0701913.1
gene.CpA0701937.1
gene.CpA0701945.1
gene.CpA0701949.1
gene.CpA0701979.1
gene.CpA0702007.1
gene.CpA0702025.1
gene.CpA0702026.1
gene.CpA0702028.1
gene.CpA0702037.1
gene.CpA0702046.1
gene.CpA0702048.1
gene.CpA0702049.1
gene.CpA0702050.1
gene.CpA0702062.1
gene.CpA0702140.1
gene.CpA0702152.1
gene.CpA0702188.1
gene.CpA0702215.1
gene.CpA0702217.1
gene.CpA0702225.1
gene.CpA0702263.1
gene.CpA0702303.1
gene.CpA0702304.1
gene.CpA0702329.1
gene.CpA0702352.1
gene.CpA0702392.1
gene.CpA0702402.1
gene.CpA0702406.1
gene.CpA0702408.1
gene.CpA0702416.1
gene.CpA0702441.1
gene.CpA0702446.1
gene.CpA0702453.1
gene.CpA0702535.1
gene.CpA0702536.1
gene.CpA0702575.1
gene.CpA0702622.1
gene.CpA0702628.1
gene.CpA0702676.1
gene.CpA0702685.1
gene.CpA0702698.1
gene.CpA0702781.1
gene.CpA0702795.1
gene.CpA0702844.1
gene.CpA0702856.1
gene.CpA0702860.1
gene.CpA0702877.1
gene.CpA0702892.1
gene.CpA0702949.1
gene.CpA0702951.1
gene.CpA0702971.1
gene.CpA0702989.1
gene.CpA0703051.1
gene.CpA0703055.1
gene.CpA0703061.1
gene.CpA0703099.1
gene.CpA0703113.1
gene.CpA0703164.1
gene.CpA0703169.1
gene.CpA0703204.1
gene.CpA0703212.1
gene.CpA0703250.1
gene.CpA0703297.1
gene.CpA0703305.1
gene.CpA0703401.1
gene.CpA0703466.1
gene.CpA0703487.1
gene.CpA0703493.1
gene.CpA0703494.1
gene.CpA0703522.1
gene.CpA0703609.1
gene.CpA0703614.1
gene.CpA0703661.1
gene.CpA0703707.1
gene.CpA0703713.1
gene.CpA0703732.1
gene.CpA0703743.1
gene.CpA0703783.1
gene.CpA0703793.1
gene.CpA0703825.1
gene.CpA0703830.1
gene.CpA0703853.1
gene.CpA0703874.1
gene.CpA0703877.1
gene.CpA0703879.1
gene.CpA0703936.1
gene.CpA0703972.1
gene.CpA0703983.1
gene.CpA0703984.1
gene.CpA0704022.1
gene.CpA0704024.1
gene.CpA0704028.1
gene.CpA0704029.1
gene.CpA0704052.1
gene.CpA0704067.1
gene.CpA0704096.1
gene.CpA0704101.1
gene.CpA0704134.1
gene.CpA0704187.1
gene.CpA0704191.1
gene.CpA0704193.1
gene.CpA0704194.1
gene.CpA0704204.1
gene.CpA0704216.1
gene.CpA0704266.1
gene.CpA0704325.1
gene.CpA0704327.1
gene.CpA0704330.1
gene.CpB0100007.1
gene.CpB0100036.1
gene.CpB0100074.1
gene.CpB0100080.1
gene.CpB0100091.1
gene.CpB0100131.1
gene.CpB0100175.1
gene.CpB0100239.1
gene.CpB0100322.1
gene.CpB0100337.1
gene.CpB0100405.1
gene.CpB0100406.1
gene.CpB0100418.1
gene.CpB0100422.1
gene.CpB0100598.1
gene.CpB0100611.1
gene.CpB0100629.1
gene.CpB0100631.1
gene.CpB0100632.1
gene.CpB0100670.1
gene.CpB0100736.1
gene.CpB0100752.1
gene.CpB0100764.1
gene.CpB0100842.1
gene.CpB0100873.1
gene.CpB0100884.1
gene.CpB0100887.1
gene.CpB0100909.1
gene.CpB0100917.1
gene.CpB0100924.1
gene.CpB0101023.1
gene.CpB0101042.1
gene.CpB0101085.1
gene.CpB0101091.1
gene.CpB0101116.1
gene.CpB0101153.1
gene.CpB0101166.1
gene.CpB0101242.1
gene.CpB0101293.1
gene.CpB0101302.1
gene.CpB0101303.1
gene.CpB0101346.1
gene.CpB0101364.1
gene.CpB0101365.1
gene.CpB0101375.1
gene.CpB0101380.1
gene.CpB0101381.1
gene.CpB0101382.1
gene.CpB0101544.1
gene.CpB0101545.1
gene.CpB0101593.1
gene.CpB0101596.1
gene.CpB0101630.1
gene.CpB0101723.1
gene.CpB0101747.1
gene.CpB0101805.1
gene.CpB0101823.1
gene.CpB0101831.1
gene.CpB0101877.1
gene.CpB0101952.1
gene.CpB0101975.1
gene.CpB0102068.1
gene.CpB0102074.1
gene.CpB0102113.1
gene.CpB0102126.1
gene.CpB0102129.1
gene.CpB0102143.1
gene.CpB0102158.1
gene.CpB0102166.1
gene.CpB0102175.1
gene.CpB0102207.1
gene.CpB0102208.1
gene.CpB0102209.1
gene.CpB0102224.1
gene.CpB0102233.1
gene.CpB0102257.1
gene.CpB0102273.1
gene.CpB0102277.1
gene.CpB0102291.1
gene.CpB0102302.1
gene.CpB0102303.1
gene.CpB0102314.1
gene.CpB0102333.1
gene.CpB0102340.1
gene.CpB0102394.1
gene.CpB0102430.1
gene.CpB0102464.1
gene.CpB0102477.1
gene.CpB0102488.1
gene.CpB0102516.1
gene.CpB0102539.1
gene.CpB0102558.1
gene.CpB0102613.1
gene.CpB0102640.1
gene.CpB0102641.1
gene.CpB0102645.1
gene.CpB0102654.1
gene.CpB0102673.1
gene.CpB0102679.1
gene.CpB0102681.1
gene.CpB0102700.1
gene.CpB0102721.1
gene.CpB0102743.1
gene.CpB0102759.1
gene.CpB0102818.1
gene.CpB0102830.1
gene.CpB0102832.1
gene.CpB0102855.1
gene.CpB0102864.1
gene.CpB0102882.1
gene.CpB0102884.1
gene.CpB0102889.1
gene.CpB0102896.1
gene.CpB0102897.1
gene.CpB0102926.1
gene.CpB0102980.1
gene.CpB0102984.1
gene.CpB0103001.1
gene.CpB0103015.1
gene.CpB0103021.1
gene.CpB0103025.1
gene.CpB0103027.1
gene.CpB0103050.1
gene.CpB0103100.1
gene.CpB0103121.1
gene.CpB0103136.1
gene.CpB0103162.1
gene.CpB0103164.1
gene.CpB0103166.1
gene.CpB0103173.1
gene.CpB0103180.1
gene.CpB0103310.1
gene.CpB0103319.1
gene.CpB0103324.1
gene.CpB0103325.1
gene.CpB0103327.1
gene.CpB0103366.1
gene.CpB0103370.1
gene.CpB0103400.1
gene.CpB0103406.1
gene.CpB0103498.1
gene.CpB0103500.1
gene.CpB0103507.1
gene.CpB0103512.1
gene.CpB0103531.1
gene.CpB0103566.1
gene.CpB0103574.1
gene.CpB0103632.1
gene.CpB0103649.1
gene.CpB0103673.1
gene.CpB0103706.1
gene.CpB0103708.1
gene.CpB0103710.1
gene.CpB0103712.1
gene.CpB0103718.1
gene.CpB0103725.1
gene.CpB0103738.1
gene.CpB0103744.1
gene.CpB0103764.1
gene.CpB0103765.1
gene.CpB0103775.1
gene.CpB0103820.1
gene.CpB0103824.1
gene.CpB0103885.1
gene.CpB0103907.1
gene.CpB0103911.1
gene.CpB0103964.1
gene.CpB0103994.1
gene.CpB0104020.1
gene.CpB0104045.1
gene.CpB0104055.1
gene.CpB0104081.1
gene.CpB0104095.1
gene.CpB0104106.1
gene.CpB0104123.1
gene.CpB0104160.1
gene.CpB0104176.1
gene.CpB0104184.1
gene.CpB0104187.1
gene.CpB0104194.1
gene.CpB0104213.1
gene.CpB0104229.1
gene.CpB0104247.1
gene.CpB0104267.1
gene.CpB0104301.1
gene.CpB0104330.1
gene.CpB0104332.1
gene.CpB0104344.1
gene.CpB0104354.1
gene.CpB0104373.1
gene.CpB0104381.1
gene.CpB0104386.1
gene.CpB0104390.1
gene.CpB0104391.1
gene.CpB0104453.1
gene.CpB0104468.1
gene.CpB0104476.1
gene.CpB0104477.1
gene.CpB0104493.1
gene.CpB0104529.1
gene.CpB0104531.1
gene.CpB0104533.1
gene.CpB0104537.1
gene.CpB0104551.1
gene.CpB0104570.1
gene.CpB0104641.1
gene.CpB0104649.1
gene.CpB0104658.1
gene.CpB0104678.1
gene.CpB0104721.1
gene.CpB0104722.1
gene.CpB0104771.1
gene.CpB0104799.1
gene.CpB0104825.1
gene.CpB0104844.1
gene.CpB0104865.1
gene.CpB0104885.1
gene.CpB0104972.1
gene.CpB0104994.1
gene.CpB0105030.1
gene.CpB0105033.1
gene.CpB0105091.1
gene.CpB0105099.1
gene.CpB0105109.1
gene.CpB0105118.1
gene.CpB0105119.1
gene.CpB0105159.1
gene.CpB0105167.1
gene.CpB0105183.1
gene.CpB0105190.1
gene.CpB0105192.1
gene.CpB0105214.1
gene.CpB0105236.1
gene.CpB0105239.1
gene.CpB0105266.1
gene.CpB0105268.1
gene.CpB0105334.1
gene.CpB0105386.1
gene.CpB0105396.1
gene.CpB0105408.1
gene.CpB0105417.1
gene.CpB0105433.1
gene.CpB0105441.1
gene.CpB0105443.1
gene.CpB0105497.1
gene.CpB0105498.1
gene.CpB0105521.1
gene.CpB0105656.1
gene.CpB0105658.1
gene.CpB0105696.1
gene.CpB0105704.1
gene.CpB0105755.1
gene.CpB0105775.1
gene.CpB0105800.1
gene.CpB0105829.1
gene.CpB0105830.1
gene.CpB0105902.1
gene.CpB0105952.1
gene.CpB0105995.1
gene.CpB0105996.1
gene.CpB0106023.1
gene.CpB0106046.1
gene.CpB0106070.1
gene.CpB0106071.1
gene.CpB0106074.1
gene.CpB0106085.1
gene.CpB0106091.1
gene.CpB0106172.1
gene.CpB0106188.1
gene.CpB0106189.1
gene.CpB0106195.1
gene.CpB0106196.1
gene.CpB0200010.1
gene.CpB0200029.1
gene.CpB0200090.1
gene.CpB0200095.1
gene.CpB0200097.1
gene.CpB0200123.1
gene.CpB0200164.1
gene.CpB0200179.1
gene.CpB0200277.1
gene.CpB0200280.1
gene.CpB0200282.1
gene.CpB0200301.1
gene.CpB0200324.1
gene.CpB0200325.1
gene.CpB0200372.1
gene.CpB0200380.1
gene.CpB0200446.1
gene.CpB0200448.1
gene.CpB0200455.1
gene.CpB0200457.1
gene.CpB0200511.1
gene.CpB0200515.1
gene.CpB0200528.1
gene.CpB0200555.1
gene.CpB0200604.1
gene.CpB0200606.1
gene.CpB0200626.1
gene.CpB0200681.1
gene.CpB0200708.1
gene.CpB0200719.1
gene.CpB0200746.1
gene.CpB0200758.1
gene.CpB0200768.1
gene.CpB0200862.1
gene.CpB0200878.1
gene.CpB0200893.1
gene.CpB0200894.1
gene.CpB0200908.1
gene.CpB0200923.1
gene.CpB0200926.1
gene.CpB0200941.1
gene.CpB0200954.1
gene.CpB0200962.1
gene.CpB0200965.1
gene.CpB0200966.1
gene.CpB0200971.1
gene.CpB0201034.1
gene.CpB0201090.1
gene.CpB0201098.1
gene.CpB0201167.1
gene.CpB0201185.1
gene.CpB0201209.1
gene.CpB0201227.1
gene.CpB0201251.1
gene.CpB0201252.1
gene.CpB0201287.1
gene.CpB0201330.1
gene.CpB0201331.1
gene.CpB0201336.1
gene.CpB0201344.1
gene.CpB0201353.1
gene.CpB0201408.1
gene.CpB0201435.1
gene.CpB0201467.1
gene.CpB0201473.1
gene.CpB0201474.1
gene.CpB0201485.1
gene.CpB0201592.1
gene.CpB0201593.1
gene.CpB0201595.1
gene.CpB0201602.1
gene.CpB0201606.1
gene.CpB0201617.1
gene.CpB0201619.1
gene.CpB0201639.1
gene.CpB0201657.1
gene.CpB0201661.1
gene.CpB0201669.1
gene.CpB0201673.1
gene.CpB0201690.1
gene.CpB0201738.1
gene.CpB0201797.1
gene.CpB0201815.1
gene.CpB0201854.1
gene.CpB0201894.1
gene.CpB0201912.1
gene.CpB0201918.1
gene.CpB0201944.1
gene.CpB0202002.1
gene.CpB0202042.1
gene.CpB0202091.1
gene.CpB0202092.1
gene.CpB0202105.1
gene.CpB0202120.1
gene.CpB0202282.1
gene.CpB0202316.1
gene.CpB0202348.1
gene.CpB0202357.1
gene.CpB0202362.1
gene.CpB0202382.1
gene.CpB0202385.1
gene.CpB0202480.1
gene.CpB0202528.1
gene.CpB0202531.1
gene.CpB0202534.1
gene.CpB0202548.1
gene.CpB0202598.1
gene.CpB0202615.1
gene.CpB0202619.1
gene.CpB0202635.1
gene.CpB0202709.1
gene.CpB0202758.1
gene.CpB0202759.1
gene.CpB0202779.1
gene.CpB0202835.1
gene.CpB0202891.1
gene.CpB0202896.1
gene.CpB0202902.1
gene.CpB0202905.1
gene.CpB0202909.1
gene.CpB0202949.1
gene.CpB0202970.1
gene.CpB0203012.1
gene.CpB0203030.1
gene.CpB0203076.1
gene.CpB0203083.1
gene.CpB0203090.1
gene.CpB0203101.1
gene.CpB0203190.1
gene.CpB0203203.1
gene.CpB0203233.1
gene.CpB0203242.1
[truncated: 994 more rows]

## Sheet: magenta
gene id
gene.Cp0000034.1
gene.Cp0000564.1
gene.Cp0000642.1
gene.Cp0000758.1
gene.Cp0001094.1
gene.Cp0001169.1
gene.Cp0001319.1
gene.CpA0100105.1
gene.CpA0100281.1
gene.CpA0100763.1
gene.CpA0100769.1
gene.CpA0100784.1
gene.CpA0100792.1
gene.CpA0100914.1
gene.CpA0100966.1
gene.CpA0101324.1
gene.CpA0101377.1
gene.CpA0101479.1
gene.CpA0101873.1
gene.CpA0102278.1
gene.CpA0102644.1
gene.CpA0102768.1
gene.CpA0103201.1
gene.CpA0103247.1
gene.CpA0103283.1
gene.CpA0103371.1
gene.CpA0103409.1
gene.CpA0104423.1
gene.CpA0104911.1
gene.CpA0104960.1
gene.CpA0105124.1
gene.CpA0105564.1
gene.CpA0200172.1
gene.CpA0200181.1
gene.CpA0200322.1
gene.CpA0200484.1
gene.CpA0200578.1
gene.CpA0200590.1
gene.CpA0201142.1
gene.CpA0201233.1
gene.CpA0201392.1
gene.CpA0201444.1
gene.CpA0201550.1
gene.CpA0201654.1
gene.CpA0202098.1
gene.CpA0202099.1
gene.CpA0202261.1
gene.CpA0202300.1
gene.CpA0202805.1
gene.CpA0202855.1
gene.CpA0203009.1
gene.CpA0203252.1
gene.CpA0203446.1
gene.CpA0203459.1
gene.CpA0203785.1
gene.CpA0204132.1
gene.CpA0204318.1
gene.CpA0204326.1
gene.CpA0300250.1
gene.CpA0300341.1
gene.CpA0300420.1
gene.CpA0300697.1
gene.CpA0301215.1
gene.CpA0301296.1
gene.CpA0301341.1
gene.CpA0301427.1
gene.CpA0301571.1
gene.CpA0301699.1
gene.CpA0301700.1
gene.CpA0301732.1
gene.CpA0302173.1
gene.CpA0302236.1
gene.CpA0302238.1
gene.CpA0302324.1
gene.CpA0302417.1
gene.CpA0302535.1
gene.CpA0302713.1
gene.CpA0302764.1
gene.CpA0303254.1
gene.CpA0303297.1
gene.CpA0303414.1
gene.CpA0303531.1
gene.CpA0303946.1
gene.CpA0304211.1
gene.CpA0400483.1
gene.CpA0400980.1
gene.CpA0401149.1
gene.CpA0401282.1
gene.CpA0401283.1
gene.CpA0401490.1
gene.CpA0401496.1
gene.CpA0402005.1
gene.CpA0402672.1
gene.CpA0402745.1
gene.CpA0403080.1
gene.CpA0403103.1
gene.CpA0403292.1
gene.CpA0403435.1
gene.CpA0403462.1
gene.CpA0403463.1
gene.CpA0403927.1
gene.CpA0404355.1
gene.CpA0404885.1
gene.CpA0405428.1
gene.CpA0405871.1
gene.CpA0405872.1
gene.CpA0405877.1
gene.CpA0500718.1
gene.CpA0500938.1
gene.CpA0500951.1
gene.CpA0501018.1
gene.CpA0501246.1
gene.CpA0501453.1
gene.CpA0501600.1
gene.CpA0501647.1
gene.CpA0501763.1
gene.CpA0501859.1
gene.CpA0502071.1
gene.CpA0502275.1
gene.CpA0502708.1
gene.CpA0502729.1
gene.CpA0502926.1
gene.CpA0503132.1
gene.CpA0503453.1
gene.CpA0503852.1
gene.CpA0503885.1
gene.CpA0504355.1
gene.CpA0505187.1
gene.CpA0600078.1
gene.CpA0600110.1
gene.CpA0600366.1
gene.CpA0600617.1
gene.CpA0600853.1
gene.CpA0600856.1
gene.CpA0600899.1
gene.CpA0600971.1
gene.CpA0601054.1
gene.CpA0601452.1
gene.CpA0601577.1
gene.CpA0601608.1
gene.CpA0601997.1
gene.CpA0602466.1
gene.CpA0602899.1
gene.CpA0603007.1
gene.CpA0603281.1
gene.CpA0603945.1
gene.CpA0700298.1
gene.CpA0700387.1
gene.CpA0700620.1
gene.CpA0700954.1
gene.CpA0701102.1
gene.CpA0701796.1
gene.CpA0701819.1
gene.CpA0702689.1
gene.CpA0702690.1
gene.CpA0702729.1
gene.CpA0703080.1
gene.CpA0703376.1
gene.CpA0704389.1
gene.CpB0100436.1
gene.CpB0100822.1
gene.CpB0100829.1
gene.CpB0100963.1
gene.CpB0101290.1
gene.CpB0101710.1
gene.CpB0101853.1
gene.CpB0102139.1
gene.CpB0102240.1
gene.CpB0102463.1
gene.CpB0102503.1
gene.CpB0102618.1
gene.CpB0102768.1
gene.CpB0102850.1
gene.CpB0102871.1
gene.CpB0103026.1
gene.CpB0103397.1
gene.CpB0103837.1
gene.CpB0103853.1
gene.CpB0104792.1
gene.CpB0104800.1
gene.CpB0105465.1
gene.CpB0105729.1
gene.CpB0105924.1
gene.CpB0200086.1
gene.CpB0200190.1
gene.CpB0200265.1
gene.CpB0200373.1
gene.CpB0200882.1
gene.CpB0200960.1
gene.CpB0200961.1
gene.CpB0201100.1
gene.CpB0201148.1
gene.CpB0201205.1
gene.CpB0201206.1
gene.CpB0201445.1
gene.CpB0201512.1
gene.CpB0201641.1
gene.CpB0202269.1
gene.CpB0202477.1
gene.CpB0202554.1
gene.CpB0202812.1
gene.CpB0203115.1
gene.CpB0203135.1
gene.CpB0203152.1
gene.CpB0203163.1
gene.CpB0203208.1
gene.CpB0203329.1
gene.CpB0203332.1
gene.CpB0203378.1
gene.CpB0203828.1
gene.CpB0203863.1
gene.CpB0204152.1
gene.CpB0205469.1
gene.CpB0205493.1
gene.CpB0205557.1
gene.CpB0205627.1
gene.CpB0300002.1
gene.CpB0300071.1
gene.CpB0300164.1
gene.CpB0300165.1
gene.CpB0300388.1
gene.CpB0300883.1
gene.CpB0300984.1
gene.CpB0301075.1
gene.CpB0301307.1
gene.CpB0301390.1
gene.CpB0301441.1
gene.CpB0301736.1
gene.CpB0301939.1
gene.CpB0301992.1
gene.CpB0302251.1
gene.CpB0302256.1
gene.CpB0302261.1
gene.CpB0302349.1
gene.CpB0302991.1
gene.CpB0303565.1
gene.CpB0303609.1
gene.CpB0400028.1
gene.CpB0400078.1
gene.CpB0400079.1
gene.CpB0400270.1
gene.CpB0400382.1
gene.CpB0400448.1
gene.CpB0400640.1
gene.CpB0401348.1
gene.CpB0401808.1
gene.CpB0401983.1
gene.CpB0402367.1
gene.CpB0402414.1
gene.CpB0402460.1
gene.CpB0402600.1
gene.CpB0403347.1
gene.CpB0403561.1
gene.CpB0403563.1
gene.CpB0403768.1
gene.CpB0500051.1
gene.CpB0500278.1
gene.CpB0500631.1
gene.CpB0500787.1
gene.CpB0500944.1
gene.CpB0501043.1
gene.CpB0501190.1
gene.CpB0501388.1
gene.CpB0501497.1
gene.CpB0501676.1
gene.CpB0501678.1
gene.CpB0501748.1
gene.CpB0501884.1
gene.CpB0501890.1
gene.CpB0501935.1
gene.CpB0502011.1
gene.CpB0502376.1
gene.CpB0503105.1
gene.CpB0503494.1
gene.CpB0503776.1
gene.CpB0600407.1
gene.CpB0600941.1
gene.CpB0600999.1
gene.CpB0601213.1
gene.CpB0601296.1
gene.CpB0601461.1
gene.CpB0602545.1
gene.CpB0603140.1
gene.CpB0603429.1
gene.CpB0700176.1
gene.CpB0700264.1
gene.CpB0700941.1
gene.CpB0701069.1
gene.CpB0701150.1
gene.CpB0701393.1
gene.CpB0701733.1
gene.CpB0702397.1
gene.CpB0702409.1

## Sheet: tan
gene id
gene.Cp0000722.1
gene.Cp0000797.1
gene.Cp0001333.1
gene.CpA0101985.1
gene.CpA0101990.1
gene.CpA0102849.1
gene.CpA0103028.1
gene.CpA0104093.1
gene.CpA0104524.1
gene.CpA0104664.1
gene.CpA0105577.1
gene.CpA0200442.1
gene.CpA0200792.1
gene.CpA0201258.1
gene.CpA0201611.1
gene.CpA0201626.1
gene.CpA0202256.1
gene.CpA0202265.1
gene.CpA0300184.1
gene.CpA0300282.1
gene.CpA0300664.1
gene.CpA0300752.1
gene.CpA0301298.1
gene.CpA0301421.1
gene.CpA0301966.1
gene.CpA0302049.1
gene.CpA0304153.1
gene.CpA0400596.1
gene.CpA0401128.1
gene.CpA0401857.1
gene.CpA0403417.1
gene.CpA0404580.1
gene.CpA0500152.1
gene.CpA0500897.1
gene.CpA0500915.1
gene.CpA0501032.1
gene.CpA0501501.1
gene.CpA0501649.1
gene.CpA0502819.1
gene.CpA0503874.1
gene.CpA0504449.1
gene.CpA0600041.1
gene.CpA0600175.1
gene.CpA0601309.1
gene.CpA0602302.1
gene.CpA0602382.1
gene.CpA0603493.1
gene.CpA0700524.1
gene.CpA0701107.1
gene.CpA0702780.1
gene.CpA0703397.1
gene.CpB0100283.1
gene.CpB0101808.1
gene.CpB0102210.1
gene.CpB0102513.1
gene.CpB0102967.1
gene.CpB0103289.1
gene.CpB0103297.1
gene.CpB0103401.1
gene.CpB0105018.1
gene.CpB0105393.1
gene.CpB0201563.1
gene.CpB0201692.1
gene.CpB0201920.1
gene.CpB0202574.1
gene.CpB0203445.1
gene.CpB0204529.1
gene.CpB0204987.1
gene.CpB0205149.1
gene.CpB0205231.1
gene.CpB0205684.1
gene.CpB0300982.1
gene.CpB0301529.1
gene.CpB0302454.1
gene.CpB0302703.1
gene.CpB0303277.1
gene.CpB0400053.1
gene.CpB0400972.1
gene.CpB0401464.1
gene.CpB0403073.1
gene.CpB0403397.1
gene.CpB0403701.1
gene.CpB0403964.1
gene.CpB0500186.1
gene.CpB0500809.1
gene.CpB0501146.1
gene.CpB0501161.1
gene.CpB0501878.1
gene.CpB0502337.1
gene.CpB0502412.1
gene.CpB0502508.1
gene.CpB0503357.1
gene.CpB0503623.1
gene.CpB0602226.1
gene.CpB0700483.1
gene.CpB0700954.1
gene.CpB0701319.1

## Sheet: salmon
gene id
gene.Cp0000455.1
gene.Cp0001025.1
gene.Cp0001473.1
gene.CpA0100739.1
gene.CpA0102576.1
gene.CpA0104286.1
gene.CpA0104389.1
gene.CpA0104419.1
gene.CpA0104510.1
gene.CpA0104511.1
gene.CpA0105329.1
gene.CpA0105642.1
gene.CpA0200018.1
gene.CpA0200066.1
gene.CpA0200098.1
gene.CpA0201939.1
gene.CpA0201944.1
gene.CpA0202111.1
gene.CpA0202312.1
gene.CpA0202565.1
gene.CpA0202623.1
gene.CpA0202808.1
gene.CpA0203545.1
gene.CpA0301387.1
gene.CpA0301664.1
gene.CpA0302161.1
gene.CpA0302814.1
gene.CpA0303169.1
gene.CpA0303409.1
gene.CpA0402382.1
gene.CpA0402884.1
gene.CpA0403239.1
gene.CpA0403622.1
gene.CpA0403632.1
gene.CpA0405104.1
gene.CpA0405118.1
gene.CpA0405164.1
gene.CpA0500695.1
gene.CpA0500777.1
gene.CpA0501644.1
gene.CpA0502394.1
gene.CpA0504026.1
gene.CpA0504081.1
gene.CpA0600040.1
gene.CpA0600127.1
gene.CpA0600260.1
gene.CpA0600913.1
gene.CpA0601078.1
gene.CpA0601774.1
gene.CpA0602052.1
gene.CpA0602416.1
gene.CpA0602877.1
gene.CpA0602878.1
gene.CpA0602973.1
gene.CpA0603099.1
gene.CpA0603379.1
gene.CpA0701014.1
gene.CpA0701626.1
gene.CpA0702905.1
gene.CpA0702908.1
gene.CpA0703361.1
gene.CpA0704042.1
gene.CpB0102522.1
gene.CpB0102523.1
gene.CpB0102879.1
gene.CpB0104138.1
gene.CpB0105770.1
gene.CpB0201645.1
gene.CpB0201676.1
gene.CpB0202364.1
gene.CpB0202654.1
gene.CpB0205425.1
gene.CpB0300293.1
gene.CpB0301112.1
gene.CpB0301326.1
gene.CpB0301789.1
gene.CpB0401057.1
gene.CpB0401182.1
gene.CpB0401583.1
gene.CpB0402012.1
gene.CpB0402133.1
gene.CpB0402885.1
gene.CpB0403124.1
gene.CpB0403455.1
gene.CpB0500717.1
gene.CpB0600140.1
gene.CpB0600438.1
gene.CpB0600840.1
gene.CpB0601038.1
gene.CpB0601136.1
gene.CpB0602243.1
gene.CpB0603112.1
gene.CpB0603279.1

## Sheet: yellow
gene id
gene.Cp0000078.1
gene.Cp0000250.1
gene.Cp0000260.1
gene.Cp0000307.1
gene.Cp0000315.1
gene.Cp0000543.1
gene.Cp0000598.1
gene.Cp0000609.1
gene.Cp0000657.1
gene.Cp0001047.1
gene.Cp0001057.1
gene.Cp0001226.1
gene.Cp0001320.1
gene.Cp0001386.1
gene.Cp0001413.1
gene.Cp0001448.1
gene.Cp0001456.1
gene.Cp0001601.1
gene.Cp0001628.1
gene.Cp0001633.1
gene.Cp0001687.1
gene.CpA0100468.1
gene.CpA0100472.1
gene.CpA0101017.1
gene.CpA0101525.1
gene.CpA0101723.1
gene.CpA0101742.1
gene.CpA0101780.1
gene.CpA0101905.1
gene.CpA0102007.1
gene.CpA0102061.1
gene.CpA0102210.1
gene.CpA0102287.1
gene.CpA0102396.1
gene.CpA0102415.1
gene.CpA0102457.1
gene.CpA0102506.1
gene.CpA0102532.1
gene.CpA0102694.1
gene.CpA0102905.1
gene.CpA0102912.1
gene.CpA0102993.1
gene.CpA0103013.1
gene.CpA0103019.1
gene.CpA0103021.1
gene.CpA0103046.1
gene.CpA0103118.1
gene.CpA0103130.1
gene.CpA0103205.1
gene.CpA0103248.1
gene.CpA0103392.1
gene.CpA0103761.1
gene.CpA0103944.1
gene.CpA0103994.1
gene.CpA0104111.1
gene.CpA0104116.1
gene.CpA0104219.1
gene.CpA0104451.1
gene.CpA0104474.1
gene.CpA0104786.1
gene.CpA0104896.1
gene.CpA0104969.1
gene.CpA0105045.1
gene.CpA0105158.1
gene.CpA0105198.1
gene.CpA0105279.1
gene.CpA0105599.1
gene.CpA0105661.1
gene.CpA0200077.1
gene.CpA0200110.1
gene.CpA0200226.1
gene.CpA0200258.1
gene.CpA0200264.1
gene.CpA0200460.1
gene.CpA0200479.1
gene.CpA0200563.1
gene.CpA0200565.1
gene.CpA0200582.1
gene.CpA0200659.1
gene.CpA0200672.1
gene.CpA0200723.1
gene.CpA0200945.1
gene.CpA0200949.1
gene.CpA0200979.1
gene.CpA0200997.1
gene.CpA0201049.1
gene.CpA0201050.1
gene.CpA0201162.1
gene.CpA0201198.1
gene.CpA0201230.1
gene.CpA0201350.1
gene.CpA0201388.1
gene.CpA0201400.1
gene.CpA0201420.1
gene.CpA0201497.1
gene.CpA0201498.1
gene.CpA0201586.1
gene.CpA0201642.1
gene.CpA0201645.1
gene.CpA0201692.1
gene.CpA0201728.1
gene.CpA0201729.1
gene.CpA0201732.1
gene.CpA0201903.1
gene.CpA0201982.1
gene.CpA0202065.1
gene.CpA0202105.1
gene.CpA0202148.1
gene.CpA0202150.1
gene.CpA0202158.1
gene.CpA0202172.1
gene.CpA0202340.1
gene.CpA0202448.1
gene.CpA0202699.1
gene.CpA0202780.1
gene.CpA0202801.1
gene.CpA0202883.1
gene.CpA0202957.1
gene.CpA0202958.1
gene.CpA0203027.1
gene.CpA0203063.1
gene.CpA0203200.1
gene.CpA0203230.1
gene.CpA0203262.1
gene.CpA0203265.1
gene.CpA0203326.1
gene.CpA0203398.1
gene.CpA0203456.1
gene.CpA0203465.1
gene.CpA0203476.1
gene.CpA0203489.1
gene.CpA0203660.1
gene.CpA0203906.1
gene.CpA0204051.1
gene.CpA0204194.1
gene.CpA0204299.1
gene.CpA0204453.1
gene.CpA0204460.1
gene.CpA0204482.1
gene.CpA0204669.1
gene.CpA0204768.1
gene.CpA0300002.1
gene.CpA0300014.1
gene.CpA0300020.1
gene.CpA0300121.1
gene.CpA0300131.1
gene.CpA0300185.1
gene.CpA0300210.1
gene.CpA0300247.1
gene.CpA0300588.1
gene.CpA0300619.1
gene.CpA0300640.1
gene.CpA0300755.1
gene.CpA0300925.1
gene.CpA0300964.1
gene.CpA0301196.1
gene.CpA0301234.1
gene.CpA0301369.1
gene.CpA0301382.1
gene.CpA0301385.1
gene.CpA0301577.1
gene.CpA0301600.1
gene.CpA0301606.1
gene.CpA0301809.1
gene.CpA0301822.1
gene.CpA0301942.1
gene.CpA0301961.1
gene.CpA0301986.1
gene.CpA0302177.1
gene.CpA0302184.1
gene.CpA0302190.1
gene.CpA0302242.1
gene.CpA0302262.1
gene.CpA0302366.1
gene.CpA0302545.1
gene.CpA0302673.1
gene.CpA0302696.1
gene.CpA0303127.1
gene.CpA0303241.1
gene.CpA0303250.1
gene.CpA0303460.1
gene.CpA0303474.1
gene.CpA0303490.1
gene.CpA0303497.1
gene.CpA0303539.1
gene.CpA0303621.1
gene.CpA0303824.1
gene.CpA0304058.1
gene.CpA0304237.1
gene.CpA0400017.1
gene.CpA0400071.1
gene.CpA0400276.1
gene.CpA0400312.1
gene.CpA0400341.1
gene.CpA0400453.1
gene.CpA0400706.1
gene.CpA0400804.1
gene.CpA0400807.1
gene.CpA0400982.1
gene.CpA0401121.1
gene.CpA0401171.1
gene.CpA0401207.1
gene.CpA0401208.1
gene.CpA0401209.1
gene.CpA0401246.1
gene.CpA0401372.1
gene.CpA0401411.1
gene.CpA0401508.1
gene.CpA0401608.1
gene.CpA0401633.1
gene.CpA0401718.1
gene.CpA0401894.1
gene.CpA0402134.1
gene.CpA0402194.1
gene.CpA0402265.1
gene.CpA0402427.1
gene.CpA0402567.1
gene.CpA0402569.1
gene.CpA0402605.1
gene.CpA0402662.1
gene.CpA0402699.1
gene.CpA0402733.1
gene.CpA0402807.1
gene.CpA0402859.1
gene.CpA0402871.1
gene.CpA0402890.1
gene.CpA0402936.1
gene.CpA0402971.1
gene.CpA0403047.1
gene.CpA0403181.1
gene.CpA0403274.1
gene.CpA0403288.1
gene.CpA0403345.1
gene.CpA0403363.1
gene.CpA0403429.1
gene.CpA0403484.1
gene.CpA0403636.1
gene.CpA0403650.1
gene.CpA0403671.1
gene.CpA0403703.1
gene.CpA0403706.1
gene.CpA0403713.1
gene.CpA0403749.1
gene.CpA0403819.1
gene.CpA0403823.1
gene.CpA0403996.1
gene.CpA0404042.1
gene.CpA0404152.1
gene.CpA0404153.1
gene.CpA0404157.1
gene.CpA0404223.1
gene.CpA0404264.1
gene.CpA0404339.1
gene.CpA0404344.1
gene.CpA0404360.1
gene.CpA0404403.1
gene.CpA0404501.1
gene.CpA0404744.1
gene.CpA0404969.1
gene.CpA0404996.1
gene.CpA0405099.1
gene.CpA0405203.1
gene.CpA0405408.1
gene.CpA0405420.1
gene.CpA0405448.1
gene.CpA0405490.1
gene.CpA0405526.1
gene.CpA0405582.1
gene.CpA0405583.1
gene.CpA0405605.1
gene.CpA0405654.1
gene.CpA0405671.1
gene.CpA0500033.1
gene.CpA0500037.1
gene.CpA0500063.1
gene.CpA0500145.1
gene.CpA0500213.1
gene.CpA0500215.1
gene.CpA0500265.1
gene.CpA0500325.1
gene.CpA0500372.1
gene.CpA0500638.1
gene.CpA0500653.1
gene.CpA0500682.1
gene.CpA0500907.1
gene.CpA0500930.1
gene.CpA0501073.1
gene.CpA0501126.1
gene.CpA0501333.1
gene.CpA0501345.1
gene.CpA0501461.1
gene.CpA0501633.1
gene.CpA0501745.1
gene.CpA0501751.1
gene.CpA0501826.1
gene.CpA0501844.1
gene.CpA0501864.1
gene.CpA0501956.1
gene.CpA0502061.1
gene.CpA0502180.1
gene.CpA0502224.1
gene.CpA0502364.1
gene.CpA0502378.1
gene.CpA0502382.1
gene.CpA0502855.1
gene.CpA0502961.1
gene.CpA0503212.1
gene.CpA0503251.1
gene.CpA0503286.1
gene.CpA0503341.1
gene.CpA0503342.1
gene.CpA0503728.1
gene.CpA0503775.1
gene.CpA0503780.1
gene.CpA0503794.1
gene.CpA0503886.1
gene.CpA0503888.1
gene.CpA0503905.1
gene.CpA0503930.1
gene.CpA0503970.1
gene.CpA0503999.1
gene.CpA0504038.1
gene.CpA0504148.1
gene.CpA0504444.1
gene.CpA0504464.1
gene.CpA0504525.1
gene.CpA0504526.1
gene.CpA0504534.1
gene.CpA0504793.1
gene.CpA0504943.1
gene.CpA0504979.1
gene.CpA0505027.1
gene.CpA0505037.1
gene.CpA0505064.1
gene.CpA0505206.1
gene.CpA0505225.1
gene.CpA0505246.1
gene.CpA0505255.1
gene.CpA0600017.1
gene.CpA0600025.1
gene.CpA0600039.1
gene.CpA0600267.1
gene.CpA0600365.1
gene.CpA0600369.1
gene.CpA0600381.1
gene.CpA0600427.1
gene.CpA0600591.1
gene.CpA0600621.1
gene.CpA0600864.1
gene.CpA0600865.1
gene.CpA0600915.1
gene.CpA0600922.1
gene.CpA0601079.1
gene.CpA0601153.1
gene.CpA0601198.1
gene.CpA0601236.1
gene.CpA0601403.1
gene.CpA0601410.1
gene.CpA0601417.1
gene.CpA0601466.1
gene.CpA0601729.1
gene.CpA0601807.1
gene.CpA0601852.1
gene.CpA0601883.1
gene.CpA0602010.1
gene.CpA0602043.1
gene.CpA0602075.1
gene.CpA0602076.1
gene.CpA0602169.1
gene.CpA0602219.1
gene.CpA0602222.1
gene.CpA0602264.1
gene.CpA0602357.1
gene.CpA0602384.1
gene.CpA0602401.1
gene.CpA0602504.1
gene.CpA0602676.1
gene.CpA0602688.1
gene.CpA0602707.1
gene.CpA0602937.1
gene.CpA0603120.1
gene.CpA0603172.1
gene.CpA0603246.1
gene.CpA0603346.1
gene.CpA0603347.1
gene.CpA0603387.1
gene.CpA0603432.1
gene.CpA0603464.1
gene.CpA0603642.1
gene.CpA0603883.1
gene.CpA0603929.1
gene.CpA0603958.1
gene.CpA0700057.1
gene.CpA0700071.1
gene.CpA0700077.1
gene.CpA0700080.1
gene.CpA0700386.1
gene.CpA0700479.1
gene.CpA0700481.1
gene.CpA0700504.1
gene.CpA0700506.1
gene.CpA0700560.1
gene.CpA0700608.1
gene.CpA0700685.1
gene.CpA0700737.1
gene.CpA0700966.1
gene.CpA0700968.1
gene.CpA0700993.1
gene.CpA0701000.1
gene.CpA0701024.1
gene.CpA0701029.1
gene.CpA0701271.1
gene.CpA0701291.1
gene.CpA0701292.1
gene.CpA0701319.1
gene.CpA0701329.1
gene.CpA0701380.1
gene.CpA0701523.1
gene.CpA0701548.1
gene.CpA0701549.1
gene.CpA0701551.1
gene.CpA0701608.1
gene.CpA0701629.1
gene.CpA0701663.1
gene.CpA0701710.1
gene.CpA0701717.1
gene.CpA0701770.1
gene.CpA0701780.1
gene.CpA0701794.1
gene.CpA0701798.1
gene.CpA0701811.1
gene.CpA0701930.1
gene.CpA0701942.1
gene.CpA0702014.1
gene.CpA0702162.1
gene.CpA0702216.1
gene.CpA0702245.1
gene.CpA0702337.1
gene.CpA0702338.1
gene.CpA0702450.1
gene.CpA0702475.1
gene.CpA0702479.1
gene.CpA0702486.1
gene.CpA0702489.1
gene.CpA0702557.1
gene.CpA0702581.1
gene.CpA0702669.1
gene.CpA0702775.1
gene.CpA0702783.1
gene.CpA0702809.1
gene.CpA0702879.1
gene.CpA0702889.1
gene.CpA0702956.1
gene.CpA0703133.1
gene.CpA0703257.1
gene.CpA0703266.1
gene.CpA0703300.1
gene.CpA0703301.1
gene.CpA0703502.1
gene.CpA0703549.1
gene.CpA0703665.1
gene.CpA0703792.1
gene.CpA0703901.1
gene.CpA0704061.1
gene.CpA0704093.1
gene.CpA0704141.1
gene.CpA0704155.1
gene.CpA0704280.1
gene.CpA0704296.1
gene.CpA0704470.1
gene.CpB0100045.1
gene.CpB0100323.1
gene.CpB0100330.1
gene.CpB0100404.1
gene.CpB0100419.1
gene.CpB0100463.1
gene.CpB0100467.1
gene.CpB0100529.1
gene.CpB0100573.1
gene.CpB0100607.1
gene.CpB0100640.1
gene.CpB0100708.1
gene.CpB0100756.1
gene.CpB0100801.1
gene.CpB0100825.1
gene.CpB0101053.1
gene.CpB0101138.1
gene.CpB0101339.1
gene.CpB0101386.1
gene.CpB0101446.1
gene.CpB0101468.1
gene.CpB0101610.1
gene.CpB0101624.1
gene.CpB0101638.1
gene.CpB0101686.1
gene.CpB0101735.1
gene.CpB0101751.1
gene.CpB0101766.1
gene.CpB0101838.1
gene.CpB0101950.1
gene.CpB0102029.1
gene.CpB0102295.1
gene.CpB0102367.1
gene.CpB0102390.1
gene.CpB0102405.1
gene.CpB0102521.1
gene.CpB0102623.1
gene.CpB0102655.1
gene.CpB0102735.1
gene.CpB0102954.1
gene.CpB0102966.1
gene.CpB0103042.1
gene.CpB0103183.1
gene.CpB0103184.1
gene.CpB0103253.1
gene.CpB0103466.1
gene.CpB0103479.1
gene.CpB0103497.1
gene.CpB0103547.1
gene.CpB0103549.1
gene.CpB0103579.1
gene.CpB0103581.1
gene.CpB0103603.1
gene.CpB0103670.1
gene.CpB0103675.1
gene.CpB0103736.1
gene.CpB0103776.1
gene.CpB0103800.1
gene.CpB0103811.1
gene.CpB0104387.1
gene.CpB0104475.1
gene.CpB0104487.1
gene.CpB0104489.1
gene.CpB0104527.1
gene.CpB0104548.1
gene.CpB0104653.1
gene.CpB0104680.1
gene.CpB0104685.1
gene.CpB0104694.1
gene.CpB0104695.1
gene.CpB0104754.1
gene.CpB0104969.1
gene.CpB0105020.1
gene.CpB0105113.1
gene.CpB0105136.1
gene.CpB0105186.1
gene.CpB0105209.1
gene.CpB0105249.1
gene.CpB0105479.1
gene.CpB0105507.1
gene.CpB0105544.1
gene.CpB0105593.1
gene.CpB0105634.1
gene.CpB0105640.1
gene.CpB0105981.1
gene.CpB0106036.1
gene.CpB0106116.1
gene.CpB0200148.1
gene.CpB0200163.1
gene.CpB0200228.1
gene.CpB0200256.1
gene.CpB0200292.1
gene.CpB0200379.1
gene.CpB0200410.1
gene.CpB0200522.1
gene.CpB0200569.1
gene.CpB0200595.1
gene.CpB0200635.1
gene.CpB0200822.1
gene.CpB0200843.1
gene.CpB0200850.1
gene.CpB0201011.1
gene.CpB0201181.1
gene.CpB0201184.1
gene.CpB0201311.1
gene.CpB0201366.1
gene.CpB0201374.1
gene.CpB0201466.1
gene.CpB0201709.1
gene.CpB0201769.1
gene.CpB0201884.1
gene.CpB0201956.1
gene.CpB0201990.1
gene.CpB0202060.1
gene.CpB0202175.1
gene.CpB0202184.1
gene.CpB0202260.1
gene.CpB0202315.1
gene.CpB0202423.1
gene.CpB0202499.1
gene.CpB0202703.1
gene.CpB0202786.1
gene.CpB0202792.1
gene.CpB0203027.1
gene.CpB0203074.1
gene.CpB0203109.1
gene.CpB0203217.1
gene.CpB0203259.1
gene.CpB0203363.1
gene.CpB0203443.1
gene.CpB0203447.1
gene.CpB0203580.1
gene.CpB0203581.1
gene.CpB0203714.1
gene.CpB0203721.1
gene.CpB0203767.1
gene.CpB0203781.1
gene.CpB0203811.1
gene.CpB0203922.1
gene.CpB0203979.1
gene.CpB0204011.1
gene.CpB0204016.1
gene.CpB0204120.1
gene.CpB0204170.1
gene.CpB0204179.1
gene.CpB0204227.1
gene.CpB0204236.1
gene.CpB0204292.1
gene.CpB0204315.1
gene.CpB0204342.1
gene.CpB0204358.1
gene.CpB0204397.1
gene.CpB0204398.1
gene.CpB0204407.1
gene.CpB0204408.1
gene.CpB0204438.1
gene.CpB0204451.1
gene.CpB0204668.1
gene.CpB0204691.1
gene.CpB0204703.1
gene.CpB0204806.1
gene.CpB0204925.1
gene.CpB0204928.1
gene.CpB0204942.1
gene.CpB0204950.1
gene.CpB0204951.1
gene.CpB0205145.1
gene.CpB0205167.1
gene.CpB0205168.1
gene.CpB0205218.1
gene.CpB0205324.1
gene.CpB0205400.1
gene.CpB0205429.1
gene.CpB0205468.1
gene.CpB0205470.1
gene.CpB0205639.1
gene.CpB0205706.1
gene.CpB0205739.1
gene.CpB0205768.1
gene.CpB0205797.1
gene.CpB0205846.1
gene.CpB0205874.1
gene.CpB0205880.1
gene.CpB0205892.1
gene.CpB0300106.1
gene.CpB0300291.1
gene.CpB0300364.1
gene.CpB0300376.1
gene.CpB0300446.1
gene.CpB0300518.1
gene.CpB0300559.1
gene.CpB0300621.1
gene.CpB0300682.1
gene.CpB0300717.1
gene.CpB0300762.1
gene.CpB0300778.1
gene.CpB0300802.1
gene.CpB0300828.1
gene.CpB0300876.1
gene.CpB0300912.1
gene.CpB0301114.1
gene.CpB0301141.1
gene.CpB0301345.1
gene.CpB0301504.1
gene.CpB0301560.1
gene.CpB0301568.1
gene.CpB0301675.1
gene.CpB0301717.1
gene.CpB0301925.1
gene.CpB0301950.1
gene.CpB0302007.1
gene.CpB0302009.1
gene.CpB0302017.1
gene.CpB0302183.1
gene.CpB0302187.1
gene.CpB0302209.1
gene.CpB0302220.1
gene.CpB0302260.1
gene.CpB0302335.1
gene.CpB0302371.1
gene.CpB0302549.1
gene.CpB0302666.1
gene.CpB0302668.1
gene.CpB0302949.1
gene.CpB0302974.1
gene.CpB0303050.1
gene.CpB0303079.1
gene.CpB0303098.1
gene.CpB0303115.1
gene.CpB0303180.1
gene.CpB0303184.1
gene.CpB0303213.1
gene.CpB0303267.1
gene.CpB0303347.1
gene.CpB0303372.1
gene.CpB0303446.1
gene.CpB0303470.1
gene.CpB0303480.1
gene.CpB0303501.1
gene.CpB0303568.1
gene.CpB0400125.1
gene.CpB0400171.1
gene.CpB0400232.1
gene.CpB0400291.1
gene.CpB0400320.1
gene.CpB0400321.1
gene.CpB0400523.1
gene.CpB0400623.1
gene.CpB0400648.1
gene.CpB0400730.1
gene.CpB0400740.1
gene.CpB0400766.1
gene.CpB0400865.1
gene.CpB0400878.1
gene.CpB0400884.1
gene.CpB0400935.1
gene.CpB0401208.1
gene.CpB0401224.1
gene.CpB0401382.1
gene.CpB0401383.1
gene.CpB0401447.1
gene.CpB0401462.1
gene.CpB0401482.1
gene.CpB0401646.1
gene.CpB0401823.1
gene.CpB0401969.1
gene.CpB0401970.1
gene.CpB0402005.1
gene.CpB0402094.1
gene.CpB0402237.1
gene.CpB0402244.1
gene.CpB0402256.1
gene.CpB0402309.1
gene.CpB0402322.1
gene.CpB0402347.1
gene.CpB0402440.1
gene.CpB0402459.1
gene.CpB0402588.1
gene.CpB0402660.1
gene.CpB0402734.1
gene.CpB0402794.1
gene.CpB0402842.1
gene.CpB0402909.1
gene.CpB0402958.1
gene.CpB0402959.1
gene.CpB0402974.1
gene.CpB0403019.1
gene.CpB0403057.1
gene.CpB0403181.1
gene.CpB0403193.1
gene.CpB0403317.1
gene.CpB0403329.1
gene.CpB0403395.1
gene.CpB0403581.1
gene.CpB0403635.1
gene.CpB0403673.1
gene.CpB0403711.1
gene.CpB0403786.1
gene.CpB0403792.1
gene.CpB0403810.1
gene.CpB0403828.1
gene.CpB0403967.1
gene.CpB0500043.1
gene.CpB0500050.1
gene.CpB0500091.1
gene.CpB0500160.1
gene.CpB0500189.1
gene.CpB0500197.1
gene.CpB0500239.1
gene.CpB0500283.1
gene.CpB0500506.1
gene.CpB0500613.1
gene.CpB0500766.1
gene.CpB0500781.1
gene.CpB0500793.1
gene.CpB0500835.1
gene.CpB0501047.1
gene.CpB0501054.1
gene.CpB0501055.1
gene.CpB0501057.1
gene.CpB0501063.1
gene.CpB0501108.1
gene.CpB0501162.1
gene.CpB0501264.1
gene.CpB0501310.1
gene.CpB0501368.1
gene.CpB0501416.1
gene.CpB0501548.1
gene.CpB0501579.1
gene.CpB0501585.1
gene.CpB0501630.1
gene.CpB0501687.1
gene.CpB0501697.1
gene.CpB0501732.1
gene.CpB0501738.1
gene.CpB0501762.1
gene.CpB0501977.1
gene.CpB0502047.1
gene.CpB0502114.1
gene.CpB0502166.1
gene.CpB0502209.1
gene.CpB0502308.1
gene.CpB0502339.1
gene.CpB0502448.1
gene.CpB0502551.1
gene.CpB0502584.1
gene.CpB0502585.1
gene.CpB0502678.1
gene.CpB0502780.1
gene.CpB0502893.1
gene.CpB0503042.1
gene.CpB0503055.1
gene.CpB0503081.1
gene.CpB0503108.1
gene.CpB0503145.1
gene.CpB0503157.1
gene.CpB0503178.1
gene.CpB0503215.1
gene.CpB0503309.1
gene.CpB0503361.1
gene.CpB0503581.1
gene.CpB0503680.1
gene.CpB0503687.1
gene.CpB0600057.1
gene.CpB0600082.1
gene.CpB0600123.1
gene.CpB0600129.1
gene.CpB0600138.1
gene.CpB0600277.1
gene.CpB0600292.1
gene.CpB0600383.1
gene.CpB0600443.1
gene.CpB0600505.1
gene.CpB0600667.1
gene.CpB0600721.1
gene.CpB0600879.1
gene.CpB0600947.1
gene.CpB0601026.1
gene.CpB0601105.1
gene.CpB0601552.1
gene.CpB0601877.1
gene.CpB0601937.1
gene.CpB0602070.1
gene.CpB0602161.1
gene.CpB0602348.1
gene.CpB0602353.1
gene.CpB0602434.1
gene.CpB0602504.1
gene.CpB0602680.1
gene.CpB0602752.1
gene.CpB0602753.1
gene.CpB0602759.1
gene.CpB0602770.1
gene.CpB0603045.1
gene.CpB0603048.1
gene.CpB0603109.1
gene.CpB0603275.1
gene.CpB0603342.1
gene.CpB0603474.1
gene.CpB0603500.1
gene.CpB0700102.1
gene.CpB0700294.1
gene.CpB0700392.1
gene.CpB0700418.1
gene.CpB0700529.1
gene.CpB0700588.1
gene.CpB0700956.1
gene.CpB0701014.1
gene.CpB0701027.1
gene.CpB0701139.1
gene.CpB0701151.1
gene.CpB0701172.1
gene.CpB0701358.1
gene.CpB0701407.1
gene.CpB0701451.1
gene.CpB0701513.1
gene.CpB0701538.1
gene.CpB0701597.1
gene.CpB0701622.1
gene.CpB0701693.1
gene.CpB0701724.1
gene.CpB0701805.1
gene.CpB0701830.1
gene.CpB0702034.1
gene.CpB0702102.1
gene.CpB0702146.1
gene.CpB0702167.1
gene.CpB0702256.1
gene.CpB0702264.1
gene.CpB0702284.1
gene.CpB0702380.1
gene.CpB0702396.1

## Sheet: greenyellow
gene id
gene.CpA0100498.1
gene.CpA0100926.1
gene.CpA0102214.1
gene.CpA0103898.1
gene.CpA0104053.1
gene.CpA0104121.1
gene.CpA0104313.1
gene.CpA0104368.1
gene.CpA0104386.1
gene.CpA0104395.1
gene.CpA0104714.1
gene.CpA0104721.1
gene.CpA0105148.1
gene.CpA0105240.1
gene.CpA0105402.1
gene.CpA0105436.1
gene.CpA0200212.1
gene.CpA0201688.1
gene.CpA0202626.1
gene.CpA0204421.1
gene.CpA0204471.1
gene.CpA0300045.1
gene.CpA0303189.1
gene.CpA0303976.1
gene.CpA0400250.1
gene.CpA0401382.1
gene.CpA0401973.1
gene.CpA0403853.1
gene.CpA0404801.1
gene.CpA0405123.1
gene.CpA0405311.1
gene.CpA0500356.1
gene.CpA0500579.1
gene.CpA0500609.1
gene.CpA0500778.1
gene.CpA0501661.1
gene.CpA0501713.1
gene.CpA0502417.1
gene.CpA0504106.1
gene.CpA0504385.1
gene.CpA0600924.1
gene.CpA0601031.1
gene.CpA0602869.1
gene.CpA0603152.1
gene.CpA0603672.1
gene.CpA0603934.1
gene.CpA0700950.1
gene.CpA0700992.1
gene.CpA0701652.1
gene.CpA0702870.1
gene.CpA0703142.1
gene.CpA0703866.1
gene.CpA0704053.1
gene.CpB0100058.1
gene.CpB0100377.1
gene.CpB0100382.1
gene.CpB0100922.1
gene.CpB0101857.1
gene.CpB0102025.1
gene.CpB0103374.1
gene.CpB0103709.1
gene.CpB0104618.1
gene.CpB0105196.1
gene.CpB0105488.1
gene.CpB0106029.1
gene.CpB0200221.1
gene.CpB0200412.1
gene.CpB0200617.1
gene.CpB0201644.1
gene.CpB0202130.1
gene.CpB0202797.1
gene.CpB0202897.1
gene.CpB0203842.1
gene.CpB0204318.1
gene.CpB0204362.1
gene.CpB0205375.1
gene.CpB0205553.1
gene.CpB0300495.1
gene.CpB0300719.1
gene.CpB0301334.1
gene.CpB0301672.1
gene.CpB0302856.1
gene.CpB0400193.1
gene.CpB0400578.1
gene.CpB0401235.1
gene.CpB0401612.1
gene.CpB0401957.1
gene.CpB0402278.1
gene.CpB0402302.1
gene.CpB0402745.1
gene.CpB0403546.1
gene.CpB0500175.1
gene.CpB0500657.1
gene.CpB0501777.1
gene.CpB0501856.1
gene.CpB0501993.1
gene.CpB0503248.1
gene.CpB0600112.1
gene.CpB0600529.1
gene.CpB0600569.1
gene.CpB0600613.1
gene.CpB0601632.1
gene.CpB0601902.1
gene.CpB0603343.1
gene.CpB0700512.1
gene.CpB0700828.1
gene.CpB0700930.1
gene.CpB0701040.1
gene.CpB0701127.1
gene.CpB0701921.1
