# Supplementary material for: Combined analyses of transcriptome and metabolome reveal the mechanism of exogenous strigolactone regulating the response of elephant grass to drought stress
Source: Front Plant Sci. 2023 May 8;14:1186718. doi: 10.3389/fpls.2023.1186718 (PMC10200884; doi:10.3389/fpls.2023.1186718)
Supplement: Supplementary File 4 — The degree of top 30 hub genes with a higher weight in eight modules. [file DataSheet_4.xlsx]

## Sheet: blue
gene id	gene name	degree	module
gene.CpA0700513.1		520.804	blue
gene.CpB0202678.1		518.621	blue
gene.CpA0504761.1		518.556	blue
gene.CpA0503348.1		517.411	blue
gene.CpA0700959.1		517.039	blue
gene.CpB0204954.1		514.587	blue
gene.CpB0205060.1		514.497	blue
gene.CpB0205287.1		513.939	blue
gene.CpA0600181.1		512.432	blue
gene.CpA0105255.1		512.429	blue
gene.CpA0700660.1		511.527	blue
gene.CpB0500909.1		509.803	blue
gene.CpB0700538.1		508.551	blue
gene.CpA0504993.1		508.271	blue
gene.CpA0601914.1		507.43	blue
gene.CpA0102392.1		506.842	blue
gene.CpB0205081.1		505.584	blue
gene.CpA0600383.1		505.374	blue
gene.CpB0500515.1		505.037	blue
gene.CpA0105385.1		504.846	blue
gene.CpB0105721.1		503.416	blue
gene.CpB0202658.1		503.147	blue
gene.CpB0205440.1		503.01	blue
gene.CpA0101446.1		502.867	blue
gene.CpA0100430.1		502.376	blue
gene.CpA0200418.1		502.307	blue
gene.CpB0104060.1		501.927	blue
gene.CpB0501978.1		500.434	blue
gene.CpB0502221.1		500.401	blue
gene.CpA0301051.1		500.024	blue

## Sheet: brown
gene id	gene name	degree	module
gene.CpB0501645.1		447.541	brown
gene.CpA0702963.1		445.62	brown
gene.CpB0103949.1		441.373	brown
gene.CpA0701715.1		439.744	brown
gene.CpB0203073.1		437.323	brown
gene.CpA0303255.1		437.188	brown
gene.CpA0301066.1		437.082	brown
gene.CpB0200948.1		436.728	brown
gene.CpA0402467.1		436.228	brown
gene.CpA0501850.1		434.826	brown
gene.CpB0302678.1		433.831	brown
gene.CpA0600308.1		433.595	brown
gene.CpB0501643.1		433.133	brown
gene.CpA0503188.1		433.068	brown
gene.CpB0205632.1		431.528	brown
gene.CpA0504842.1		431.485	brown
gene.CpA0203312.1		429.066	brown
gene.CpB0205103.1		428.999	brown
gene.CpB0403386.1		428.486	brown
gene.CpB0500467.1		427.411	brown
gene.CpB0201301.1		427.12	brown
gene.CpA0403655.1		426.576	brown
gene.CpB0103652.1		426.15	brown
gene.CpA0600615.1		426.131	brown
gene.CpA0405866.1		425.776	brown
gene.CpA0602901.1		425.61	brown
gene.CpA0100504.1		425.603	brown
gene.CpB0601401.1		425.324	brown
gene.CpB0204002.1		425.292	brown
gene.CpA0103396.1		425.107	brown

## Sheet: turquoise
gene id	gene name	degree	module
gene.CpB0701334.1		1026.8	turquoise
gene.CpA0203396.1		1020.16	turquoise
gene.CpA0200714.1		1018.22	turquoise
gene.CpA0500371.1		1017.8	turquoise
gene.CpA0404657.1		1017.57	turquoise
gene.CpA0103469.1		1015.98	turquoise
gene.CpA0501181.1		1000.52	turquoise
gene.CpB0501130.1		998.282	turquoise
gene.CpA0200899.1		996.394	turquoise
gene.CpA0104885.1		993.739	turquoise
gene.CpB0104160.1		993.438	turquoise
gene.CpA0601002.1		992.409	turquoise
gene.CpB0204000.1		991.316	turquoise
gene.CpB0401109.1		990.581	turquoise
gene.CpA0301239.1		985.514	turquoise
gene.CpB0302980.1		985.29	turquoise
gene.CpA0700804.1		984.902	turquoise
gene.CpA0102148.1		984.394	turquoise
gene.CpA0104281.1		982.107	turquoise
gene.CpB0501328.1		981.936	turquoise
gene.CpA0300754.1		981.631	turquoise
gene.CpB0602919.1		981.564	turquoise
gene.CpB0601120.1		981.24	turquoise
gene.CpA0302196.1		980.443	turquoise
gene.CpA0504528.1		980.375	turquoise
gene.CpB0602313.1		979.703	turquoise
gene.CpB0602863.1		979.456	turquoise
gene.CpA0700873.1		979.414	turquoise
gene.CpB0602761.1		978.411	turquoise
gene.CpA0600807.1		975.826	turquoise

## Sheet: magenta
gene id	gene name	degree	module
gene.CpA0601997.1		109.587	magenta
gene.CpA0104960.1		105.256	magenta
gene.Cp0000564.1		102.933	magenta
gene.CpA0505187.1		102.771	magenta
gene.CpB0502011.1		101.547	magenta
gene.CpA0203446.1		101.088	magenta
gene.CpA0701819.1		100.176	magenta
gene.CpB0400640.1		100.015	magenta
gene.CpB0501748.1		99.378	magenta
gene.CpB0301307.1		99.0282	magenta
gene.CpB0201206.1		98.7817	magenta
gene.CpB0200190.1		98.4664	magenta
gene.CpA0100763.1		98.3654	magenta
gene.CpA0303946.1		97.1014	magenta
gene.CpB0603429.1		97.0346	magenta
gene.CpB0203332.1		96.9743	magenta
gene.CpA0405871.1		95.1718	magenta
gene.CpB0205627.1		94.6327	magenta
gene.CpB0200265.1		94.4209	magenta
gene.CpA0601054.1		94.2699	magenta
gene.CpB0403561.1		93.2819	magenta
gene.CpA0100792.1		92.5966	magenta
gene.CpA0302238.1		92.1026	magenta
gene.CpA0700954.1		91.2848	magenta
gene.CpA0600110.1		91.1624	magenta
gene.CpA0301341.1		91.049	magenta
gene.CpB0101710.1		90.7539	magenta
gene.CpA0204318.1		90.7537	magenta
gene.CpA0702729.1		90.7465	magenta
gene.CpA0103247.1		90.7085	magenta

## Sheet: tan
gene id	gene name	degree	module
gene.CpA0701107.1		32.2506	tan
gene.CpA0202265.1		31.7499	tan
gene.CpA0702780.1		31.2616	tan
gene.CpB0103297.1		30.5544	tan
gene.CpA0202256.1		28.3342	tan
gene.CpB0700954.1		27.8519	tan
gene.CpA0101990.1		27.7138	tan
gene.CpB0103401.1		27.66	tan
gene.CpA0300752.1		27.5856	tan
gene.CpA0200442.1		27.038	tan
gene.CpB0401464.1		26.0774	tan
gene.CpA0102849.1		25.5739	tan
gene.CpA0403417.1		25.0331	tan
gene.CpB0204987.1		24.7734	tan
gene.CpA0105577.1		24.6899	tan
gene.CpA0703397.1		24.3581	tan
gene.CpB0500186.1		24.3299	tan
gene.CpB0501146.1		23.9328	tan
gene.CpA0601309.1		23.8028	tan
gene.CpB0300982.1		23.5022	tan
gene.CpA0101985.1		23.0169	tan
gene.CpB0102210.1		22.8607	tan
gene.CpB0103289.1		22.7592	tan
gene.CpA0103028.1		22.4807	tan
gene.CpA0201611.1		22.2757	tan
gene.CpA0300184.1		22.0904	tan
gene.CpA0201626.1		21.6419	tan
gene.CpA0401857.1		21.1479	tan
gene.CpA0503874.1		20.9522	tan
gene.CpA0301966.1		20.9179	tan

## Sheet: salmon
gene id	gene name	degree	module
gene.CpB0202654.1		28.7809	salmon
gene.CpB0102523.1		27.5103	salmon
gene.CpB0403455.1		27.3891	salmon
gene.CpB0201645.1		26.886	salmon
gene.CpB0601038.1		25.9373	salmon
gene.CpB0301112.1		25.0573	salmon
gene.CpB0301789.1		24.3393	salmon
gene.CpB0102879.1		24.2776	salmon
gene.Cp0000455.1		23.9383	salmon
gene.CpA0703361.1		23.3472	salmon
gene.CpA0200018.1		22.3501	salmon
gene.CpB0205425.1		21.9047	salmon
gene.CpA0702908.1		21.8326	salmon
gene.CpA0104511.1		21.644	salmon
gene.CpB0402885.1		21.5255	salmon
gene.CpA0600127.1		21.1345	salmon
gene.CpB0104138.1		20.0814	salmon
gene.CpB0600438.1		19.8086	salmon
gene.CpA0303169.1		19.7848	salmon
gene.CpA0302161.1		19.4263	salmon
gene.CpA0102576.1		19.2243	salmon
gene.CpA0203545.1		18.9752	salmon
gene.CpA0600913.1		18.7483	salmon
gene.CpA0601774.1		18.556	salmon
gene.CpA0405118.1		17.9764	salmon
gene.CpA0303409.1		17.9407	salmon
gene.CpA0100739.1		17.9084	salmon
gene.CpA0603379.1		17.8215	salmon
gene.CpA0405164.1		17.7742	salmon
gene.CpA0702905.1		17.7304	salmon

## Sheet: yellow
gene id	gene name	degree	module
gene.CpA0103046.1		378.718	yellow
gene.CpA0600039.1		375.704	yellow
gene.CpB0203443.1		373.057	yellow
gene.CpB0101386.1		372.018	yellow
gene.CpA0302673.1		371.013	yellow
gene.CpA0701608.1		370.557	yellow
gene.CpB0501697.1		370.241	yellow
gene.CpB0103479.1		370.121	yellow
gene.CpA0101780.1		369.798	yellow
gene.CpA0602076.1		369.208	yellow
gene.CpB0204691.1		369.092	yellow
gene.CpA0404403.1		368.809	yellow
gene.CpA0204194.1		368.366	yellow
gene.CpA0403713.1		367.06	yellow
gene.CpA0104111.1		366.711	yellow
gene.CpA0505064.1		366.637	yellow
gene.CpA0702245.1		366.221	yellow
gene.CpA0601410.1		366.072	yellow
gene.CpA0102457.1		364.729	yellow
gene.CpB0102390.1		363.499	yellow
gene.CpB0205324.1		362.7	yellow
gene.CpA0500325.1		361.638	yellow
gene.CpA0200563.1		361.36	yellow
gene.CpA0400071.1		361.234	yellow
gene.CpB0203979.1		360.422	yellow
gene.CpA0201982.1		359.835	yellow
gene.CpB0700956.1		359.197	yellow
gene.CpB0600947.1		358.862	yellow
gene.CpB0104680.1		358.627	yellow
gene.CpA0403429.1		358.474	yellow

## Sheet: greenyellow
gene id	gene name	degree	module
gene.CpA0102214.1		31.8105	greenyellow
gene.CpA0201688.1		31.7241	greenyellow
gene.CpB0501993.1		31.4058	greenyellow
gene.CpB0102025.1		31.1937	greenyellow
gene.CpA0403853.1		30.9641	greenyellow
gene.CpA0303976.1		30.5944	greenyellow
gene.CpB0500657.1		28.9567	greenyellow
gene.CpA0104053.1		28.7222	greenyellow
gene.CpA0401973.1		27.3485	greenyellow
gene.CpB0401612.1		26.5367	greenyellow
gene.CpB0100922.1		25.9699	greenyellow
gene.CpA0202626.1		25.2465	greenyellow
gene.CpA0200212.1		24.2223	greenyellow
gene.CpB0100377.1		24.2171	greenyellow
gene.CpB0103374.1		23.7849	greenyellow
gene.CpB0401957.1		23.2111	greenyellow
gene.CpB0105196.1		23.113	greenyellow
gene.CpA0104368.1		23.0157	greenyellow
gene.CpA0104386.1		23.012	greenyellow
gene.CpB0400578.1		22.9698	greenyellow
gene.CpA0603672.1		22.9684	greenyellow
gene.CpB0601632.1		22.9284	greenyellow
gene.CpB0300719.1		22.7143	greenyellow
gene.CpA0603934.1		22.7109	greenyellow
gene.CpB0105488.1		22.5775	greenyellow
gene.CpB0300495.1		22.2039	greenyellow
gene.CpB0600613.1		22.1813	greenyellow
gene.CpB0104618.1		21.9369	greenyellow
gene.CpB0701127.1		21.6184	greenyellow
gene.CpA0100926.1		21.545	greenyellow
