# Supplementary material for: Combined analyses of transcriptome and metabolome reveal the mechanism of exogenous strigolactone regulating the response of elephant grass to drought stress
Source: Front Plant Sci. 2023 May 8;14:1186718. doi: 10.3389/fpls.2023.1186718 (PMC10200884; doi:10.3389/fpls.2023.1186718)
Supplement: Supplementary File 6 — The genes in the KEGG significant enrichment pathway in eight modules. [file DataSheet_6.xlsx]

## Sheet: blue
gene id	gene name
gene.CpA0104320.1
gene.CpB0400361.1
gene.CpA0202992.1
gene.CpA0103530.1
gene.CpA0700959.1
gene.CpA0301053.1
gene.CpB0701249.1
gene.CpA0100165.1
gene.CpA0100130.1
gene.CpB0700538.1
gene.CpA0401695.1
gene.CpB0500411.1
gene.CpA0403580.1
gene.CpA0100153.1
gene.CpA0402293.1
gene.CpA0201578.1
gene.CpA0301051.1
gene.CpB0302833.1
gene.CpA0704381.1
gene.CpA0100173.1
gene.CpA0101514.1
gene.CpA0602737.1
gene.CpB0603055.1
gene.CpA0101960.1
gene.CpA0301033.1
gene.CpB0102124.1
gene.CpA0401434.1
gene.CpB0204243.1
gene.CpA0301052.1
gene.CpB0303261.1
gene.CpA0103975.1
gene.CpA0301334.1
gene.CpB0600683.1
gene.CpA0503929.1
gene.CpB0102495.1
gene.CpA0100158.1
gene.CpA0204498.1
gene.CpA0204306.1
gene.CpA0504993.1
gene.CpB0500635.1
gene.CpA0101666.1
gene.CpA0502419.1
gene.CpA0102066.1
gene.CpB0601802.1
gene.CpA0102972.1
gene.CpA0501815.1
gene.CpA0102420.1
gene.CpB0602760.1
gene.CpA0500111.1
gene.CpA0501872.1
gene.CpA0204162.1
gene.CpA0203000.1
gene.CpB0105069.1
gene.CpB0301595.1
gene.CpB0205617.1
gene.CpB0500633.1
gene.CpA0600187.1
gene.CpB0205034.1
gene.CpA0302860.1
gene.CpB0200108.1
gene.CpB0203849.1
gene.CpB0500242.1
gene.CpA0102963.1
gene.CpA0504269.1
gene.CpA0204666.1
gene.CpA0601030.1
gene.CpB0602859.1
gene.CpB0205670.1
gene.CpB0500641.1
gene.CpB0501256.1
gene.Cp0001733.1
gene.CpB0602482.1
gene.CpA0700871.1
gene.CpA0100159.1
gene.CpA0600208.1
gene.CpB0101663.1
gene.CpA0102318.1
gene.CpA0700213.1
gene.CpA0502815.1
gene.CpB0104457.1
gene.CpA0403281.1
gene.CpA0103991.1
gene.CpA0700210.1
gene.CpA0504720.1
gene.CpB0104102.1
gene.CpB0205060.1
gene.CpA0100156.1
gene.CpA0200577.1
gene.CpB0201896.1
gene.CpB0202787.1
gene.CpB0102665.1
gene.CpA0103743.1
gene.CpB0105721.1
gene.CpA0600465.1
gene.CpB0502614.1
gene.CpB0302061.1
gene.CpB0205081.1
gene.CpB0401247.1
gene.CpB0204059.1
gene.CpB0401476.1
gene.CpB0501485.1
gene.CpA0103472.1
gene.CpB0400399.1
gene.CpB0400954.1
gene.CpA0403295.1
gene.CpA0405043.1
gene.CpB0104839.1
gene.CpB0101083.1
gene.CpA0201721.1
gene.CpA0703102.1
gene.CpB0301933.1
gene.CpB0702402.1
gene.CpA0103564.1
gene.CpA0102989.1
gene.CpA0400492.1
gene.CpA0301360.1
gene.CpA0303358.1
gene.CpA0405195.1
gene.CpB0303177.1
gene.CpB0702107.1
gene.CpA0700212.1
gene.CpA0101446.1
gene.CpA0503348.1
gene.CpB0702350.1
gene.CpA0501805.1
gene.CpB0204954.1
gene.CpA0501232.1
gene.CpB0102961.1
gene.CpB0104060.1
gene.CpB0201895.1
gene.CpB0200144.1
gene.CpA0701958.1
gene.CpB0300205.1
gene.CpA0403851.1
gene.CpB0701497.1
gene.CpA0601820.1
gene.CpB0202722.1
gene.CpB0600011.1
gene.CpB0101134.1
gene.CpA0103032.1
gene.CpB0103546.1
gene.CpB0401248.1
gene.CpA0104618.1
gene.CpA0700836.1
gene.CpB0205812.1
gene.CpB0500259.1
gene.CpA0100170.1
gene.CpB0105968.1
gene.CpB0402193.1
gene.CpA0703584.1
gene.CpA0501812.1
gene.CpB0202726.1
gene.CpA0700849.1
gene.CpA0503591.1
gene.CpA0704015.1
gene.CpB0503450.1
gene.CpA0204341.1
gene.CpA0402311.1
gene.CpA0204601.1
gene.Cp0000786.1
gene.CpB0600656.1
gene.CpB0204180.1
gene.CpA0103744.1
gene.CpA0500171.1
gene.CpA0104294.1
gene.CpB0201989.1
gene.CpA0603132.1
gene.CpA0504761.1
gene.CpA0105394.1
gene.CpA0105385.1
gene.CpB0101128.1
gene.CpB0201406.1
gene.CpB0201653.1
gene.CpA0303309.1
gene.CpA0201992.1
gene.CpB0202741.1
gene.CpB0601812.1
gene.CpB0302739.1
gene.CpA0100342.1
gene.CpB0503654.1

## Sheet: brown
gene id	gene name	gene description
gene.CpA0201470.1		-
gene.CpB0103508.1		-
gene.CpA0602250.1		-
gene.CpB0500827.1		-
gene.CpA0103171.1		-
gene.CpA0702875.1		-
gene.CpB0203288.1		-
gene.CpA0501592.1		-
gene.CpA0100505.1		-
gene.CpB0400913.1		-
gene.CpB0501592.1		-
gene.CpB0701949.1		-
gene.CpA0504573.1		-
gene.CpB0203289.1		-
gene.CpB0700955.1		-
gene.CpA0203786.1		-
gene.CpA0700120.1		-
gene.CpB0500817.1		-
gene.Cp0001629.1		-
gene.CpB0203926.1		-
gene.CpA0602229.1		-
gene.CpB0400773.1		-
gene.CpB0700953.1		-
gene.CpB0302340.1		-
gene.CpA0203312.1		-
gene.Cp0000243.1		-
gene.CpB0401230.1		-
gene.CpA0101254.1		-
gene.CpB0300910.1		-
gene.CpA0104253.1		-
gene.CpA0100749.1		-
gene.CpA0403145.1		-
gene.CpB0201766.1		-
gene.CpA0503927.1		-
gene.CpB0204684.1		-
gene.CpA0600500.1		-
gene.CpA0403822.1		-
gene.CpA0402383.1		-
gene.CpB0201679.1		-
gene.CpA0301860.1		-
gene.CpA0600615.1		-
gene.CpA0601301.1		-
gene.CpB0300462.1		-
gene.CpA0301077.1		-
gene.CpB0205710.1		-
gene.CpA0403144.1		-
gene.CpB0502064.1		-
gene.CpA0201739.1		-
gene.CpB0600619.1		-
gene.CpA0201369.1		-
gene.CpB0601900.1		-
gene.CpA0600531.1		-
gene.CpA0100504.1		-
gene.CpA0703017.1		-
gene.CpA0101297.1		-
gene.CpB0603327.1		-
gene.CpA0701874.1		-
gene.CpA0304022.1		-
gene.CpA0201736.1		-
gene.CpA0102464.1		-
gene.CpA0100506.1		-
gene.CpB0201576.1		-
gene.CpB0601049.1		-
gene.CpB0602034.1		-
gene.CpA0301078.1		-
gene.CpB0700236.1		-
gene.CpB0303556.1		-
gene.CpA0403301.1		-
gene.CpA0101185.1		-
gene.CpA0203246.1		-
gene.CpA0404110.1		-
gene.CpA0204089.1		-
gene.CpA0502426.1		-
gene.CpA0202338.1		-
gene.CpB0300542.1		-
gene.CpA0301960.1		-
gene.CpA0701438.1		-
gene.CpB0302265.1		-
gene.CpB0701147.1		-
gene.CpB0102151.1		-
gene.CpA0601260.1		-
gene.CpB0200706.1		-
gene.CpA0100842.1		-
gene.CpA0600528.1		-
gene.CpB0201877.1		-
gene.CpB0403209.1		-
gene.CpA0402409.1		-
gene.CpA0703657.1		-
gene.CpA0601930.1		-
gene.CpA0301066.1		-
gene.Cp0000241.1		-
gene.CpB0204077.1		-
gene.CpA0702876.1		-
gene.Cp0001266.1		-
gene.CpA0201915.1		-
gene.CpA0702367.1		-
gene.CpA0504512.1		-
gene.CpB0205003.1		-
gene.CpA0500508.1		-
gene.CpB0401685.1		-
gene.CpB0301762.1		-
gene.CpB0302266.1		-
gene.CpB0302034.1		-
gene.CpA0303121.1		-
gene.CpB0102937.1		-
gene.CpB0402969.1		-
gene.CpB0105373.1		-
gene.CpB0105077.1		-
gene.CpA0700271.1		-
gene.CpB0104010.1		-
gene.CpB0202899.1		-
gene.CpA0500364.1		-
gene.CpA0703662.1		-
gene.CpB0204410.1		-
gene.CpA0104827.1		-
gene.CpA0103611.1		-
gene.CpB0205652.1		-
gene.Cp0000045.1		-
gene.CpA0203967.1		-
gene.CpB0500695.1		-
gene.CpB0403490.1		-
gene.CpB0500291.1		-
gene.CpA0201368.1		-
gene.CpB0501545.1		-
gene.CpB0700814.1		-
gene.CpB0303558.1		-
gene.CpA0701325.1		-
gene.CpA0601951.1		-
gene.CpB0105011.1		-
gene.CpB0500498.1		-
gene.CpA0600487.1		-
gene.CpA0301943.1		-
gene.CpB0202455.1		-
gene.CpA0402506.1		-
gene.CpB0201656.1		-
gene.CpA0700201.1		-
gene.CpA0303000.1		-
gene.CpB0102639.1		-
gene.CpA0102761.1		-
gene.CpB0201674.1		-
gene.CpB0700530.1		-
gene.CpB0501309.1		-
gene.CpB0103916.1		-
gene.CpA0703116.1		-
gene.CpB0300890.1		-
gene.CpB0201863.1		-
gene.CpB0105333.1		-
gene.CpA0601386.1		-
gene.CpA0701914.1		-
gene.CpA0104767.1		-
gene.CpA0601929.1		-
gene.CpB0503554.1		-
gene.CpA0301791.1		-
gene.CpB0102268.1		-
gene.CpB0103887.1		-
gene.CpB0300920.1		-
gene.CpB0205647.1		-
gene.CpA0700269.1		-
gene.CpA0601802.1		-
gene.CpA0202535.1		-
gene.CpB0402966.1		-
gene.CpB0202144.1		-
gene.CpB0702381.1		-
gene.CpB0204539.1		-
gene.CpB0501674.1		-
gene.CpB0205645.1		-
gene.CpA0404025.1		-
gene.CpA0104602.1		-
gene.CpA0201607.1		-
gene.CpB0700569.1		-
gene.CpB0303557.1		-
gene.CpA0601554.1		-
gene.CpA0500547.1		-
gene.CpA0500428.1		-
gene.CpA0200283.1		-
gene.CpA0600955.1		-
gene.CpA0501627.1		-
gene.CpB0202173.1		-
gene.CpA0404276.1		-
gene.CpB0601845.1		-
gene.CpB0501090.1		-
gene.CpB0201383.1		-
gene.CpA0202452.1		-
gene.CpA0505079.1		-
gene.CpB0205712.1		-
gene.CpB0101401.1		-
gene.CpB0702043.1		-
gene.CpA0403140.1		-
gene.CpB0401691.1		-
gene.CpA0104495.1		-
gene.CpB0403373.1		-
gene.CpB0104795.1		-
gene.CpB0103652.1		-
gene.CpA0302950.1		-
gene.CpB0501866.1		-
gene.CpB0301761.1		-
gene.CpB0402905.1		-
gene.CpA0503926.1		-
gene.CpA0702873.1		-
gene.CpB0602794.1		-
gene.CpA0303885.1		-
gene.CpA0301112.1		-

## Sheet: turquoise
gene id	gene name	gene description
gene.CpA0400102.1		-
gene.CpB0503800.1		-
gene.CpA0603853.1		-
gene.CpA0603879.1		-
gene.CpA0603854.1		-
gene.CpB0204568.1		-
gene.CpA0303944.1		-
gene.CpA0405172.1		-
gene.CpA0501609.1		-
gene.CpA0500892.1		-
gene.CpA0503750.1		-
gene.CpA0100747.1		-
gene.CpB0301703.1		-
gene.CpA0103280.1		-
gene.CpB0401070.1		-
gene.CpA0702676.1		-
gene.CpA0402029.1		-
gene.CpA0301832.1		-
gene.CpA0405009.1		-
gene.CpB0501374.1		-
gene.CpB0403868.1		-
gene.CpA0503402.1		-
gene.CpA0600616.1		-
gene.CpB0503597.1		-
gene.CpA0504766.1		-
gene.CpA0602618.1		-
gene.CpA0600291.1		-
gene.CpB0402500.1		-
gene.CpA0400100.1		-
gene.CpB0103164.1		-
gene.CpA0302666.1		-
gene.CpA0401792.1		-
gene.CpA0600563.1		-
gene.CpA0402446.1		-
gene.CpB0401648.1		-
gene.CpA0700896.1		-
gene.CpA0404149.1		-
gene.CpA0404150.1		-
gene.CpA0401863.1		-
gene.CpB0203918.1		-
gene.CpA0402028.1		-
gene.CpB0600074.1		-
gene.CpB0202758.1		-
gene.CpB0102291.1		-
gene.CpB0203233.1		-
gene.CpA0400165.1		-
gene.CpB0502871.1		-
gene.CpB0401087.1		-
gene.CpB0204877.1		-
gene.CpA0602248.1		-
gene.CpA0500614.1		-
gene.CpA0602234.1		-
gene.CpA0701870.1		-
gene.CpA0405661.1		-
gene.CpA0103346.1		-
gene.CpA0400995.1		-
gene.CpB0502556.1		-
gene.CpB0203944.1		-
gene.CpA0104463.1		-
gene.CpA0403121.1		-
gene.CpA0602227.1		-
gene.CpA0405180.1		-
gene.CpA0202283.1		-
gene.CpB0600652.1		-
gene.CpA0101231.1		-
gene.CpA0404081.1		-
gene.CpB0101382.1		-
gene.CpA0300243.1		-
gene.CpA0300515.1		-
gene.CpB0303560.1		-
gene.CpA0405629.1		-
gene.CpA0602453.1		-
gene.CpB0201673.1		-
gene.CpA0105747.1		-
gene.CpA0402035.1		-
gene.CpB0303600.1		-
gene.Cp0001338.1		-
gene.CpB0202598.1		-
gene.CpB0202902.1		-
gene.CpA0204258.1		-
gene.Cp0000994.1		-
gene.CpA0502713.1		-
gene.CpA0602963.1		-
gene.CpB0700435.1		-
gene.CpB0403398.1		-
gene.CpB0702198.1		-
gene.CpA0404330.1		-
gene.CpA0402094.1		-
gene.CpA0302662.1		-
gene.CpA0700687.1		-
gene.CpA0702877.1		-
gene.CpB0104081.1		-
gene.CpA0101663.1		-
gene.CpA0601156.1		-
gene.CpB0104344.1		-
gene.CpA0303945.1		-
gene.CpA0100108.1		-
gene.CpA0101652.1		-
gene.CpB0601014.1		-
gene.CpA0402120.1		-
gene.CpA0405610.1		-
gene.CpA0600613.1		-
gene.CpA0701224.1		-
gene.CpB0502895.1		-
gene.CpB0501375.1		-
gene.CpA0401234.1		-
gene.CpA0400099.1		-
gene.CpA0101233.1		-
gene.CpB0502460.1		-
gene.CpB0400743.1		-
gene.CpA0501848.1		-
gene.CpA0104673.1		-
gene.CpB0102129.1		-
gene.CpB0602949.1		-
gene.CpA0400101.1		-
gene.CpA0603850.1		-
gene.CpB0203083.1		-
gene.CpA0603838.1		-
gene.CpB0602991.1		-
gene.CpA0401135.1		-
gene.CpB0203953.1		-
gene.CpB0203331.1		-
gene.CpB0204188.1		-
gene.CpA0102463.1		-
gene.CpB0200893.1		-
gene.Cp0001019.1		-
gene.CpB0402971.1		-
gene.CpA0704029.1		-
gene.CpA0601171.1		-
gene.CpA0300094.1		-
gene.CpA0701741.1		-
gene.CpA0100264.1		-
gene.CpA0204262.1		-
gene.CpB0102721.1		-
gene.CpA0103353.1		-
gene.CpA0601868.1		-
gene.CpB0205073.1		-
gene.CpB0200446.1		-
gene.CpA0702046.1		-
gene.CpA0701758.1		-
gene.CpB0400258.1		-
gene.CpB0205584.1		-
gene.CpB0502254.1		-
gene.CpB0402686.1		-
gene.CpA0603196.1		-
gene.CpB0501473.1		-
gene.CpB0203951.1		-
gene.CpB0602142.1		-
gene.CpA0404561.1		-
gene.CpA0404345.1		-
gene.CpA0202208.1		-
gene.CpB0200457.1		-
gene.CpA0700200.1		-
gene.CpB0603211.1		-
gene.CpA0200179.1		-
gene.CpA0601355.1		-
gene.CpA0700075.1		-
gene.CpB0200604.1		-
gene.CpB0602610.1		-
gene.CpA0102063.1		-
gene.CpA0701769.1		-
gene.CpA0502205.1		-
gene.CpB0104184.1		-
gene.CpA0702622.1		-
gene.CpA0501297.1		-
gene.CpB0100405.1		-
gene.CpA0702048.1		-
gene.CpB0103050.1		-
gene.CpB0603016.1		-
gene.CpB0402936.1		-
gene.Cp0000523.1		-
gene.CpA0600419.1		-
gene.CpA0601121.1		-
gene.CpA0502174.1		-
gene.CpB0302032.1		-
gene.CpB0500177.1		-
gene.CpA0201851.1		-
gene.CpA0103694.1		-
gene.CpA0102109.1		-
gene.CpB0402693.1		-
gene.CpB0401220.1		-
gene.CpA0302663.1		-
gene.CpB0202105.1		-
gene.CpB0201331.1		-
gene.CpA0200546.1		-
gene.CpA0501611.1		-
gene.CpB0402690.1		-
gene.CpB0200926.1		-
gene.CpB0700988.1		-
gene.CpB0500731.1		-
gene.CpA0503661.1		-
gene.CpA0603037.1		-
gene.CpB0200894.1		-
gene.CpA0303066.1		-
gene.CpA0703877.1		-
gene.CpB0203645.1		-
gene.CpB0102233.1		-
gene.CpB0205679.1		-
gene.CpA0402316.1		-
gene.CpB0402688.1		-
gene.CpB0501809.1		-
gene.Cp0000525.1		-
gene.CpA0602114.1		-
gene.CpB0301311.1		-
gene.CpA0602249.1		-
gene.CpA0501578.1		-
gene.CpB0700774.1		-
gene.CpA0103874.1		-
gene.CpA0303356.1		-
gene.CpA0703983.1		-
gene.CpA0703614.1		-
gene.CpB0200923.1		-
gene.CpB0600114.1		-
gene.CpB0502853.1		-
gene.CpA0702446.1		-
gene.CpB0601135.1		-
gene.CpA0204164.1		-
gene.Cp0001680.1		-
gene.CpA0103908.1		-
gene.CpB0400348.1		-
gene.CpA0504771.1		-
gene.CpB0100406.1		-
gene.CpA0501109.1		-
gene.Cp0000527.1		-
gene.CpA0400166.1		-
gene.CpB0701783.1		-
gene.CpA0502187.1		-
gene.CpA0502204.1		-
gene.CpA0401632.1		-
gene.CpA0100246.1		-
gene.CpB0402860.1		-
gene.CpA0202454.1		-
gene.CpA0703493.1		-
gene.CpB0500497.1		-
gene.CpA0403231.1		-
gene.CpB0403468.1		-
gene.CpA0601595.1		-
gene.CpA0401968.1		-
gene.CpA0403120.1		-
gene.CpB0303199.1		-
gene.CpB0402967.1		-
gene.CpB0602121.1		-
gene.CpB0100764.1		-
gene.CpB0601133.1		-
gene.CpB0700129.1		-
gene.CpB0205392.1		-
gene.CpA0603401.1		-
gene.CpB0403052.1		-
gene.CpA0402473.1		-
gene.CpA0603020.1		-
gene.CpA0200308.1		-
gene.CpB0204402.1		-
gene.CpB0602650.1		-
gene.CpB0202905.1		-
gene.CpA0702989.1		-
gene.CpB0603058.1		-
gene.CpA0601220.1		-
gene.CpA0703713.1		-
gene.CpB0403732.1		-
gene.CpA0505020.1		-
gene.CpA0405130.1		-
gene.CpA0103806.1		-
gene.CpA0702049.1		-
gene.CpA0603852.1		-
gene.CpA0703984.1		-
gene.CpA0404731.1		-
gene.CpB0204977.1		-
gene.CpB0101380.1		-
gene.CpA0404546.1		-
gene.CpB0203012.1		-
gene.CpB0204386.1		-
gene.CpB0201330.1		-
gene.CpA0100882.1		-
gene.CpA0401064.1		-
gene.CpB0204000.1		-
gene.CpB0600042.1		-
gene.CpA0603912.1		-
gene.CpA0601444.1		-
gene.CpA0401877.1		-
gene.CpA0100235.1		-
gene.CpA0504291.1		-
gene.CpA0203780.1		-
gene.CpA0701838.1		-
gene.CpA0504704.1		-
gene.CpA0700268.1		-
gene.CpB0403237.1		-
gene.CpB0402497.1		-
gene.CpB0105118.1		-
gene.CpB0200681.1		-
gene.CpA0500161.1		-
gene.CpB0402689.1		-
gene.CpB0205341.1		-
gene.CpB0303204.1		-
gene.CpA0602230.1		-
gene.CpA0404616.1		-
gene.CpA0502173.1		-
gene.CpB0102273.1		-
gene.CpB0104453.1		-
gene.CpB0701410.1		-
gene.CpB0104533.1		-
gene.CpA0204176.1		-
gene.CpB0401877.1		-
gene.CpB0503695.1		-
gene.CpB0502146.1		-
gene.CpA0703783.1		-
gene.CpA0302664.1		-
gene.CpA0702026.1		-
gene.CpA0702028.1		-
gene.CpB0402968.1		-
gene.CpB0700634.1		-
gene.CpB0103319.1		-
gene.CpB0203506.1		-
gene.CpB0600043.1		-
gene.CpA0601111.1		-
gene.CpB0102477.1		-
gene.CpA0105185.1		-
gene.CpB0302401.1		-
gene.CpA0602067.1		-
gene.CpB0100422.1		-
gene.CpB0403051.1		-
gene.CpB0204374.1		-
gene.CpA0301773.1		-
gene.CpB0103824.1		-
gene.CpA0200060.1		-
gene.CpA0201471.1		-
gene.Cp0000526.1		-
gene.Cp0000985.1		-
gene.CpB0602229.1		-
gene.CpA0701034.1		-
gene.CpA0504226.1		-
gene.CpB0401280.1		-
gene.CpA0403112.1		-
gene.Cp0000871.1		-
gene.CpA0601504.1		-
gene.CpA0504931.1		-
gene.CpA0404590.1		-
gene.CpB0603106.1		-
gene.CpA0504802.1		-
gene.CpB0600066.1		-
gene.CpB0602426.1		-
gene.CpA0402732.1		-
gene.CpB0103744.1		-
gene.CpA0603264.1		-
gene.CpA0301113.1		-
gene.CpA0704022.1		-
gene.CpB0301813.1		-
gene.CpB0700121.1		-
gene.CpA0103711.1		-
gene.CpA0502146.1		-
gene.CpA0504765.1		-
gene.CpA0701949.1		-
gene.CpA0501111.1		-
gene.CpB0500736.1		-
gene.CpA0700785.1		-
gene.CpB0700580.1		-
gene.CpA0501579.1		-
gene.CpB0602802.1		-
gene.CpA0603917.1		-
gene.CpA0405680.1		-
gene.CpA0701416.1		-
gene.CpB0104055.1		-
gene.CpB0202002.1		-
gene.CpB0104267.1		-
gene.CpB0600689.1		-
gene.CpB0300913.1		-
gene.CpA0701071.1		-
gene.CpB0501602.1		-
gene.CpA0304221.1		-
gene.CpA0302694.1		-
gene.CpB0104247.1		-
gene.CpB0500830.1		-
gene.CpA0202453.1		-
gene.CpB0205753.1		-
gene.CpB0602038.1		-
gene.CpA0202820.1		-
gene.CpA0703494.1		-
gene.CpB0600694.1		-
gene.CpA0103619.1		-
gene.CpB0401649.1		-
gene.CpB0402712.1		-
gene.CpA0604010.1		-
gene.CpB0102984.1		-
gene.CpA0502145.1		-
gene.CpB0105119.1		-
gene.CpA0500150.1		-
gene.CpA0103469.1		-
gene.CpB0103775.1		-
gene.CpB0600065.1		-
gene.CpB0101381.1		-
gene.CpA0603913.1		-
gene.CpB0502650.1		-
gene.CpA0702402.1		-
gene.CpB0203959.1		-
gene.CpA0601308.1		-
gene.CpA0602129.1		-
gene.CpB0203941.1		-
gene.CpB0101242.1		-
gene.CpB0204001.1		-
gene.CpB0204302.1		-
gene.CpB0200511.1		-
gene.CpA0702217.1		-
gene.CpB0602418.1		-
gene.CpB0205128.1		-
gene.CpA0402719.1		-
gene.CpA0504249.1		-
gene.CpB0203516.1		-
gene.CpA0601556.1		-
gene.CpA0702037.1		-
gene.CpB0401184.1		-
gene.CpB0402953.1		-
gene.CpA0600560.1		-
gene.CpB0502346.1		-
gene.CpA0601773.1		-
gene.CpA0302589.1		-
gene.CpA0700914.1		-
gene.CpA0702416.1		-
gene.CpB0700610.1		-
gene.CpA0400109.1		-
gene.CpA0703936.1		-
gene.CpB0300571.1		-
gene.CpA0701581.1		-
gene.CpB0201815.1		-
gene.CpA0400513.1		-
gene.CpA0504725.1		-
gene.CpB0203967.1		-
gene.CpB0402501.1		-
gene.CpA0501349.1		-
gene.CpB0205642.1		-
gene.CpA0302665.1		-
gene.CpB0600067.1		-
gene.CpB0700987.1		-
gene.CpB0106188.1		-
gene.CpB0501372.1		-
gene.CpB0600109.1		-
gene.CpA0501095.1		-
gene.CpA0103512.1		-
gene.CpA0603915.1		-
gene.CpB0303027.1		-
gene.Cp0001552.1		-
gene.CpA0702025.1		-
gene.CpA0503773.1		-
gene.CpB0503271.1		-
gene.CpB0104373.1		-
gene.CpA0401099.1		-

## Sheet: magenta
gene id	gene name
gene.CpB0203329.1
gene.CpB0203378.1
gene.CpB0203332.1
gene.CpB0401808.1
gene.CpA0701102.1
gene.CpA0503132.1
gene.CpA0502729.1
gene.CpB0601296.1

## Sheet: tan
gene id	gene name	gene description
gene.CpA0301298.1		-
gene.CpB0201563.1		-
gene.CpB0502412.1		-
gene.CpA0201626.1		-
gene.CpB0700954.1		-
gene.CpA0403417.1		-
gene.CpA0202265.1		-
gene.CpA0201611.1		-
gene.CpB0103297.1		-
gene.CpA0501649.1		-
gene.CpA0202256.1		-
gene.CpB0103289.1		-
gene.CpB0301529.1		-

## Sheet: salmon
gene id	gene name	gene description
gene.CpA0702908.1		-
gene.CpA0102576.1		-
gene.CpA0104389.1		-
gene.Cp0000455.1		-
gene.CpA0104511.1		-
gene.CpB0301112.1		-
gene.CpB0301326.1		-
gene.CpA0703361.1		-
gene.CpB0201645.1		-
gene.CpA0203545.1		-
gene.CpA0201939.1		-

## Sheet: yellow
gene id	gene name
gene.CpA0500682.1
gene.CpB0204407.1
gene.CpA0403274.1
gene.CpB0502308.1
gene.CpA0300131.1
gene.CpB0600138.1
gene.CpA0402569.1
gene.CpB0200148.1
gene.CpB0600277.1
gene.CpA0204460.1
gene.CpA0405420.1
gene.CpA0502061.1
gene.CpA0402605.1
gene.CpB0204928.1
gene.CpA0402567.1
gene.CpA0403288.1
gene.CpA0500213.1
gene.CpA0402871.1
gene.CpA0402662.1
gene.CpA0701549.1
gene.CpA0105661.1
gene.CpA0702489.1
gene.CpB0204398.1
gene.CpA0600922.1
gene.CpB0301950.1
gene.CpB0400766.1
gene.CpA0602169.1
gene.CpB0402094.1
gene.CpB0600123.1
gene.CpA0301942.1
gene.CpA0602043.1
gene.CpA0501844.1
gene.CpB0101838.1
gene.CpA0405408.1
gene.CpB0105981.1
gene.CpB0303098.1
gene.CpA0403706.1
gene.CpA0505027.1
gene.CpA0101723.1
gene.CpA0600864.1
gene.CpA0601417.1
gene.CpA0503342.1
gene.CpA0505037.1
gene.CpA0700993.1
gene.CpA0703266.1
gene.CpB0202315.1
gene.Cp0000609.1
gene.CpB0202499.1
gene.CpB0103800.1
gene.CpA0502180.1
gene.CpA0400341.1
gene.CpB0105479.1
gene.CpA0601883.1
gene.CpB0702146.1
gene.CpA0301961.1
gene.CpA0402733.1
gene.CpA0701024.1
gene.CpB0403019.1
gene.CpA0503341.1
gene.CpB0103776.1
gene.CpA0602010.1
gene.CpB0105249.1
gene.CpB0501055.1
gene.CpB0201709.1
gene.CpB0700529.1
gene.CpB0106036.1
gene.CpB0702264.1
gene.CpA0701798.1
gene.CpA0200672.1
gene.CpB0502209.1
gene.CpA0501864.1
gene.CpB0403635.1
gene.CpA0201692.1
gene.CpA0501633.1
gene.CpA0201732.1
gene.CpA0105045.1
gene.CpB0100756.1
gene.CpA0103248.1
gene.CpB0204408.1
gene.CpB0701805.1
gene.CpA0701780.1
gene.CpA0103944.1
gene.CpB0204397.1
gene.CpA0105279.1
gene.CpA0701548.1
gene.CpB0501732.1
gene.CpA0300755.1
gene.CpA0402427.1
gene.CpA0404264.1

## Sheet: greenyellow
gene id	gene name	gene description
gene.CpA0102214.1		-
gene.CpB0100382.1		-
gene.CpA0602869.1		-
gene.CpA0204471.1		-
gene.CpB0102025.1		-
gene.CpB0400578.1		-
gene.CpB0105196.1		-
gene.CpB0500657.1		-
gene.CpB0301334.1		-
gene.CpA0104386.1		-
gene.CpA0303976.1		-
gene.CpB0106029.1		-
