# Supplementary material for: Combined analyses of transcriptome and metabolome reveal the mechanism of exogenous strigolactone regulating the response of elephant grass to drought stress
Source: Front Plant Sci. 2023 May 8;14:1186718. doi: 10.3389/fpls.2023.1186718 (PMC10200884; doi:10.3389/fpls.2023.1186718)
Supplement: Supplementary File 7 — The top 30 hub genes in eight modules. [file DataSheet_7.xlsx]

## Sheet: blue
Gene_id	RSL	RD	RCK	LSL	LD	LCK	GO_id	GO_term	KO_id	KO_name	Pathway_id	Pathway_definition	COG_id	COG_Functional Categories	NR_hit-name	NR_description	Swiss-Prot_hit-name	Swiss-Prot_description	Pfam_id	Domain	Domain description
gene.CpA0100430.1	0.646667	0.6	0.063333	535.96	37.4833	112.83	GO:0009579;GO:0009570;GO:0046863;GO:000552	CC:thylakoid;CC:chloroplast stroma;MF:ribulose-1,5-bisphosphate carboxylase/oxygenase activator activity;MF:ATP binding;	------	------	------	------	COG1222	S:Function unknown	XP_014661172.1	ribulose bisphosphate carboxylase/oxygenase activase, chloroplastic [Setaria italica]	sp|P93431|RCA_ORYSJ;	Ribulose bisphosphate carboxylase/oxygenase activase, chloroplastic OS=Oryza sativa subsp. japonica OX=39947 GN=RCA PE=1 SV=2;	PF00004.30	AAA	ATPase family associated with various cellular activities
gene.CpA0101446.1	0	0.04	0.086667	1160.18	106.083	345.51	GO:0006094;GO:0005829;GO:0004612;GO:0016301;GO:000552	BP:gluconeogenesis;CC:cytosol;MF:phosphoenolpyruvate carboxykinas;MF:kinase activity;MF:ATP binding;	K01610	E4.1.1.49, pckA	map00020;map00010;map00620;map00710	Citrate cycle (TCA cycle);Glycolysis / Gluconeogenesis;Pyruvate metabolism;Carbon fixation in photosynthetic organisms	COG1866	C:Energy production and conversion	XP_025794669.1	phosphoenolpyruvate carboxykinase (ATP) [Panicum hallii]	sp|Q9SLZ0|PCKA_MAIZE;	Phosphoenolpyruvate carboxykinase;	PF01293.21	PEPCK_ATP	Phosphoenolpyruvate carboxykinase
gene.CpA0102392.1	0.02	0.256667	0.053333	31.3633	7.20667	10.8	GO:0008270;GO:001649	MF:zinc ion binding;MF:oxidoreductase activity;	K18980	EO, FaQR	------	------	COG0604	S:Function unknown	XP_034600409.1	2-methylene-furan-3-one reductase [Setaria viridis]	sp|K4BW79|ENOX_SOLLC;	2-methylene-furan-3-one reductase OS=Solanum lycopersicum OX=4081 GN=EO PE=1 SV=1;	PF13602.7;PF00107.27;PF08240.13	ADH_zinc_N_2;ADH_zinc_N;ADH_N	Zinc-binding dehydrogenase;Zinc-binding dehydrogenase;Alcohol dehydrogenase GroES-like domain
gene.CpA0105255.1	0	0	0	82.0933	16.2567	15.6767	------	------	------	------	------	------	COG0457;ENOG4111RZ7	S:Function unknown;	XP_034605868.1	uncharacterized protein LOC117865737 [Setaria viridis]	------	------	PF13432.7	TPR_16	Tetratricopeptide repeat
gene.CpA0105385.1	0.28	0.22	0.22	1447.79	229.703	404.507	GO:0030388;GO:0006096;GO:0006094;GO:0005737;GO:0005829;GO:0010287;GO:000433	BP:fructose 1,6-bisphosphate metabolic process;BP:glycolytic process;BP:gluconeogenesis;CC:cytoplasm;CC:cytosol;CC:plastoglobule;MF:fructose-bisphosphate aldolase activity;	K01623	ALDO	map00010;map00030;map00051;map00710	Glycolysis / Gluconeogenesis;Pentose phosphate pathway;Fructose and mannose metabolism;Carbon fixation in photosynthetic organisms	COG3588	G:Carbohydrate transport and metabolism	XP_004977254.1	fructose-bisphosphate aldolase, chloroplastic [Setaria italica]	sp|Q40677|ALFP_ORYSJ;	Fructose-bisphosphate aldolase, chloroplastic OS=Oryza sativa subsp. japonica OX=39947 GN=ALDP PE=1 SV=2;	PF00274.20	Glycolytic	Fructose-bisphosphate aldolase class-I
gene.CpA0200418.1	0.98	1.01	0.456667	159.073	31.3867	20.5733	GO:1904183;GO:0042593;GO:0043086;GO:0005739;GO:0005759;GO:0004674;GO:0004672;GO:0004740;GO:000552	BP:negative regulation of pyruvate dehydrogenase activity;BP:glucose homeostasis;BP:negative regulation of catalytic activity;CC:mitochondrion;CC:mitochondrial matrix;MF:protein serine/threonine kinase activity;MF:protein kinase activity;MF:pyruvate dehydrogenas;MF:ATP binding;	K00898	PDK2_3_4	------	------	COG0642	S:Function unknown	XP_004958460.1	pyruvate dehydrogenase (acetyl-transferring) kinase, mitochondrial [Setaria italica]	sp|Q9SBJ1|PDK_ARATH;	[Pyruvate dehydrogenase;	PF10436.10;PF02518.27;PF13589.7	BCDHK_Adom3;HATPase_c;HATPase_c_3	Mitochondrial branched-chain alpha-ketoacid dehydrogenase kinase;Histidine kinase-, DNA gyrase B-, and HSP90-like ATPase;Histidine kinase-, DNA gyrase B-, and HSP90-like ATPase
gene.CpA0301051.1	0	0	0	280.847	25.79	82.98	GO:0009853;GO:0015977;GO:0015979;GO:0009536;GO:0009507;GO:0004497;GO:001698	BP:photorespiration;BP:carbon fixation;BP:photosynthesis;CC:plastid;CC:chloroplast;MF:monooxygenase activity;MF:ribulose-bisphosphate carboxylase activity;	K01602	rbcS	map00630;map00710	Glyoxylate and dicarboxylate metabolism;Carbon fixation in photosynthetic organisms	COG4451	C:Energy production and conversion	BBE70303.1	ribulose-1,5-bisphosphate carboxylase/oxygenase small subunit [Cenchrus purpureus]	sp|P18566|RBS2_ORYSJ;	Ribulose bisphosphate carboxylase small chain A, chloroplastic OS=Oryza sativa subsp. japonica OX=39947 GN=RBCS-A PE=2 SV=2;	PF00101.21;PF12338.9	RuBisCO_small;RbcS	Ribulose bisphosphate carboxylase, small chain;Ribulose-1,5-bisphosphate carboxylase small subunit
gene.CpA0503348.1	0.023333	0	0.023333	661.72	108.007	124.303	GO:0009416;GO:0006006;GO:0019253;GO:0048046;GO:0009507;GO:0004365;GO:0051287;GO:0050661;GO:0016620;GO:004710	BP:response to light stimulus;BP:glucose metabolic process;BP:reductive pentose-phosphate cycle;CC:apoplast;CC:chloroplast;MF:glyceraldehyde-3-phosphate dehydrogenas;MF:NAD binding;MF:NADP binding;MF:oxidoreductase activity, acting on the aldehyde or oxo group of donors, NAD or NADP as acceptor;MF:glyceraldehyde-3-phosphate dehydrogenas;	K05298	GAPA	map00710	Carbon fixation in photosynthetic organisms	COG0057	G:Carbohydrate transport and metabolism	XP_004975847.1	glyceraldehyde-3-phosphate dehydrogenase A, chloroplastic [Setaria italica]	sp|P09315|G3PA_MAIZE;	Glyceraldehyde-3-phosphate dehydrogenase A, chloroplastic OS=Zea mays OX=4577 GN=GAPA PE=2 SV=1;	PF02800.21;PF00044.25	Gp_dh_C;Gp_dh_N	Glyceraldehyde 3-phosphate dehydrogenase, C-terminal domain;Glyceraldehyde 3-phosphate dehydrogenase, NAD binding domain
gene.CpA0504761.1	0.276667	0.11	0	64.1533	15.21	11.91	GO:0018298;GO:0009768;GO:0009416;GO:0009409;GO:0009645;GO:0009644;GO:0009765;GO:0009535;GO:0009782;GO:0009522;GO:0009523;GO:0016021;GO:0016168;GO:0031409;GO:004280	BP:protein-chromophore linkage;BP:photosynthesis, light harvesting in photosystem I;BP:response to light stimulus;BP:response to cold;BP:response to low light intensity stimulus;BP:response to high light intensity;BP:photosynthesis, light harvesting;CC:chloroplast thylakoid membrane;CC:photosystem I antenna complex;CC:photosystem I;CC:photosystem II;CC:integral component of membrane;MF:chlorophyl…	K08911	LHCA5	map00196	Photosynthesis - antenna proteins	ENOG4110J6A	S:Function unknown	XP_034575446.1	photosystem I chlorophyll a/b-binding protein 5, chloroplastic [Setaria viridis]	sp|Q9C639|LHCA5_ARATH;	Photosystem I chlorophyll a/b-binding protein 5, chloroplastic OS=Arabidopsis thaliana OX=3702 GN=LHCA5 PE=1 SV=1;	PF00504.22	Chloroa_b-bind	Chlorophyll A-B binding protein
gene.CpA0504993.1	7.16333	7.87667	7.37333	266.423	69.06	94.0533	GO:0006520;GO:0009409;GO:0009058;GO:0046686;GO:0048046;GO:0009941;GO:0009570;GO:0010319;GO:0008483;GO:0004069;GO:003017	BP:cellular amino acid metabolic process;BP:response to cold;BP:biosynthetic process;BP:response to cadmium ion;CC:apoplast;CC:chloroplast envelope;CC:chloroplast stroma;CC:stromule;MF:transaminase activity;MF:L-aspartat;MF:pyridoxal phosphate binding;	K00811	ASP5	map00220;map00270;map00330;map00950;map00250;map00360;map00350;map00960;map00400	Arginine biosynthesis;Cysteine and methionine metabolism;Arginine and proline metabolism;Isoquinoline alkaloid biosynthesis;Alanine, aspartate and glutamate metabolism;Phenylalanine metabolism;Tyrosine metabolism;Tropane, piperidine and pyridine alkaloid biosynthesis;Phenylalanine, tyrosine and tryptophan biosynthesis	COG1448	L:Replication, recombination and repair	XP_034577649.1	aspartate aminotransferase, chloroplastic [Setaria viridis]	sp|P46248|AAT5_ARATH;	Aspartate aminotransferase, chloroplastic OS=Arabidopsis thaliana OX=3702 GN=ASP5 PE=1 SV=2;	PF00155.22	Aminotran_1_2	Aminotransferase class I and II
gene.CpA0600181.1	0.04	0.19	0.266667	59.66	10.4233	16.5733	------	------	------	------	------	------	ENOG4111R6V;COG0624	S:Function unknown;	XP_034572209.1	uncharacterized protein LOC117836811 isoform X2 [Setaria viridis]	------	------	------	------	------
gene.CpA0600383.1	0.773333	0.973333	0.396667	59.8467	12.8233	14.9233	GO:0055085;GO:0016021;GO:0016020;GO:0005886;GO:0042626;GO:0016887;GO:000552	BP:transmembrane transport;CC:integral component of membrane;CC:membrane;CC:plasma membrane;MF:ATPase activity, coupled to transmembrane movement of substances;MF:ATPase activity;MF:ATP binding;	------	------	------	------	COG1131	S:Function unknown	XP_004985645.1	ABC transporter G family member 22 isoform X2 [Setaria italica]	sp|Q93YS4|AB22G_ARATH;	ABC transporter G family member 22 OS=Arabidopsis thaliana OX=3702 GN=ABCG22 PE=1 SV=1;	PF01061.25;PF00005.28;PF19055.1;PF12698.8	ABC2_membrane;ABC_tran;ABC2_membrane_7;ABC2_membrane_3	ABC-2 type transporter;ABC transporter;ABC-2 type transporter;ABC-2 family transporter protein
gene.CpA0601914.1	0	0	0.03	60.8467	14.0033	16.35	GO:0016021;GO:002285	CC:integral component of membrane;MF:transmembrane transporter activity;	------	------	------	------	COG0471	P:Inorganic ion transport and metabolism	XP_004984114.1	dicarboxylate transporter 2.1, chloroplastic [Setaria italica]	sp|Q9FMF7|DIT21_ARATH;	Dicarboxylate transporter 2.1, chloroplastic OS=Arabidopsis thaliana OX=3702 GN=DIT2-1 PE=1 SV=1;	PF00939.20	Na_sulph_symp	Sodiu
gene.CpA0700513.1	0.173333	0.186667	0.12	193.92	22.4567	27.41	GO:0005985;GO:0005986;GO:0005794;GO:0046524;GO:001615	BP:sucrose metabolic process;BP:sucrose biosynthetic process;CC:Golgi apparatus;MF:sucrose-phosphate synthase activity;MF:sucrose synthase activity;	K00696	E2.4.1.14	map00500	Starch and sucrose metabolism	COG0438	O:Posttranslational modification, protein turnover, chaperones	XP_004971066.2	sucrose-phosphate synthase [Setaria italica]	sp|P31927|SPSA_MAIZE;	Sucrose-phosphate synthase OS=Zea mays OX=4577 GN=SPS PE=1 SV=1;	PF00534.21;PF05116.14;PF13692.7;PF00862.20;PF13579.7;PF13439.7;PF13524.7	Glycos_transf_1;S6PP;Glyco_trans_1_4;Sucrose_synth;Glyco_trans_4_4;Glyco_transf_4;Glyco_trans_1_2	Glycosyl transferases group 1;Sucrose-6F-phosphate phosphohydrolase;Glycosyl transferases group 1;Sucrose synthase;Glycosyl transferase 4-like domain;Glycosyltransferase Family 4;Glycosyl transferases group 1
gene.CpA0700660.1	0.383333	0.36	0.056667	52.2067	14.0867	15.0233	GO:0009534;GO:000563	CC:chloroplast thylakoid;CC:nucleus;	------	------	------	------	ENOG4111046	S:Function unknown	XP_034593712.1	uncharacterized protein LOC117855463 [Setaria viridis]	sp|B6TVL4|CAS_MAIZE;	Calcium sensing receptor, chloroplastic OS=Zea mays OX=4577 PE=1 SV=1;	PF00581.21	Rhodanese	Rhodanese-like domain
gene.CpA0700959.1	0.043333	0	0	411.977	60.2767	98.1833	GO:0005986;GO:0030388;GO:0005975;GO:0006000;GO:0006002;GO:0006094;GO:0005737;GO:0042132;GO:001679	BP:sucrose biosynthetic process;BP:fructose 1,6-bisphosphate metabolic process;BP:carbohydrate metabolic process;BP:fructose metabolic process;BP:fructose 6-phosphate metabolic process;BP:gluconeogenesis;CC:cytoplasm;MF:fructose 1,6-bisphosphate 1-phosphatase activity;MF:phosphatase activity;	K01100	E3.1.3.37	map00710	Carbon fixation in photosynthetic organisms	COG0158	S:Function unknown	XP_004970606.1	sedoheptulose-1,7-bisphosphatase, chloroplastic [Setaria italica]	sp|P46285|S17P_WHEAT;	Sedoheptulose-1,7-bisphosphatase, chloroplastic OS=Triticum aestivum OX=4565 PE=2 SV=1;	PF00316.21;PF18913.1	FBPase;FBPase_C	Fructose-1-6-bisphosphatase, N-terminal domain;Fructose-1-6-bisphosphatase, C-terminal domain
gene.CpB0104060.1	2	1.24	3.51	274.737	62.5033	54.34	GO:0046686;GO:1903862;GO:0006096;GO:0006094;GO:0005829;GO:0043531;GO:0004618;GO:000552	BP:response to cadmium ion;BP:positive regulation of oxidative phosphorylation;BP:glycolytic process;BP:gluconeogenesis;CC:cytosol;MF:ADP binding;MF:phosphoglycerate kinase activity;MF:ATP binding;	K00927	PGK, pgk	map00010;map00710	Glycolysis / Gluconeogenesis;Carbon fixation in photosynthetic organisms	COG0126	S:Function unknown	XP_004961633.1	phosphoglycerate kinase, chloroplastic [Setaria italica]	sp|P12782|PGKH_WHEAT;	Phosphoglycerate kinase, chloroplastic OS=Triticum aestivum OX=4565 PE=2 SV=1;	PF00162.20	PGK	Phosphoglycerate kinase
gene.CpB0105721.1	0	0	0.09	1080.9	200.477	281.297	GO:0030388;GO:0006096;GO:0006094;GO:0005737;GO:0005829;GO:0010287;GO:000433	BP:fructose 1,6-bisphosphate metabolic process;BP:glycolytic process;BP:gluconeogenesis;CC:cytoplasm;CC:cytosol;CC:plastoglobule;MF:fructose-bisphosphate aldolase activity;	K01623	ALDO	map00010;map00030;map00051;map00710	Glycolysis / Gluconeogenesis;Pentose phosphate pathway;Fructose and mannose metabolism;Carbon fixation in photosynthetic organisms	COG3588	T:Signal transduction mechanisms	XP_004977254.1	fructose-bisphosphate aldolase, chloroplastic [Setaria italica]	sp|Q40677|ALFP_ORYSJ;	Fructose-bisphosphate aldolase, chloroplastic OS=Oryza sativa subsp. japonica OX=39947 GN=ALDP PE=1 SV=2;	PF00274.20	Glycolytic	Fructose-bisphosphate aldolase class-I
gene.CpB0202658.1	1.25667	0.673333	0.713333	422.09	72.29	150.863	GO:0009579;GO:0009570;GO:0046863;GO:000552	CC:thylakoid;CC:chloroplast stroma;MF:ribulose-1,5-bisphosphate carboxylase/oxygenase activator activity;MF:ATP binding;	------	------	------	------	COG1222	O:Posttranslational modification, protein turnover, chaperones	XP_014661172.1	ribulose bisphosphate carboxylase/oxygenase activase, chloroplastic [Setaria italica]	sp|P93431|RCA_ORYSJ;	Ribulose bisphosphate carboxylase/oxygenase activase, chloroplastic OS=Oryza sativa subsp. japonica OX=39947 GN=RCA PE=1 SV=2;	PF00004.30	AAA	ATPase family associated with various cellular activities
gene.CpB0202678.1	0.09	0.113333	0.066667	124.957	22.86	36.1567	GO:0009579;GO:0009570;GO:0046863;GO:000552	CC:thylakoid;CC:chloroplast stroma;MF:ribulose-1,5-bisphosphate carboxylase/oxygenase activator activity;MF:ATP binding;	------	------	------	------	COG1222	O:Posttranslational modification, protein turnover, chaperones	XP_014661172.1	ribulose bisphosphate carboxylase/oxygenase activase, chloroplastic [Setaria italica]	sp|P93431|RCA_ORYSJ;	Ribulose bisphosphate carboxylase/oxygenase activase, chloroplastic OS=Oryza sativa subsp. japonica OX=39947 GN=RCA PE=1 SV=2;	PF00004.30	AAA	ATPase family associated with various cellular activities
gene.CpB0204954.1	0	0	0	258.053	37.9733	71.8633	GO:0005986;GO:0030388;GO:0005975;GO:0006000;GO:0006002;GO:0006094;GO:0005737;GO:0042132;GO:001679	BP:sucrose biosynthetic process;BP:fructose 1,6-bisphosphate metabolic process;BP:carbohydrate metabolic process;BP:fructose metabolic process;BP:fructose 6-phosphate metabolic process;BP:gluconeogenesis;CC:cytoplasm;MF:fructose 1,6-bisphosphate 1-phosphatase activity;MF:phosphatase activity;	K01100	E3.1.3.37	map00710	Carbon fixation in photosynthetic organisms	COG0158	G:Carbohydrate transport and metabolism	XP_004970606.1	sedoheptulose-1,7-bisphosphatase, chloroplastic [Setaria italica]	sp|P46285|S17P_WHEAT;	Sedoheptulose-1,7-bisphosphatase, chloroplastic OS=Triticum aestivum OX=4565 PE=2 SV=1;	PF00316.21;PF18913.1	FBPase;FBPase_C	Fructose-1-6-bisphosphatase, N-terminal domain;Fructose-1-6-bisphosphatase, C-terminal domain
gene.CpB0205060.1	0.013333	0	0.04	94.8767	26.1567	16.6033	GO:0009644;GO:0010196;GO:0009535;GO:0016021;GO:000950	BP:response to high light intensity;BP:nonphotochemical quenching;CC:chloroplast thylakoid membrane;CC:integral component of membrane;CC:chloroplast;	K03542	psbS	map00195	Photosynthesis	ENOG4111VNI	I:Lipid transport and metabolism	XP_004970722.1	photosystem II 22 kDa protein, chloroplastic [Setaria italica]	sp|A2WXD9|PSBS1_ORYSI;	Photosystem II 22 kDa protein 1, chloroplastic OS=Oryza sativa subsp. indica OX=39946 GN=PSBS1 PE=1 SV=1;	PF00504.22	Chloroa_b-bind	Chlorophyll A-B binding protein
gene.CpB0205081.1	0	0	0	647.183	177.523	103.207	GO:0010196;GO:0009644;GO:0015979;GO:0009535;GO:0009523;GO:0016021;GO:000950	BP:nonphotochemical quenching;BP:response to high light intensity;BP:photosynthesis;CC:chloroplast thylakoid membrane;CC:photosystem II;CC:integral component of membrane;CC:chloroplast;	K03542	psbS	map00195	Photosynthesis	ENOG4111VNI	I:Lipid transport and metabolism	XP_004970722.1	photosystem II 22 kDa protein, chloroplastic [Setaria italica]	sp|A2WXD9|PSBS1_ORYSI;	Photosystem II 22 kDa protein 1, chloroplastic OS=Oryza sativa subsp. indica OX=39946 GN=PSBS1 PE=1 SV=1;	PF00504.22	Chloroa_b-bind	Chlorophyll A-B binding protein
gene.CpB0205287.1	0.346667	0.746667	0.106667	126.62	30.4	30.0233	GO:0009534;GO:000563	CC:chloroplast thylakoid;CC:nucleus;	------	------	------	------	ENOG4111046	S:Function unknown	XP_034593712.1	uncharacterized protein LOC117855463 [Setaria viridis]	sp|B6TVL4|CAS_MAIZE;	Calcium sensing receptor, chloroplastic OS=Zea mays OX=4577 PE=1 SV=1;	PF00581.21	Rhodanese	Rhodanese-like domain
gene.CpB0205440.1	1.53667	1.00333	1.34333	77.2967	15.33	22.1933	GO:0005985;GO:0005986;GO:0005794;GO:0046524;GO:001615	BP:sucrose metabolic process;BP:sucrose biosynthetic process;CC:Golgi apparatus;MF:sucrose-phosphate synthase activity;MF:sucrose synthase activity;	K00696	E2.4.1.14	map00500	Starch and sucrose metabolism	COG0438	M:Cell wall/membrane/envelope biogenesis	XP_004971066.2	sucrose-phosphate synthase [Setaria italica]	sp|P31927|SPSA_MAIZE;	Sucrose-phosphate synthase OS=Zea mays OX=4577 GN=SPS PE=1 SV=1;	PF00534.21;PF05116.14;PF13692.7;PF00862.20;PF13579.7;PF13439.7;PF13524.7	Glycos_transf_1;S6PP;Glyco_trans_1_4;Sucrose_synth;Glyco_trans_4_4;Glyco_transf_4;Glyco_trans_1_2	Glycosyl transferases group 1;Sucrose-6F-phosphate phosphohydrolase;Glycosyl transferases group 1;Sucrose synthase;Glycosyl transferase 4-like domain;Glycosyltransferase Family 4;Glycosyl transferases group 1
gene.CpB0500515.1	0.43	0.616667	0.16	74.06	18.65	28.15	GO:0055085;GO:0016021;GO:0016020;GO:0005886;GO:0042626;GO:0016887;GO:000552	BP:transmembrane transport;CC:integral component of membrane;CC:membrane;CC:plasma membrane;MF:ATPase activity, coupled to transmembrane movement of substances;MF:ATPase activity;MF:ATP binding;	------	------	------	------	COG1131	V:Defense mechanisms	XP_004985644.1	ABC transporter G family member 22 isoform X1 [Setaria italica]	sp|Q93YS4|AB22G_ARATH;	ABC transporter G family member 22 OS=Arabidopsis thaliana OX=3702 GN=ABCG22 PE=1 SV=1;	PF01061.25;PF19055.1;PF12698.8;PF00005.28	ABC2_membrane;ABC2_membrane_7;ABC2_membrane_3;ABC_tran	ABC-2 type transporter;ABC-2 type transporter;ABC-2 family transporter protein;ABC transporter
gene.CpB0500909.1	0.06	0.186667	0.29	31.1233	8.34667	9.99333	GO:0006898;GO:0072583;GO:0072318;GO:0005737;GO:0043231;GO:0031982;GO:003027	BP:receptor-mediated endocytosis;BP:clathrin-dependent endocytosis;BP:clathrin coat disassembly;CC:cytoplasm;CC:intracellular membrane-bounded organelle;CC:vesicle;MF:clathrin binding;	------	------	------	------	ENOG410XNRK;ENOG4112A27;ENOG410YGT5	O:Posttranslational modification, protein turnover, chaperones;S:Function unknown	XP_004985332.2	J domain-containing protein required for chloroplast accumulation response 1 [Setaria italica]	sp|Q9C9Q4|JAC1_ARATH;	J domain-containing protein required for chloroplast accumulation response 1 OS=Arabidopsis thaliana OX=3702 GN=JAC1 PE=1 SV=1;	------	------	------
gene.CpB0501978.1	1.85	0.403333	1.78	118.707	29.6367	30.9267	GO:0009570;GO:0009941;GO:0016616;GO:001649	CC:chloroplast stroma;CC:chloroplast envelope;MF:oxidoreductase activity, acting on the CH-OH group of donors, NAD or NADP as acceptor;MF:oxidoreductase activity;	------	------	------	------	COG0702	J:Translation, ribosomal structure and biogenesis	XP_004984340.1	sanguinarine reductase [Setaria italica]	sp|O80934|Y2766_ARATH;	Uncharacterized protein At2g37660, chloroplastic OS=Arabidopsis thaliana OX=3702 GN=At2g37660 PE=1 SV=2;	PF13460.7;PF05368.14;PF01073.20;PF01370.22	NAD_binding_10;NmrA;3Beta_HSD;Epimerase	NA;NmrA-like family;3-beta hydroxysteroid dehydrogenase/isomerase family;NAD dependent epimerase/dehydratase family
gene.CpB0502221.1	0	0	0	66.8167	8.56667	12.3267	GO:0016021;GO:002285	CC:integral component of membrane;MF:transmembrane transporter activity;	------	------	------	------	COG0471	S:Function unknown	XP_004984114.1	dicarboxylate transporter 2.1, chloroplastic [Setaria italica]	sp|Q8L7Z9|DIT2_SPIOL;	Dicarboxylate transporter 2, chloroplastic OS=Spinacia oleracea OX=3562 GN=DIT2 PE=1 SV=1;	PF00939.20;PF03600.17	Na_sulph_symp;CitMHS	Sodiu;Citrate transporter
gene.CpB0700538.1	0	0.063333	0.023333	475.767	104.543	122.177	GO:0009416;GO:0006006;GO:0019253;GO:0048046;GO:0009507;GO:0004365;GO:0051287;GO:0050661;GO:0016620;GO:004710	BP:response to light stimulus;BP:glucose metabolic process;BP:reductive pentose-phosphate cycle;CC:apoplast;CC:chloroplast;MF:glyceraldehyde-3-phosphate dehydrogenas;MF:NAD binding;MF:NADP binding;MF:oxidoreductase activity, acting on the aldehyde or oxo group of donors, NAD or NADP as acceptor;MF:glyceraldehyde-3-phosphate dehydrogenas;	K05298	GAPA	map00710	Carbon fixation in photosynthetic organisms	COG0057	S:Function unknown	XP_004975847.1	glyceraldehyde-3-phosphate dehydrogenase A, chloroplastic [Setaria italica]	sp|P09315|G3PA_MAIZE;	Glyceraldehyde-3-phosphate dehydrogenase A, chloroplastic OS=Zea mays OX=4577 GN=GAPA PE=2 SV=1;	PF02800.21;PF00044.25	Gp_dh_C;Gp_dh_N	Glyceraldehyde 3-phosphate dehydrogenase, C-terminal domain;Glyceraldehyde 3-phosphate dehydrogenase, NAD binding domain

## Sheet: brown
Gene_id	RSL	RD	RCK	LSL	LD	LCK	GO_id	GO_term	KO_id	KO_name	Pathway_id	Pathway_definition	COG_id	COG_Functional Categories	NR_hit-name	NR_description	Swiss-Prot_hit-name	Swiss-Prot_description	Pfam_id	Domain	Domain description
gene.CpA0100504.1	9.05667	10.7333	44.1567	0.366667	0.066667	1.73	GO:0005975;GO:0045493;GO:0005576;GO:0004568;GO:001679	BP:carbohydrate metabolic process;BP:xylan catabolic process;CC:extracellular region;MF:chitinase activity;MF:hydrolase activity, acting on glycosyl bonds;	K01183	E3.2.1.14	map00520	Amino sugar and nucleotide sugar metabolism	ENOG4111GPA	G:Carbohydrate transport and metabolism	XP_004979369.1	xylanase inhibitor protein 1 [Setaria italica]	sp|Q8L5C6|XIP1_WHEAT;	Xylanase inhibitor protein 1 OS=Triticum aestivum OX=4565 GN=XIPI PE=1 SV=2;	PF00704.29	Glyco_hydro_18	Glycosyl hydrolases family 18
gene.CpA0103396.1	14.71	8.44333	58.3733	2.22	1.15667	2.85333	GO:0045487;GO:0016021;GO:0005789;GO:0004497;GO:0020037;GO:0016705;GO:000550	BP:gibberellin catabolic process;CC:integral component of membrane;CC:endoplasmic reticulum membrane;MF:monooxygenase activity;MF:heme binding;MF:oxidoreductase activity, acting on paired donors, with incorporation or reduction of molecular oxygen;MF:iron ion binding;	K20663	CYP714D1	------	------	COG2124	Q:Secondary metabolites biosynthesis, transport and catabolism	XP_034583809.1	cytochrome P450 714D1-like [Setaria viridis]	sp|Q5KQH7|C14D1_ORYSJ;	Cytochrome P450 714D1 OS=Oryza sativa subsp. japonica OX=39947 GN=CYP714D1 PE=1 SV=1;	PF00067.23	p450	Cytochrome P450
gene.CpA0203312.1	2.24	2.38667	11.21	0.053333	0	0.26	GO:0009308;GO:0048038;GO:0005507;GO:000813	BP:amine metabolic process;MF:quinone binding;MF:copper ion binding;MF:primary amine oxidase activity;	K00276	AOC3, AOC2, tynA	map00260;map00960;map00950;map00360;map00350;map00410	Glycine, serine and threonine metabolism;Tropane, piperidine and pyridine alkaloid biosynthesis;Isoquinoline alkaloid biosynthesis;Phenylalanine metabolism;Tyrosine metabolism;beta-Alanine metabolism	COG3733	Q:Secondary metabolites biosynthesis, transport and catabolism	PAN10139.1	hypothetical protein PAHAL_2G074000 [Panicum hallii]	sp|P0DO00|AMO2_ARATH;	Primary amine oxidase 2 OS=Arabidopsis thaliana OX=3702 GN=At1g31672 PE=3 SV=1;	PF01179.21;PF02728.17;PF02727.17	Cu_amine_oxid;Cu_amine_oxidN3;Cu_amine_oxidN2	Copper amine oxidase, enzyme domain;Copper amine oxidase, N3 domain;Copper amine oxidase, N2 domain
gene.CpA0301066.1	47.3867	15.83	483.67	0	0	0.02	GO:0032259;GO:0019438;GO:0008757;GO:0046983;GO:000817	BP:methylation;BP:aromatic compound biosynthetic process;MF:S-adenosylmethionine-dependent methyltransferase activity;MF:protein dimerization activity;MF:O-methyltransferase activity;	K16040;sbi	ROMT;	map00945	Stilbenoid, diarylheptanoid and gingerol biosynthesis	ENOG410XS7T	O:Posttranslational modification, protein turnover, chaperones	A8QW51.1;	;Short=SbOMT2 [Sorghum bicolor]	sp|A8QW51|OMT2_SORBI;	Probable O-methyltransferase 2 OS=Sorghum bicolor OX=4558 GN=OMT2 PE=2 SV=1;	PF00891.19;PF08100.12	Methyltransf_2;Dimerisation	O-methyltransferase domain;Dimerisation domain
gene.CpA0303255.1	2.99333	2.32667	6.92	0.24	0.086667	0.463333	GO:0006355;GO:0009734;GO:0005634;GO:000367	BP:regulation of transcription, DNA-templated;BP:auxin-activated signaling pathway;CC:nucleus;MF:DNA binding;	------	------	------	------	ENOG4110RNJ	K:Transcription	XP_020261177.1	auxin response factor 2-like isoform X2 [Asparagus officinalis]	sp|Q5JK20|ARFD_ORYSJ;	Auxin response factor 4 OS=Oryza sativa subsp. japonica OX=39947 GN=ARF4 PE=2 SV=1;	PF03081.16;PF06507.14;PF02362.22	Exo70;Auxin_resp;B3	Exo70 exocyst complex subunit;Auxin response factor;B3 DNA binding domain
gene.CpA0402467.1	13.8533	10.28	106.35	0.656667	0.87	1.50667	GO:0016121;GO:0009570;GO:0009507;GO:0016702;GO:0046872;GO:001043	BP:carotene catabolic process;CC:chloroplast stroma;CC:chloroplast;MF:oxidoreductase activity, acting on single donors with incorporation of molecular oxygen, incorporation of two atoms of oxygen;MF:metal ion binding;MF:carotenoid dioxygenase activity;	------	------	------	------	COG3670;ENOG410Y26G	Q:Secondary metabolites biosynthesis, transport and catabolism;S:Function unknown	KXG19379.2	hypothetical protein SORBI_3010G050300 [Sorghum bicolor]	sp|Q8LP17|CCD1_PEA;	Carotenoid 9,1;	PF03055.16	RPE65	Retinal pigment epithelial membrane protein
gene.CpA0403655.1	21.1733	26.99	245.8	2.94667	1.58667	4.71333	GO:000823	MF:peptidase activity;	------	------	------	------	ENOG4111I5H	S:Function unknown	CAB3499289.1	unnamed protein product [Digitaria exilis]	sp|C0HJG8|BSP_BOSSE;	Basic secretory protease;	PF04450.13	BSP	Peptidase of plants and bacteria
gene.CpA0405866.1	14.3433	7.88667	33.3767	0.083333	0.073333	0.576667	GO:0046872;GO:0051213;GO:001649	MF:metal ion binding;MF:dioxygenase activity;MF:oxidoreductase activity;	------	------	------	------	COG3491	S:Function unknown	XP_004980988.1	S-norcoclaurine synthase 1 [Setaria italica]	sp|Q39224|SRG1_ARATH;	Protein SRG1 OS=Arabidopsis thaliana OX=3702 GN=SRG1 PE=2 SV=1;	PF14226.7;PF03171.21	DIOX_N;2OG-FeII_Oxy	non-haem dioxygenase in morphine synthesis N-terminal;2OG-F
gene.CpA0501850.1	3.88	4.77	21.66	0	0	0.193333	GO:0005634;GO:0046983;GO:000122	CC:nucleus;MF:protein dimerization activity;MF:transcriptional activator activity, RNA polymerase II transcription regulatory region sequence-specific binding;	------	------	------	------	ENOG41103M6	S:Function unknown	XP_034602013.1	transcription factor bHLH128-like [Setaria viridis]	sp|Q8H102|BH128_ARATH;	Transcription factor bHLH128 OS=Arabidopsis thaliana OX=3702 GN=BHLH128 PE=1 SV=1;	PF00010.27	HLH	Helix-loop-helix DNA-binding domain
gene.CpA0503188.1	6.13333	3.31333	12.3333	0.556667	0.22	1.03667	GO:0071108;GO:0005634;GO:0019784;GO:0004843;GO:004313	BP:protein K48-linked deubiquitination;CC:nucleus;MF:NEDD8-specific protease activity;MF:thiol-dependent ubiquitin-specific protease activity;MF:ubiquitin binding;	K09602	OTUB1	------	------	ENOG410ZMN7	O:Posttranslational modification, protein turnover, chaperones	RCV06573.1	hypothetical protein SETIT_1G173600v2 [Setaria italica]	sp|Q8LG98|OTU1_ARATH;	OVARIAN TUMOR DOMAIN-containing deubiquitinating enzyme 1 OS=Arabidopsis thaliana OX=3702 GN=OTU1 PE=1 SV=2;	PF10275.10	Peptidase_C65	Peptidase C65 Otubain
gene.CpA0504842.1	13.0967	9.42	51.4933	0.74	0.143333	0.333333	GO:0005524;GO:000467	MF:ATP binding;MF:protein kinase activity;	------	------	------	------	COG0515	T:Signal transduction mechanisms	XP_034576512.1	serine/threonine-protein kinase RIPK-like [Setaria viridis]	sp|Q9ZUF4|RIPK_ARATH;	Serine/threonine-protein kinase RIPK OS=Arabidopsis thaliana OX=3702 GN=RIPK PE=1 SV=1;	PF00069.26;PF07714.18	Pkinase;PK_Tyr_Ser-Thr	Protein kinase domain;Protein tyrosine and serine/threonine kinase
gene.CpA0600308.1	23.35	21.73	205.237	0	0	0.093333	GO:0055114;GO:0003955;GO:001018	BP:oxidation-reduction process;MF:NA;MF:FMN binding;	K03809	wrbA	map00130	Ubiquinone and other terpenoid-quinone biosynthesis	COG0655	S:Function unknown	XP_002461308.1	probable NAD(P)H dehydrogenase (quinone) FQR1-like 1 [Sorghum bicolor]	sp|Q9AYU0|QR2_TRIVS;	Quinone-oxidoreductase QR2 OS=Triphysaria versicolor OX=64093 PE=1 SV=1;	PF03358.16;PF02525.18	FMN_red;Flavodoxin_2	NADPH-dependent FMN reductase;Flavodoxin-like fold
gene.CpA0600615.1	29.01	26.89	138.663	0.586667	1.3	2.51	GO:0046294;GO:0005829;GO:0004024;GO:0008270;GO:0051903;GO:001649	BP:formaldehyde catabolic process;CC:cytosol;MF:alcohol dehydrogenase activity, zinc-dependent;MF:zinc ion binding;MF:S;MF:oxidoreductase activity;	K00121	frmA, ADH5, adhC	map00010;map00071;map00350	Glycolysis / Gluconeogenesis;Fatty acid degradation;Tyrosine metabolism	COG1062	C:Energy production and conversion	XP_004985404.1	alcohol dehydrogenase-like 5 [Setaria italica]	sp|Q0V7W6|ADHL5_ARATH;	Alcohol dehydrogenase-like 5 OS=Arabidopsis thaliana OX=3702 GN=At4g22110 PE=2 SV=1;	PF08240.13;PF00107.27	ADH_N;ADH_zinc_N	Alcohol dehydrogenase GroES-like domain;Zinc-binding dehydrogenase
gene.CpA0602901.1	14.3	5.02333	99.6233	0	0	0.396667	GO:001674	MF:transferase activity;	------	------	------	------	COG0607	P:Inorganic ion transport and metabolism	XP_004967296.1	thiosulfate sulfurtransferase 16, chloroplastic [Setaria italica]	sp|P27626|DIN1_RAPSA;	Senescence-associated protein DIN1 OS=Raphanus sativus OX=3726 GN=DIN1 PE=2 SV=1;	PF00581.21	Rhodanese	Rhodanese-like domain
gene.CpA0701715.1	4.69333	4.34333	13	0.023333	0.04	1.07333	GO:0016021;GO:000418	CC:integral component of membrane;MF:carboxypeptidase activity;	K01301	NAALAD	------	------	COG2234	S:Function unknown	XP_004969898.1	probable glutamate carboxypeptidase LAMP1 [Setaria italica]	sp|Q7Y228|LAMP1_ARATH;	Probable glutamate carboxypeptidase LAMP1 OS=Arabidopsis thaliana OX=3702 GN=LAMP1 PE=2 SV=1;	PF04389.18;PF02225.23;PF01546.29	Peptidase_M28;PA;Peptidase_M20	Peptidase family M28;PA domain;Peptidase family M20/M25/M40
gene.CpA0702963.1	14.8333	8.66667	44.8333	0.746667	0.433333	1.62667	GO:0046872;GO:0051213;GO:001649	MF:metal ion binding;MF:dioxygenase activity;MF:oxidoreductase activity;	------	------	------	------	COG3491	S:Function unknown	XP_034595080.1	S-norcoclaurine synthase 1-like [Setaria viridis]	sp|Q94LP4|ODD11_ORYSJ;	2-oxoglutarate-dependent dioxygenase 11 OS=Oryza sativa subsp. japonica OX=39947 GN=2ODD11 PE=1 SV=1;	PF14226.7;PF03171.21	DIOX_N;2OG-FeII_Oxy	non-haem dioxygenase in morphine synthesis N-terminal;2OG-F
gene.CpB0103652.1	20.5867	17.3433	95.0867	0	0.033333	0.166667	GO:0006979;GO:0042744;GO:0005576;GO:0020037;GO:0046872;GO:000460	BP:response to oxidative stress;BP:hydrogen peroxide catabolic process;CC:extracellular region;MF:heme binding;MF:metal ion binding;MF:peroxidase activity;	K00430	E1.11.1.7	map00940	Phenylpropanoid biosynthesis	ENOG410YEPY	S:Function unknown	XP_025808187.1	peroxidase 2-like [Panicum hallii]	sp|Q9LEH3|PER15_IPOBA;	Peroxidase 15 OS=Ipomoea batatas OX=4120 GN=pod PE=1 SV=1;	PF00141.24	peroxidase	Peroxidase
gene.CpB0103949.1	23.0767	19.6533	70.44	1.86667	0.616667	2.81667	GO:0045487;GO:0016021;GO:0004497;GO:0020037;GO:0016705;GO:000550	BP:gibberellin catabolic process;CC:integral component of membrane;MF:monooxygenase activity;MF:heme binding;MF:oxidoreductase activity, acting on paired donors, with incorporation or reduction of molecular oxygen;MF:iron ion binding;	K20663	CYP714D1	------	------	COG2124	S:Function unknown	XP_034583809.1	cytochrome P450 714D1-like [Setaria viridis]	sp|Q5KQH7|C14D1_ORYSJ;	Cytochrome P450 714D1 OS=Oryza sativa subsp. japonica OX=39947 GN=CYP714D1 PE=1 SV=1;	PF00067.23	p450	Cytochrome P450
gene.CpB0200948.1	75.3733	49.9433	1391.39	0.376667	0.34	1.10667	GO:0016021;GO:0005576;GO:0008233;GO:000486	CC:integral component of membrane;CC:extracellular region;MF:peptidase activity;MF:serine-type endopeptidase inhibitor activity;	------	------	------	------	ENOG41108I2	S:Function unknown	XP_004968056.1	Bowman-Birk type wound-induced proteinase inhibitor WIP1 [Setaria italica]	sp|P31862|IBBWP_MAIZE;	Bowman-Birk type wound-induced proteinase inhibitor WIP1 OS=Zea mays OX=4577 GN=WIP1 PE=2 SV=1;	------	------	------
gene.CpB0201301.1	32.9767	16.14	180.577	0.293333	0	0	GO:0045841;GO:000990	BP:negative regulation of mitotic metaphase/anaphase transition;BP:regulation of flower development;	------	------	------	------	ENOG4112CDX	S:Function unknown	XP_004967814.1	flowering-promoting factor 1-like protein 1 [Setaria italica]	sp|Q9LGE3|FLP1_ORYSJ;	Flowering-promoting factor 1-like protein 1 OS=Oryza sativa subsp. japonica OX=39947 GN=RAA1 PE=1 SV=1;	------	------	------
gene.CpB0203073.1	4.72667	2.83	12.8	0.05	0.02	0.063333	GO:0046872;GO:0051213;GO:001649	MF:metal ion binding;MF:dioxygenase activity;MF:oxidoreductase activity;	------	------	------	------	COG3491	S:Function unknown	XP_004968890.1	1-aminocyclopropane-1-carboxylate oxidase homolog 6 [Setaria italica]	sp|Q84TC2|BX6_MAIZE;	DIBOA-glucoside dioxygenase BX6 OS=Zea mays OX=4577 GN=BX6 PE=1 SV=1;	PF03171.21;PF14226.7	2OG-FeII_Oxy;DIOX_N	2OG-F;non-haem dioxygenase in morphine synthesis N-terminal
gene.CpB0204002.1	7.44333	9.62667	156.533	0	0.083333	0.163333	GO:001602	CC:integral component of membrane;	------	------	------	------	ENOG410YG9F	S:Function unknown	OEL36103.1	hypothetical protein BAE44_0002878 [Dichanthelium oligosanthes]	sp|Q6L4D2|PM19L_ORYSJ;	Membrane protein PM19L OS=Oryza sativa subsp. japonica OX=39947 GN=PM19L PE=2 SV=1;	PF05512.12	AWPM-19	AWPM-19-like family
gene.CpB0205103.1	13.3167	9.36667	39.94	1.56	0.763333	1.19	------	------	------	------	------	------	ENOG410XRSQ	S:Function unknown	XP_004970742.1	patellin-3 [Setaria italica]	sp|Q9M0R2|PATL5_ARATH;	Patellin-5 OS=Arabidopsis thaliana OX=3702 GN=PATL5 PE=1 SV=2;	PF00650.21;PF03765.16	CRAL_TRIO;CRAL_TRIO_N	CRAL/TRIO domain;CRAL/TRIO, N-terminal domain
gene.CpB0205632.1	15.3233	10.2033	73.31	0.096667	0.233333	0.89	GO:0005975;GO:0006952;GO:0005737;GO:0046658;GO:0004553;GO:004297	BP:carbohydrate metabolic process;BP:defense response;CC:cytoplasm;CC:anchored component of plasma membrane;MF:hydrolase activity, hydrolyzing O-glycosyl compounds;MF:glucan endo-1,3-beta-D-glucosidase activity;	------	------	------	------	ENOG410YARB	S:Function unknown	XP_012701549.1	glucan endo-1,3-beta-glucosidase GV [Setaria italica]	sp|Q02438|E13E_HORVU;	Glucan endo-1,3-beta-glucosidase GV OS=Hordeum vulgare OX=4513 PE=2 SV=2;	PF00332.19	Glyco_hydro_17	Glycosyl hydrolases family 17
gene.CpB0302678.1	2.12	1.99	9.36667	0.093333	0.11	0.49	GO:0006468;GO:0048544;GO:0016021;GO:0005886;GO:0030246;GO:0004674;GO:000552	BP:protein phosphorylation;BP:recognition of pollen;CC:integral component of membrane;CC:plasma membrane;MF:carbohydrate binding;MF:protein serine/threonine kinase activity;MF:ATP binding;	------	------	------	------	COG0515	T:Signal transduction mechanisms	TKW35217.1	hypothetical protein SEVIR_2G358000v2 [Setaria viridis]	sp|O81905|SD18_ARATH;	Receptor-like serine/threonine-protein kinase SD1-8 OS=Arabidopsis thaliana OX=3702 GN=SD18 PE=1 SV=1;	PF01453.25;PF00954.21;PF08276.12	B_lectin;S_locus_glycop;PAN_2	D-mannose binding lectin;S-locus glycoprotein domain;PAN-like domain
gene.CpB0403386.1	31.3	12.6167	84.1867	0.066667	0	0.506667	GO:0016021;GO:002285	CC:integral component of membrane;MF:transmembrane transporter activity;	------	------	------	------	ENOG410XNQK	T:Signal transduction mechanisms	XP_004983249.1	probable polyol transporter 6 [Setaria italica]	sp|Q9XIH6|PLT2_ARATH;	Putative polyol transporter 2 OS=Arabidopsis thaliana OX=3702 GN=PLT2 PE=3 SV=1;	PF00083.25;PF07690.17	Sugar_tr;MFS_1	Sugar;Major Facilitator Superfamily
gene.CpB0500467.1	26.3233	6.55333	132.533	0.283333	0.05	0.813333	GO:0006817;GO:0016021;GO:0005315;GO:001529	BP:phosphate ion transport;CC:integral component of membrane;MF:inorganic phosphate transmembrane transporter activity;MF:symporter activity;	K08176	PHO84	------	------	ENOG410ZVN7	G:Carbohydrate transport and metabolism	XP_034571878.1	inorganic phosphate transporter 1-2-like [Setaria viridis]	sp|Q8GSD9|PHT12_ORYSJ;	Inorganic phosphate transporter 1-2 OS=Oryza sativa subsp. japonica OX=39947 GN=PTH1-2 PE=2 SV=1;	PF00083.25;PF07690.17	Sugar_tr;MFS_1	Sugar;Major Facilitator Superfamily
gene.CpB0501643.1	7.39667	7.45333	37.2	0.073333	0.036667	0.286667	GO:0009738;GO:0006952;GO:0080163;GO:0009607;GO:0005737;GO:0005634;GO:0038023;GO:0004864;GO:001042	BP:abscisic acid-activated signaling pathway;BP:defense response;BP:regulation of protein serine/threonine phosphatase activity;BP:response to biotic stimulus;CC:cytoplasm;CC:nucleus;MF:signaling receptor activity;MF:protein phosphatase inhibitor activity;MF:abscisic acid binding;	------	------	------	------	ENOG410YZ38	S:Function unknown	CAB3496182.1	unnamed protein product [Digitaria exilis]	sp|Q05736|PR1_ASPOF;	Pathogenesis-related protein 1 OS=Asparagus officinalis OX=4686 GN=PR1 PE=2 SV=1;	PF00407.20	Bet_v_1	Pathogenesis-related protein Bet v 1 family
gene.CpB0501645.1	43.8967	28.5333	227.557	0.426667	0.026667	1.29333	GO:0009738;GO:0006952;GO:0080163;GO:0009607;GO:0005737;GO:0005634;GO:0038023;GO:0004864;GO:001042	BP:abscisic acid-activated signaling pathway;BP:defense response;BP:regulation of protein serine/threonine phosphatase activity;BP:response to biotic stimulus;CC:cytoplasm;CC:nucleus;MF:signaling receptor activity;MF:protein phosphatase inhibitor activity;MF:abscisic acid binding;	------	------	------	------	ENOG410YZ38	S:Function unknown	CAB3496182.1	unnamed protein product [Digitaria exilis]	sp|Q05736|PR1_ASPOF;	Pathogenesis-related protein 1 OS=Asparagus officinalis OX=4686 GN=PR1 PE=2 SV=1;	------	------	------
gene.CpB0601401.1	4.69	6.67333	24.1567	0.036667	0	0.026667	GO:0016021;GO:0005506;GO:0016705;GO:0004497;GO:002003	CC:integral component of membrane;MF:iron ion binding;MF:oxidoreductase activity, acting on paired donors, with incorporation or reduction of molecular oxygen;MF:monooxygenase activity;MF:heme binding;	------	------	------	------	COG2124	Q:Secondary metabolites biosynthesis, transport and catabolism	XP_022679405.1	LOW QUALITY PROTEIN: geraniol 8-hydroxylase [Setaria italica]	sp|Q6Z5I7|C76M6_ORYSJ;	Oryzalexin E synthase OS=Oryza sativa subsp. japonica OX=39947 GN=CYP76M6 PE=1 SV=1;	PF00067.23	p450	Cytochrome P450

## Sheet: turquoise
Gene_id	RSL	RD	RCK	LSL	LD	LCK	GO_id	GO_term	KO_id	KO_name	Pathway_id	Pathway_definition	COG_id	COG_Functional Categories	NR_hit-name	NR_description	Swiss-Prot_hit-name	Swiss-Prot_description	Pfam_id	Domain	Domain description
gene.CpA0102148.1	13.8567	16.68	2.38667	0.64	0.733333	0.346667	GO:0046983;GO:000367	MF:protein dimerization activity;MF:DNA binding;	------	------	------	------	ENOG4110674;ENOG41106U0	S:Function unknown;	XP_004973505.2	transcription factor bHLH30 [Setaria italica]	sp|Q9S7Y1|BH030_ARATH;	Transcription factor bHLH30 OS=Arabidopsis thaliana OX=3702 GN=BHLH30 PE=1 SV=1;	PF00010.27	HLH	Helix-loop-helix DNA-binding domain
gene.CpA0103469.1	80.2333	64.1533	21.6	7.77	4.52667	1.87333	GO:0005975;GO:0046168;GO:0006116;GO:0006072;GO:0009331;GO:0005829;GO:0004367;GO:005128	BP:carbohydrate metabolic process;BP:glycerol-3-phosphate catabolic process;BP:NADH oxidation;BP:glycerol-3-phosphate metabolic process;CC:glycerol-3-phosphate dehydrogenase complex;CC:cytosol;MF:glycerol-3-phosphate dehydrogenase [NAD+] activity;MF:NAD binding;	K00006	GPD1	map00564	Glycerophospholipid metabolism	COG0240	C:Energy production and conversion	XP_004961637.1	probable glycerol-3-phosphate dehydrogenase [NAD(+)] 3, cytosolic [Setaria italica]	sp|Q8S2G5|GPDH2_ORYSJ;	Probable glycerol-3-phosphate dehydrogenase [NA;	PF07479.15;PF01210.24	NAD_Gly3P_dh_C;NAD_Gly3P_dh_N	NAD-dependent glycerol-3-phosphate dehydrogenase C-terminus;NAD-dependent glycerol-3-phosphate dehydrogenase N-terminus
gene.CpA0104281.1	23.88	24.9633	5.35333	0.443333	0.463333	0.2	GO:001630	MF:kinase activity;	------	------	------	------	ENOG410Y973;ENOG411157W	S:Function unknown;	XP_034587523.1	leucine-rich repeat extensin-like protein 4 [Setaria viridis]	sp|O48809|LRX2_ARATH;	Leucine-rich repeat extensin-like protein 2 OS=Arabidopsis thaliana OX=3702 GN=LRX2 PE=1 SV=1;	PF13855.7;PF12799.8	LRR_8;LRR_4	Leucine rich repeat;Leucine Rich repeats
gene.CpA0104885.1	62.81	88.7367	10.0167	1.73333	2.15333	0.196667	GO:0046872;GO:0051213;GO:001649	MF:metal ion binding;MF:dioxygenase activity;MF:oxidoreductase activity;	K04125	E1.14.11.13	map00904	Diterpenoid biosynthesis	COG3491	S:Function unknown	XP_034585492.1	gibberellin 2-beta-dioxygenase 3-like isoform X1 [Setaria viridis]	sp|Q9SQ80|G2OX1_PEA;	Gibberellin 2-beta-dioxygenase 1 OS=Pisum sativum OX=3888 GN=GA2OX1 PE=1 SV=1;	PF03171.21;PF14226.7	2OG-FeII_Oxy;DIOX_N	2OG-F;non-haem dioxygenase in morphine synthesis N-terminal
gene.CpA0200714.1	103.067	81.2167	29.35	10.9467	8.35333	5.47667	GO:0051252;GO:0005634;GO:1990904;GO:000372	BP:regulation of RNA metabolic process;CC:nucleus;CC:ribonucleoprotein complex;MF:RNA binding;	K14411	MSI	map03015	mRNA surveillance pathway	ENOG410YA8Z	S:Function unknown	RCV13740.1	hypothetical protein SETIT_2G370100v2 [Setaria italica]	sp|Q8W034|RNP1_ARATH;	Heterogeneous nuclear ribonucleoprotein 1 OS=Arabidopsis thaliana OX=3702 GN=RNP1 PE=1 SV=1;	PF00076.23;PF16367.6;PF14605.7	RRM_1;RRM_7;Nup35_RRM_2	RNA recognition motif.;RNA recognition motif;Nup53/35/40-type RNA recognition motif
gene.CpA0200899.1	13.75	21.32	3.33	0.71	0.12	0.11	------	------	------	------	------	------	COG5429	S:Function unknown	XP_004958017.1	uncharacterized protein LOC101785046 [Setaria italica]	------	------	PF06764.12	DUF1223	Protein of unknown function
gene.CpA0203396.1	40.4167	29.79	7.08	1.63	0.236667	0.026667	------	------	------	------	------	------	ENOG4111GT4;ENOG410ZQ5M	S:Function unknown;	XP_004955841.1	protein LURP-one-related 15 [Setaria italica]	sp|Q9LZX1|LOR15_ARATH;	Protein LURP-one-related 15 OS=Arabidopsis thaliana OX=3702 GN=At5g01750 PE=1 SV=1;	PF04525.13	LOR	LURP-one-related
gene.CpA0300754.1	18.7633	18.59	6.94	2.91667	0.886667	0.3	GO:0015031;GO:0006887;GO:0016021;GO:000014	BP:protein transport;BP:exocytosis;CC:integral component of membrane;CC:exocyst;	K07195	EXOC7, EXO70	------	------	ENOG410YIGI	S:Function unknown	XP_022685137.1	exocyst complex component EXO70A1 [Setaria italica]	sp|Q9LZD3|E70A1_ARATH;	Exocyst complex component EXO70A1 OS=Arabidopsis thaliana OX=3702 GN=EXO70A1 PE=1 SV=1;	PF03081.16	Exo70	Exo70 exocyst complex subunit
gene.CpA0301239.1	9.57333	8.95	2.39	0.513333	0.526667	0.133333	GO:0031011;GO:000367	CC:Ino80 complex;MF:DNA binding;	------	------	------	------	ENOG410ZINE	S:Function unknown	XP_004973822.1	uncharacterized protein LOC101759242 [Setaria italica]	------	------	------	------	------
gene.CpA0302196.1	116.287	75.2667	17.6467	7.65	4.2	2.86333	GO:001602	CC:integral component of membrane;	------	------	------	------	ENOG411063K	S:Function unknown	TKW08455.1	hypothetical protein SEVIR_6G028600v2 [Setaria viridis]	------	------	------	------	------
gene.CpA0404657.1	42.3067	40.8867	7.70667	3.43667	2.96	0.776667	------	------	------	------	------	------	ENOG4111KEM	S:Function unknown	XP_004981952.1	uncharacterized protein LOC101772813 [Setaria italica]	------	------	PF06101.12	Vps62	Vacuolar protein sorting-associated protein 62
gene.CpA0500371.1	47.8	66.7333	10.72	2.80333	2.62	1.43667	GO:0010417;GO:0005975;GO:0071555;GO:0009834;GO:0000139;GO:0042285;GO:001501	BP:glucuronoxylan biosynthetic process;BP:carbohydrate metabolic process;BP:cell wall organization;BP:plant-type secondary cell wall biogenesis;CC:Golgi membrane;MF:xylosyltransferase activity;MF:galactosylgalactosylxylosylprotein 3-beta-glucuronosyltransferase activity;	K20871	IRX14	------	------	ENOG410XP79	S:Function unknown	XP_004977050.1	probable glucuronosyltransferase Os04g0650300 [Setaria italica]	sp|B9FCV3|GT43_ORYSJ;	Probable glucuronosyltransferase Os04g0650300 OS=Oryza sativa subsp. japonica OX=39947 GN=Os04g0650300 PE=3 SV=1;	PF03360.17	Glyco_transf_43	Glycosyltransferase family 43
gene.CpA0501181.1	28.7933	29.1233	4.09	1.4	0.723333	0.236667	GO:0004674;GO:0005524;GO:000467	MF:protein serine/threonine kinase activity;MF:ATP binding;MF:protein kinase activity;	------	------	------	------	COG0515	T:Signal transduction mechanisms	XP_034601989.1	probable serine/threonine-protein kinase PIX13 [Setaria viridis]	sp|Q9SII6|PIX13_ARATH;	Probable serine/threonine-protein kinase PIX13 OS=Arabidopsis thaliana OX=3702 GN=PIX13 PE=1 SV=2;	PF07714.18;PF00069.26	PK_Tyr_Ser-Thr;Pkinase	Protein tyrosine and serine/threonine kinase;Protein kinase domain
gene.CpA0504528.1	16.27	16.15	6.43333	0.99	0.553333	0.113333	GO:0005737;GO:0005634;GO:000484	CC:cytoplasm;CC:nucleus;MF:ubiquitin-protein transferase activity;	------	------	------	------	ENOG410YBA5	O:Posttranslational modification, protein turnover, chaperones	XP_034572334.1	U-box domain-containing protein 11-like [Setaria viridis]	sp|Q9C9A6|PUB10_ARATH;	U-box domain-containing protein 10 OS=Arabidopsis thaliana OX=3702 GN=PUB10 PE=2 SV=1;	PF00514.24;PF04564.16	Arm;U-box	Armadillo/beta-catenin-like repeat;U-box domain
gene.CpA0600807.1	63.7033	61.93	18.48	6.5	4.87333	1.13333	GO:000588	CC:plasma membrane;	K18211	SNAP25	------	------	ENOG410Y3Y0	U:Intracellular trafficking, secretion, and vesicular transport	XP_034575862.1	SNAP25 homologous protein SNAP33-like [Setaria viridis]	sp|Q9S7P9|SNP33_ARATH;	SNAP25 homologous protein SNAP33 OS=Arabidopsis thaliana OX=3702 GN=SNAP33 PE=1 SV=1;	------	------	------
gene.CpA0601002.1	39.1867	39.3433	5.18333	1.96667	1.51333	1.36	GO:0033314;GO:0006282;GO:0006281;GO:0000077;GO:0031347;GO:0000790;GO:0042025;GO:000368	BP:mitotic DNA replication checkpoint;BP:regulation of DNA repair;BP:DNA repair;BP:DNA damage checkpoint;BP:regulation of defense response;CC:nuclear chromatin;CC:host cell nucleus;MF:chromatin binding;	K06662	HRAD17, RAD24	------	------	COG0470	S:Function unknown	XP_034572978.1	cell cycle checkpoint protein RAD17 isoform X1 [Setaria viridis]	sp|Q9MBA3|RAD17_ARATH;	Cell cycle checkpoint protein RAD17 OS=Arabidopsis thaliana OX=3702 GN=RAD17 PE=1 SV=1;	PF03215.16;PF00004.30	Rad17;AAA	Rad17 P-loop domain;ATPase family associated with various cellular activities
gene.CpA0700804.1	32.4367	32.2233	13.6433	4.03667	2.01333	1.13667	GO:0046854;GO:0010008;GO:0000285;GO:0016307;GO:000552	BP:phosphatidylinositol phosphorylation;CC:endosome membrane;MF:1-phosphatidylinositol-3-phosphate 5-kinase activity;MF:phosphatidylinositol phosphate kinase activity;MF:ATP binding;	K00921	PIKFYVE, FAB1	map04145;map04070;map00562	Phagosome;Phosphatidylinositol signaling system;Inositol phosphate metabolism	COG0459	G:Carbohydrate transport and metabolism	XP_004970745.1	putative 1-phosphatidylinositol-3-phosphate 5-kinase FAB1C [Setaria italica]	sp|Q0WUR5|FAB1A_ARATH;	1-phosphatidylinositol-3-phosphate 5-kinase FAB1A OS=Arabidopsis thaliana OX=3702 GN=FAB1A PE=2 SV=1;	PF01504.19;PF00118.25	PIP5K;Cpn60_TCP1	Phosphatidylinositol-4-phosphate 5-Kinase;TCP-1/cpn60 chaperonin family
gene.CpA0700873.1	75.8467	112.76	18.52	5.54	2.53	1.03333	GO:0005634;GO:0000786;GO:0016021;GO:0046982;GO:000367	CC:nucleus;CC:nucleosome;CC:integral component of membrane;MF:protein heterodimerization activity;MF:DNA binding;	K11253	H3	------	------	------	------	EOY31042.1	Histone superfamily protein [Theobroma cacao]	sp|P59226|H32_ARATH;	Histone H3.2 OS=Arabidopsis thaliana OX=3702 GN=HTR2 PE=1 SV=2;	PF00125.25;PF15630.7;PF15511.7	Histone;CENP-S;CENP-T_C	Core histone H2A/H2B/H3/H4;CENP-S protein;Centromere kinetochore component CENP-T histone fold
gene.CpB0104160.1	29.62	34.1633	8.86333	1.33667	1.31667	0.146667	GO:0071555;GO:0005794;GO:0016021;GO:0000139;GO:0016740;GO:001675	BP:cell wall organization;CC:Golgi apparatus;CC:integral component of membrane;CC:Golgi membrane;MF:transferase activity;MF:transferase activity, transferring glycosyl groups;	------	------	------	------	COG1215	U:Intracellular trafficking, secretion, and vesicular transport	CAB3461005.1	unnamed protein product [Digitaria exilis]	sp|Q6L538|CSLC7_ORYSJ;	Probable xyloglucan glycosyltransferase 7 OS=Oryza sativa subsp. japonica OX=39947 GN=CSLC7 PE=2 SV=1;	PF13641.7;PF13632.7;PF00535.27;PF13506.7	Glyco_tranf_2_3;Glyco_trans_2_3;Glycos_transf_2;Glyco_transf_21	Glycosyltransferase like family 2;Glycosyl transferase family group 2;Glycosyl transferase family 2;Glycosyl transferase family 21
gene.CpB0204000.1	53.2367	50.2	10.83	1.95667	0.563333	0.486667	GO:0007346;GO:0032147;GO:0031098;GO:0023014;GO:0005737;GO:0004674;GO:0005524;GO:000467	BP:regulation of mitotic cell cycle;BP:activation of protein kinase activity;BP:stress-activated protein kinase signaling cascade;BP:signal transduction by protein phosphorylation;CC:cytoplasm;MF:protein serine/threonine kinase activity;MF:ATP binding;MF:protein kinase activity;	K20716	MAPKKK17_18	map04016	MAPK signaling pathway - plant	ENOG410XQGS	T:Signal transduction mechanisms	XP_034594717.1	mitogen-activated protein kinase kinase kinase 18-like [Setaria viridis]	sp|O80888|M3K17_ARATH;	Mitogen-activated protein kinase kinase kinase 17 OS=Arabidopsis thaliana OX=3702 GN=MAPKKK17 PE=1 SV=1;	PF00069.26;PF07714.18	Pkinase;PK_Tyr_Ser-Thr	Protein kinase domain;Protein tyrosine and serine/threonine kinase
gene.CpB0302980.1	87.2567	55.4333	14.27	7.74667	3.23333	3.45	GO:0051252;GO:0005634;GO:1990904;GO:000372	BP:regulation of RNA metabolic process;CC:nucleus;CC:ribonucleoprotein complex;MF:RNA binding;	K14411	MSI	map03015	mRNA surveillance pathway	ENOG410YA8Z	S:Function unknown	RCV13740.1	hypothetical protein SETIT_2G370100v2 [Setaria italica]	sp|Q8W034|RNP1_ARATH;	Heterogeneous nuclear ribonucleoprotein 1 OS=Arabidopsis thaliana OX=3702 GN=RNP1 PE=1 SV=1;	PF00076.23;PF16367.6;PF14605.7	RRM_1;RRM_7;Nup35_RRM_2	RNA recognition motif.;RNA recognition motif;Nup53/35/40-type RNA recognition motif
gene.CpB0401109.1	32.27	26.4833	10.19	3.89667	1.95667	0.87	------	------	------	------	------	------	ENOG4111KEM	S:Function unknown	XP_004981952.1	uncharacterized protein LOC101772813 [Setaria italica]	------	------	PF06101.12	Vps62	Vacuolar protein sorting-associated protein 62
gene.CpB0501130.1	66.3167	57.6067	19.8533	10.9333	9.94	5.06333	GO:0047484;GO:0052746;GO:0032957;GO:0005737;GO:0016021;GO:0047325;GO:0000287;GO:0005524;GO:0052725;GO:005272	BP:regulation of response to osmotic stress;BP:inositol phosphorylation;BP:inositol trisphosphate metabolic process;CC:cytoplasm;CC:integral component of membrane;MF:inositol tetrakisphosphate 1-kinase activity;MF:magnesium ion binding;MF:ATP binding;MF:inositol-1,3,4-trisphosphate 6-kinase activity;MF:inositol-1,3,4-trisphosphate 5-kinase activity;	K00913	ITPK1	map04070;map00562	Phosphatidylinositol signaling system;Inositol phosphate metabolism	ENOG4110KIK	G:Carbohydrate transport and metabolism	XP_004985117.1	inositol-tetrakisphosphate 1-kinase 2 [Setaria italica]	sp|B8AJL9|ITPK2_ORYSI;	Inositol-tetrakisphosphate 1-kinase 2 OS=Oryza sativa subsp. indica OX=39946 GN=ITPK2 PE=3 SV=1;	PF05770.12;PF17927.2	Ins134_P3_kin;Ins134_P3_kin_N	Inositol 1,3,4-trisphosphate 5/6-kinase ATP-grasp domain;Inositol 1,3,4-trisphosphate 5/6-kinase pre-ATP-grasp domain
gene.CpB0501328.1	42.1433	42.3	12.5733	8.54333	8.41333	5.39	GO:0055037;GO:001711	CC:recycling endosome;MF:Rab guanyl-nucleotide exchange factor activity;	------	------	------	------	ENOG410XP3F	S:Function unknown	XP_004984948.1	protein DENND6B [Setaria italica]	sp|Q8IWF6|DEN6A_HUMAN;	Protein DENND6A OS=Homo sapiens OX=9606 GN=DENND6A PE=1 SV=1;	PF08616.11	SPA	Stabilization of polarity axis
gene.CpB0601120.1	33.5433	46.6233	3.84333	2.58667	1.2	0.533333	GO:001602	CC:integral component of membrane;	------	------	------	------	ENOG41100BI	S:Function unknown	XP_004951361.1	uncharacterized protein LOC101764086 [Setaria italica]	------	------	PF01436.22	NHL	NHL repeat
gene.CpB0602313.1	876.153	605.267	136.35	45.43	17.25	25.1067	GO:0009631;GO:0009737;GO:0009414;GO:0009415;GO:0005829;GO:001602	BP:cold acclimation;BP:response to abscisic acid;BP:response to water deprivation;BP:response to water;CC:cytosol;CC:membrane;	------	------	------	------	ENOG410ZBHP	S:Function unknown	XP_004953407.1	dehydrin COR410 [Setaria italica]	sp|Q6ESR4|DHN1_ORYSJ;	Dehydrin DHN1 OS=Oryza sativa subsp. japonica OX=39947 GN=DHN1 PE=2 SV=1;	PF00257.20	Dehydrin	Dehydrin
gene.CpB0602761.1	20.0667	22.3967	7.45	0.883333	0.65	0.036667	GO:0005737;GO:0005634;GO:000484	CC:cytoplasm;CC:nucleus;MF:ubiquitin-protein transferase activity;	------	------	------	------	ENOG410YBA5	O:Posttranslational modification, protein turnover, chaperones	XP_034572334.1	U-box domain-containing protein 11-like [Setaria viridis]	sp|Q8GUG9|PUB11_ARATH;	U-box domain-containing protein 11 OS=Arabidopsis thaliana OX=3702 GN=PUB11 PE=2 SV=2;	PF00514.24;PF04564.16;PF13646.7	Arm;U-box;HEAT_2	Armadillo/beta-catenin-like repeat;U-box domain;HEAT repeats
gene.CpB0602863.1	258.657	347.847	42.2333	16.49	9.69333	8.18	GO:0015840;GO:0016021;GO:001526	BP:urea transport;CC:integral component of membrane;MF:channel activity;	K09874	NIP	------	------	COG0580	S:Function unknown	XP_004953867.1	aquaporin NIP2-1 [Setaria italica]	sp|Q19KC1|NIP21_MAIZE;	Aquaporin NIP2-1 OS=Zea mays OX=4577 GN=NIP2-1 PE=2 SV=2;	PF00230.21	MIP	Major intrinsic protein
gene.CpB0602919.1	79.97	73.66	21.08	9.28333	3.89333	5.53	GO:0005737;GO:0005544;GO:000550	CC:cytoplasm;MF:calcium-dependent phospholipid binding;MF:calcium ion binding;	K17098	ANNAT	------	------	ENOG410XPUN	S:Function unknown	XP_025799029.1	annexin D7-like [Panicum hallii]	sp|Q9LX07|ANXD7_ARATH;	Annexin D7 OS=Arabidopsis thaliana OX=3702 GN=ANNAT7 PE=2 SV=1;	PF00191.21	Annexin	Annexin
gene.CpB0701334.1	74.42	81.5567	12.4033	3.15	1.98333	0.44	GO:0004674;GO:0005524;GO:000467	MF:protein serine/threonine kinase activity;MF:ATP binding;MF:protein kinase activity;	------	------	------	------	COG0515	T:Signal transduction mechanisms	XP_004976505.1	probable serine/threonine-protein kinase PIX13 [Setaria italica]	sp|Q9SII6|PIX13_ARATH;	Probable serine/threonine-protein kinase PIX13 OS=Arabidopsis thaliana OX=3702 GN=PIX13 PE=1 SV=2;	PF00069.26;PF07714.18	Pkinase;PK_Tyr_Ser-Thr	Protein kinase domain;Protein tyrosine and serine/threonine kinase

## Sheet: magenta
Gene_id	R_SL	R_D	R_CK	L_SL	L_D	L_CK	GO_id	GO_term	KO_id	KO_name	Pathway_id	Pathway_definition	COG_id	COG_Functional Categories	NR_hit-name	NR_description	Swiss-Prot_hit-name	Swiss-Prot_description	Pfam_id	Domain	Domain description
gene.Cp0000564.1	0.01	0.03	0.27	1.42	1.49	8.78333	GO:0006952;GO:0002229;GO:0042742;GO:0016021;GO:0005886;GO:0004672;GO:0030246;GO:0004675;GO:0004190;GO:0004713;GO:000552	BP:defense response;BP:defense response to oomycetes;BP:defense response to bacterium;CC:integral component of membrane;CC:plasma membrane;MF:protein kinase activity;MF:carbohydrate binding;MF:transmembrane receptor protein serine/threonine kinase activity;MF:aspartic-type endopeptidase activity;MF:protein tyrosine kinase activity;MF:ATP binding;	------	------	------	------	ENOG410Y1RK	S:Function unknown	XP_004975217.1	L-type lectin-domain containing receptor kinase IX.1 [Setaria italica]	sp|Q9LXA5|LRK91_ARATH;	L-type lectin-domain containing receptor kinase IX.1 OS=Arabidopsis thaliana OX=3702 GN=LECRK91 PE=1 SV=1;	PF00139.20;PF07714.18;PF00069.26	Lectin_legB;PK_Tyr_Ser-Thr;Pkinase	Legume lectin domain;Protein tyrosine and serine/threonine kinase;Protein kinase domain
gene.CpA0100763.1	0.04	0.206667	0.85	5.98333	6.39333	71.3667	GO:0005524;GO:0043531;GO:000467	MF:ATP binding;MF:ADP binding;MF:protein kinase activity;	------	------	------	------	COG4886	K:Transcription	TVU23467.1	hypothetical protein EJB05_25836, partial [Eragrostis curvula]	sp|F7J0N2|RGA5R_ORYSJ;	Disease resistance protein RGA5 OS=Oryza sativa subsp. japonica OX=39947 GN=RGA5 PE=1 SV=1;	PF00069.26;PF07714.18;PF00931.23;PF18052.2;PF13191.7;PF13401.7	Pkinase;PK_Tyr_Ser-Thr;NB-ARC;Rx_N;AAA_16;AAA_22	Protein kinase domain;Protein tyrosine and serine/threonine kinase;NB-ARC domain;Rx N-terminal domain;AAA ATPase domain;AAA domain
gene.CpA0100792.1	0.023333	0	0.033333	23.59	15.34	204.003	------	------	------	------	------	------	ENOG4111S54	S:Function unknown	XP_004979792.1	uncharacterized protein LOC101756585 [Setaria italica]	------	------	PF03080.16;PF14365.7	Neprosin;Neprosin_AP	Neprosin;Neprosin activation peptide
gene.CpA0103247.1	4.68	4.80333	8.09	20.13	10.4633	92.2567	GO:0005829;GO:0008106;GO:0016491;GO:000403	CC:cytosol;MF:alcohol dehydrogenas;MF:oxidoreductase activity;MF:aldito;	K00002	AKR1A1, adh	map00010;map00040;map00561	Glycolysis / Gluconeogenesis;Pentose and glucuronate interconversions;Glycerolipid metabolism	COG0656	S:Function unknown	XP_004961878.1	aldo-keto reductase family 4 member C10 isoform X1 [Setaria italica]	sp|Q84TF0|AKRCA_ARATH;	Aldo-keto reductase family 4 member C10 OS=Arabidopsis thaliana OX=3702 GN=AKR4C10 PE=1 SV=1;	PF00248.22	Aldo_ket_red	Aldo/keto reductase family
gene.CpA0104960.1	0.06	0.133333	0.383333	2.87333	3.45	13.5733	GO:0009941;GO:0003824;GO:0016787;GO:001674	CC:chloroplast envelope;MF:catalytic activity;MF:hydrolase activity;MF:transferase activity;	------	------	------	------	ENOG410XP2C	S:Function unknown	XP_034585498.1	2-hydroxy-6-oxo-6-phenylhexa-2,4-dienoate hydrolase [Setaria viridis]	sp|Q59324|BPHD_COMTE;	2-hydroxy-6-oxo-6-phenylhexa-2,4-dienoate hydrolase OS=Comamonas testosteroni OX=285 GN=bphD PE=3 SV=1;	PF12697.8;PF00561.21;PF12146.9;PF06821.14;PF08386.11	Abhydrolase_6;Abhydrolase_1;Hydrolase_4;Ser_hydrolase;Abhydrolase_4	Alpha/beta hydrolase family;alpha/beta hydrolase fold;Serine aminopeptidase, S33;Serine hydrolase;TAP-like protein
gene.CpA0203446.1	0	0	0.046667	5.51333	1.58	63.2967	GO:001682	MF:lyase activity;	------	------	------	------	COG0800	G:Carbohydrate transport and metabolism	XP_004955816.1	uncharacterized protein LOC101767516 [Setaria italica]	sp|P50846|ALKH_BACSU;	KHG/KDPG aldolase OS=Bacillus subtilis;	PF01081.20	Aldolase	KDPG and KHG aldolase
gene.CpA0204318.1	0	0.25	0.243333	1.38667	1.78333	6.36	------	------	------	------	------	------	ENOG41107EX	S:Function unknown	RLN33052.1	uncharacterized protein C2845_PM03G21150 [Panicum miliaceum]	sp|Q8L471|FLZ8_ARATH;	FCS-Like Zinc finger 8 OS=Arabidopsis thaliana OX=3702 GN=FLZ8 PE=1 SV=1;	------	------	------
gene.CpA0301341.1	0.12	0.113333	0.286667	7.59333	9.39	45.4933	GO:0098656;GO:0016021;GO:002285	BP:anion transmembrane transport;CC:integral component of membrane;MF:transmembrane transporter activity;	K14445	SLC13A2_3_5	------	------	COG0471	S:Function unknown	XP_034600245.1	tonoplast dicarboxylate transporter-like [Setaria viridis]	sp|Q8LG88|TDT_ARATH;	Tonoplast dicarboxylate transporter OS=Arabidopsis thaliana OX=3702 GN=TDT PE=2 SV=2;	PF00939.20;PF03600.17	Na_sulph_symp;CitMHS	Sodiu;Citrate transporter
gene.CpA0302238.1	0	0.216667	0.47	1.81333	4.33667	46.0667	GO:0016021;GO:001521	CC:integral component of membrane;MF:purine nucleoside transmembrane transporter activity;	------	------	------	------	ENOG41103MW	S:Function unknown	RLN04943.1	putative purine permease 11 [Panicum miliaceum]	sp|Q9LPF6|PUP11_ARATH;	Probable purine permease 11 OS=Arabidopsis thaliana OX=3702 GN=PUP11 PE=1 SV=1;	PF16913.6	PUNUT	Purine nucleobase transmembrane transport
gene.CpA0303946.1	0.94	3.77	3.70667	37.13	16.4867	218.233	GO:000370	MF:transcription factor activity, sequence-specific DNA binding;	------	------	------	------	ENOG410YRZY	S:Function unknown	TKW29470.1	hypothetical protein SEVIR_3G396500v2 [Setaria viridis]	sp|Q99090|CPRF2_PETCR;	Light-inducible protein CPRF2 OS=Petroselinum crispum OX=4043 GN=CPRF2 PE=2 SV=2;	PF12498.9;PF00170.22;PF07716.16;PF03131.18;PF11559.9	bZIP_C;bZIP_1;bZIP_2;bZIP_Maf;ADIP	Basic leucine-zipper C terminal;bZIP transcription factor;Basic region leucine zipper;bZIP Maf transcription factor;Afadin- and alpha -actinin-Binding
gene.CpA0405871.1	0	0	0	9.03333	27.5267	204.087	GO:0044238;GO:0045900;GO:0005840;GO:0022627;GO:0043022;GO:004302	BP:primary metabolic process;BP:negative regulation of translational elongation;CC:ribosome;CC:cytosolic small ribosomal subunit;MF:ribosome binding;MF:ribosomal small subunit binding;	------	------	------	------	COG1544	J:Translation, ribosomal structure and biogenesis	XP_034574062.1	ribosome-binding factor PSRP1, chloroplastic [Setaria viridis]	sp|P19954|PRSP1_SPIOL;	Ribosome-binding factor PSRP1, chloroplastic OS=Spinacia oleracea OX=3562 GN=PSRP1 PE=1 SV=2;	PF16321.6;PF02482.20	Ribosom_S30AE_C;Ribosomal_S30AE	Sigma 54 modulation/S30EA ribosomal protein C terminus;Sigma 54 modulation protein / S30EA ribosomal protein
gene.CpA0505187.1	0.786667	1.12333	13.1667	56.79	50.2467	1881.55	------	------	------	------	------	------	ENOG410XUIV	S:Function unknown	XP_034577895.1	uncharacterized protein YtoI-like [Setaria viridis]	sp|Q9HQU4|IMDH_HALSA;	Inosine-5'-monophosphate dehydrogenase OS=Halobacterium salinarum;	PF00571.29	CBS	CBS domain
gene.CpA0600110.1	0.046667	0.296667	1.11667	3.22667	2.25667	9.37667	GO:0009507;GO:0016301;GO:010219	CC:chloroplast;MF:kinase activity;MF:protein-ribulosamine 3-kinase activity;	K15523	FN3KRP	------	------	COG3001	G:Carbohydrate transport and metabolism	XP_004985963.1	protein-ribulosamine 3-kinase, chloroplastic [Setaria italica]	sp|A2XBT1|FN3KR_ORYSI;	Protein-ribulosamine 3-kinase, chloroplastic OS=Oryza sativa subsp. indica OX=39946 GN=OsI_09747 PE=3 SV=1;	PF03881.15;PF01636.24	Fructosamin_kin;APH	Fructosamine kinase;Phosphotransferase enzyme family
gene.CpA0601054.1	0	0	0	4.10667	3.61333	17.0633	GO:0048579;GO:0006355;GO:0009908;GO:0005737;GO:0005634;GO:0000978;GO:004698	BP:negative regulation of long-day photoperiodism, flowering;BP:regulation of transcription, DNA-templated;BP:flower development;CC:cytoplasm;CC:nucleus;MF:RNA polymerase II core promoter proximal region sequence-specific DNA binding;MF:protein heterodimerization activity;	------	------	------	------	COG5208	S:Function unknown	ACR36073.1	unknown [Zea mays]	sp|A6BLW4|NFYC2_ORYSJ;	Nuclear transcription factor Y subunit C-2 OS=Oryza sativa subsp. japonica OX=39947 GN=NFYC2 PE=1 SV=1;	PF00808.24;PF00125.25	CBFD_NFYB_HMF;Histone	Histone-like transcription factor;Core histone H2A/H2B/H3/H4
gene.CpA0601997.1	1.61667	2.34	4.4	12.3733	14.0533	96.1167	GO:0016020;GO:0016021;GO:004687	CC:membrane;CC:integral component of membrane;MF:metal ion transmembrane transporter activity;	K14709	SLC39A1_2_3, ZIP1_2_3	------	------	ENOG4111GP2	P:Inorganic ion transport and metabolism	XP_034576131.1	zinc transporter 2-like [Setaria viridis]	sp|Q852F6|ZIP2_ORYSJ;	Zinc transporter 2 OS=Oryza sativa subsp. japonica OX=39947 GN=ZIP2 PE=2 SV=1;	PF02535.23	Zip	ZIP Zinc transporter
gene.CpA0700954.1	19.6667	18.4367	28.3	31.0033	46.6433	118.45	GO:2000022;GO:000221	BP:regulation of jasmonic acid mediated signaling pathway;BP:defense response to insect;	K13463	COI-1	map04075	Plant hormone signal transduction	ENOG410XQ54	S:Function unknown	XP_034595805.1	coronatine-insensitive protein homolog 1a-like [Setaria viridis]	sp|A2WX30|COI1A_ORYSI;	Coronatine-insensitive protein homolog 1a OS=Oryza sativa subsp. indica OX=39946 GN=COI1A PE=3 SV=1;	PF18791.2;PF18511.2;PF12937.8	Transp_inhibit;F-box_5;F-box-like	Transport inhibitor response 1 protein domain;F-box;F-box-like
gene.CpA0701819.1	0.11	0.216667	0.416667	2.03667	1.26333	15.1167	GO:000425	MF:serine-type endopeptidase activity;	------	------	------	------	COG1404	S:Function unknown	XP_004969820.1	subtilisin-like protease SBT5.6 [Setaria italica]	sp|Q9FK76|SBT56_ARATH;	Subtilisin-like protease SBT5.6 OS=Arabidopsis thaliana OX=3702 GN=SBT5.6 PE=2 SV=1;	PF00082.23;PF17766.2;PF05922.17;PF02225.23	Peptidase_S8;fn3_6;Inhibitor_I9;PA	Subtilase family;Fibronectin type-III domain;Peptidase inhibitor I9;PA domain
gene.CpA0702729.1	54.9767	51.2767	66.9267	168.887	130.017	1630.8	GO:0006624;GO:0051603;GO:0005773;GO:0008233;GO:000419	BP:vacuolar protein processing;BP:proteolysis involved in cellular protein catabolic process;CC:vacuole;MF:peptidase activity;MF:cysteine-type endopeptidase activity;	K01369	LGMN	------	------	COG5206	O:Posttranslational modification, protein turnover, chaperones	XP_034596067.1	vacuolar-processing enzyme-like [Setaria viridis]	sp|P49043|VPE_CITSI;	Vacuolar-processing enzyme OS=Citrus sinensis OX=2711 PE=2 SV=1;	PF01650.19	Peptidase_C13	Peptidase C13 family
gene.CpB0101710.1	0.67	1.30667	1.26667	5.25	1.90667	41.94	GO:0006355;GO:0005634;GO:000367	BP:regulation of transcription, DNA-templated;CC:nucleus;MF:DNA binding;	------	------	------	------	ENOG41106HE	S:Function unknown	XP_004972635.1	NAC domain-containing protein 21/22 [Setaria italica]	sp|Q84TE6|NAC22_ARATH;	NAC domain-containing protein 21/22 OS=Arabidopsis thaliana OX=3702 GN=NAC021 PE=1 SV=2;	PF02365.16	NAM	No apical meristem
gene.CpB0200190.1	9.10333	11.1367	15.2333	26.8733	20.8133	196.357	GO:0046983;GO:000367	MF:protein dimerization activity;MF:DNA binding;	------	------	------	------	ENOG41122IK	S:Function unknown	RLN22942.1	uncharacterized protein C2845_PM07G39310 [Panicum miliaceum]	------	------	PF02892.16	zf-BED	BED zinc finger
gene.CpB0200265.1	0	0.146667	0.536667	2.63667	1.55333	6.33667	GO:001678	MF:hydrolase activity, acting on ester bonds;	------	------	------	------	ENOG41115TH	S:Function unknown	XP_034593471.1	GDSL esterase/lipase At1g31550-like [Setaria viridis]	sp|Q9FJ45|GDL83_ARATH;	GDSL esterase/lipase At5g45910 OS=Arabidopsis thaliana OX=3702 GN=At5g45910 PE=2 SV=1;	PF00657.23	Lipase_GDSL	GDSL-like Lipase/Acylhydrolase
gene.CpB0201206.1	2.24333	3.33667	4.01667	20.8033	94.3233	943.393	GO:000703	BP:vacuolar transport;	K12198	CHMP5, VPS60	map04144	Endocytosis	ENOG410XPDA	U:Intracellular trafficking, secretion, and vesicular transport	XP_022682346.1	vacuolar protein sorting-associated protein 60.1 [Setaria italica]	sp|Q9LPN5|VP601_ARATH;	Vacuolar protein sorting-associated protein 60.1 OS=Arabidopsis thaliana OX=3702 GN=VPS60-1 PE=1 SV=1;	PF03357.22;PF07207.12	Snf7;Lir1	Snf7;Light regulated protein Lir1
gene.CpB0203332.1	0	0.083333	0	13.9833	29.6267	239.813	GO:0018298;GO:0009765;GO:0009768;GO:0009416;GO:0009535;GO:0009941;GO:0009522;GO:0009523;GO:0016021;GO:0010287;GO:001616	BP:protein-chromophore linkage;BP:photosynthesis, light harvesting;BP:photosynthesis, light harvesting in photosystem I;BP:response to light stimulus;CC:chloroplast thylakoid membrane;CC:chloroplast envelope;CC:photosystem I;CC:photosystem II;CC:integral component of membrane;CC:plastoglobule;MF:chlorophyll binding;	K08912	LHCB1	map00196	Photosynthesis - antenna proteins	ENOG410ZHBU	J:Translation, ribosomal structure and biogenesis	XP_004969083.1	chlorophyll a-b binding protein of LHCII type 1 [Setaria italica]	sp|P12331|CB22_ORYSJ;	Chlorophyll a-b binding protein 2, chloroplastic OS=Oryza sativa subsp. japonica OX=39947 GN=CAB2R PE=2 SV=2;	PF00504.22	Chloroa_b-bind	Chlorophyll A-B binding protein
gene.CpB0205627.1	1.05	0.54	0.963333	10.8733	9.09667	42.4867	GO:0015812;GO:0016021;GO:0005313;GO:0003824;GO:0022857;GO:0015189;GO:0015185;GO:0015181;GO:001518	BP:gamma-aminobutyric acid transport;CC:integral component of membrane;MF:L-glutamate transmembrane transporter activity;MF:catalytic activity;MF:transmembrane transporter activity;MF:L-lysine transmembrane transporter activity;MF:gamma-aminobutyric acid transmembrane transporter activity;MF:arginine transmembrane transporter activity;MF:L-alanine transmembrane transporter activity;	------	------	------	------	COG0531	E:Amino acid transport and metabolism	XP_012701544.1	amino-acid permease BAT1 homolog isoform X3 [Setaria italica]	sp|B9EXZ6|BAT1_ORYSJ;	Amino-acid permease BAT1 homolog OS=Oryza sativa subsp. japonica OX=39947 GN=BAT1 PE=2 SV=1;	PF13520.7;PF00324.22	AA_permease_2;AA_permease	Amino acid permease;Amino acid permease
gene.CpB0301307.1	6.00667	9.28333	7.71	23.4033	21.47	83.6633	------	------	------	------	------	------	ENOG410YNP6	S:Function unknown	RCV11810.1	hypothetical protein SETIT_2G216500v2 [Setaria italica]	sp|Q8LD26|DRMH3_ARATH;	Dormancy-associated protein homolog 3 OS=Arabidopsis thaliana OX=3702 GN=At1g56220 PE=1 SV=1;	PF05564.13	Auxin_repressed	Dormancy/auxin associated protein
gene.CpB0400640.1	0.153333	0.646667	0.646667	13.2867	6.23333	67.5933	GO:0080006;GO:0045893;GO:0090229;GO:0005634;GO:004698	BP:internode patterning;BP:positive regulation of transcription, DNA-templated;BP:negative regulation of red or far-red light signaling pathway;CC:nucleus;MF:protein dimerization activity;	K16189	PIF4	map04075	Plant hormone signal transduction	ENOG410YAGK;ENOG4111ANS	K:Transcription;S:Function unknown	XP_004981539.1	transcription factor PIF4 isoform X1 [Setaria italica]	sp|Q10CH5|PIL13_ORYSJ;	Transcription factor PHYTOCHROME INTERACTING FACTOR-LIKE 13 OS=Oryza sativa subsp. japonica OX=39947 GN=PIL13 PE=1 SV=1;	PF00010.27	HLH	Helix-loop-helix DNA-binding domain
gene.CpB0403561.1	7.06	10.1667	23.0033	28.8633	44.7133	174.023	GO:0006535;GO:0005737;GO:0004124;GO:003017	BP:cysteine biosynthetic process from serine;CC:cytoplasm;MF:cysteine synthase activity;MF:pyridoxal phosphate binding;	K01738	cysK	map00270;map00920	Cysteine and methionine metabolism;Sulfur metabolism	COG0031	S:Function unknown	XP_004964842.1	cysteine synthase [Setaria italica]	sp|Q9XEA8|CYSK2_ORYSJ;	Cysteine synthase OS=Oryza sativa subsp. japonica OX=39947 GN=RCS3 PE=2 SV=1;	PF00291.26	PALP	Pyridoxal-phosphate dependent enzyme
gene.CpB0501748.1	0	0.26	0.496667	4.49333	4.87	36.4133	GO:0010258;GO:000957	BP:NADH dehydrogenase comple;CC:chloroplast stroma;	------	------	------	------	ENOG410Y3FX	T:Signal transduction mechanisms	XP_004984559.1	uncharacterized protein LOC101761479 [Setaria italica]	------	------	PF11347.9	DUF3148	Protein of unknown function
gene.CpB0502011.1	0	0.04	0	4.72667	3.55333	23.89	GO:0006355;GO:000369	BP:regulation of transcription, DNA-templated;MF:double-stranded DNA binding;	K15032	MTERFD	------	------	ENOG410XT49	S:Function unknown	OEL37534.1	hypothetical protein BAE44_0001447 [Dichanthelium oligosanthes]	sp|Q84X53|MTEF1_ARATH;	Transcription termination factor MTEF1, chloroplastic OS=Arabidopsis thaliana OX=3702 GN=MTERF1 PE=2 SV=2;	PF02536.15	mTERF	mTERF
gene.CpB0603429.1	1.17667	1.96333	2.64667	51.0733	143.167	1702.12	------	------	------	------	------	------	ENOG410XUIV	S:Function unknown	XP_034577895.1	uncharacterized protein YtoI-like [Setaria viridis]	sp|Q58629|Y1232_METJA;	Uncharacterized protein MJ1232 OS=Methanocaldococcus jannaschii;	PF00571.29	CBS	CBS domain

## Sheet: tan
Gene_id	R_SL	R_D	R_CK	L_SL	L_D	L_CK	GO_id	GO_term	KO_id	KO_name	Pathway_id	Pathway_definition	COG_id	COG_Functional Categories	NR_hit-name	NR_description	Swiss-Prot_hit-name	Swiss-Prot_description	Pfam_id	Domain	Domain description
gene.CpA0101985.1	1.19	4.88667	0.42	1.71	2.86667	0.166667	GO:0055114;GO:0016021;GO:0005886;GO:0050664;GO:0016174;GO:0005509;GO:000460	BP:oxidation-reduction process;CC:integral component of membrane;CC:plasma membrane;MF:oxidoreductase activity, acting on NA;MF:NA;MF:calcium ion binding;MF:peroxidase activity;	K13447	RBOH	map04016;map04626	MAPK signaling pathway - plant;Plant-pathogen interaction	ENOG410XNZY	U:Intracellular trafficking, secretion, and vesicular transport	TKW10604.1	hypothetical protein SEVIR_6G176500v2 [Setaria viridis]	sp|O81211|RBOHE_ARATH;	Respiratory burst oxidase homolog protein E OS=Arabidopsis thaliana OX=3702 GN=RBOHE PE=2 SV=2;	PF08030.13;PF08022.13;PF01794.20;PF08414.11;PF13202.7;PF13499.7;PF00036.33	NAD_binding_6;FAD_binding_8;Ferric_reduct;NADPH_Ox;EF-hand_5;EF-hand_7;EF-hand_1	Ferric reductase NAD binding domain;FAD-binding domain;Ferric reductase like transmembrane component;Respiratory burst NADPH oxidase;EF hand;EF-hand domain pair;EF hand
gene.CpA0101990.1	5.39	16.0733	1.05	4.79	8.06667	0.746667	GO:0055114;GO:0016021;GO:0005886;GO:0050664;GO:0016174;GO:0005509;GO:000460	BP:oxidation-reduction process;CC:integral component of membrane;CC:plasma membrane;MF:oxidoreductase activity, acting on NA;MF:NA;MF:calcium ion binding;MF:peroxidase activity;	K13447	RBOH	map04016;map04626	MAPK signaling pathway - plant;Plant-pathogen interaction	ENOG410XNZY	U:Intracellular trafficking, secretion, and vesicular transport	TKW10604.1	hypothetical protein SEVIR_6G176500v2 [Setaria viridis]	sp|O81211|RBOHE_ARATH;	Respiratory burst oxidase homolog protein E OS=Arabidopsis thaliana OX=3702 GN=RBOHE PE=2 SV=2;	PF08030.13;PF08414.11;PF08022.13;PF13499.7;PF13202.7;PF00036.33	NAD_binding_6;NADPH_Ox;FAD_binding_8;EF-hand_7;EF-hand_5;EF-hand_1	Ferric reductase NAD binding domain;Respiratory burst NADPH oxidase;FAD-binding domain;EF-hand domain pair;EF hand;EF hand
gene.CpA0102849.1	31.3067	63.8333	2.76	51.6	28.9533	1.47667	GO:0005737;GO:0005544;GO:000550	CC:cytoplasm;MF:calcium-dependent phospholipid binding;MF:calcium ion binding;	K17098	ANNAT	------	------	ENOG410XPUN	S:Function unknown	XP_034588815.1	annexin D4 [Setaria viridis]	sp|Q9ZVJ6|ANXD4_ARATH;	Annexin D4 OS=Arabidopsis thaliana OX=3702 GN=ANN4 PE=1 SV=1;	PF00191.21	Annexin	Annexin
gene.CpA0103028.1	80.3933	144.433	25.6867	67.2867	96.09	54.4633	GO:0009240;GO:0008299;GO:0005737;GO:0016787;GO:000445	BP:isopentenyl diphosphate biosynthetic process;BP:isoprenoid biosynthetic process;CC:cytoplasm;MF:hydrolase activity;MF:isopentenyl-diphosphate delta-isomerase activity;	K01823	idi, IDI	map00900	Terpenoid backbone biosynthesis	COG1443	Z:Cytoskeleton	XP_004962087.1	isopentenyl-diphosphate Delta-isomerase I [Setaria italica]	sp|Q39472|IDI1_CLABR;	Isopentenyl-diphosphate Delta-isomerase I OS=Clarkia breweri OX=36903 GN=IPI1 PE=2 SV=2;	PF00293.29	NUDIX	NUDIX domain
gene.CpA0105577.1	9.60333	16.4533	2.02333	14.6167	15.7233	4.7	GO:0016791;GO:0020037;GO:0016705;GO:0003824;GO:0008270;GO:0003676;GO:000550	MF:phosphatase activity;MF:heme binding;MF:oxidoreductase activity, acting on paired donors, with incorporation or reduction of molecular oxygen;MF:catalytic activity;MF:zinc ion binding;MF:nucleic acid binding;MF:iron ion binding;	K15634	gpmB	map00010;map00260	Glycolysis / Gluconeogenesis;Glycine, serine and threonine metabolism	COG0406	G:Carbohydrate transport and metabolism	XP_004978619.1	phosphoglycerate mutase-like protein 4 [Setaria italica]	sp|Q9SCS3|PGML4_ARATH;	Phosphoglycerate mutase-like protein 4 OS=Arabidopsis thaliana OX=3702 GN=At3g50520 PE=2 SV=1;	PF00300.23	His_Phos_1	Histidine phosphatase superfamily
gene.CpA0200442.1	1.93667	6.68333	0.893333	3.87333	5.26333	0.816667	GO:0030154;GO:0010119;GO:0005634;GO:0043565;GO:0044212;GO:0003700;GO:000367	BP:cell differentiation;BP:regulation of stomatal movement;CC:nucleus;MF:sequence-specific DNA binding;MF:transcription regulatory region DNA binding;MF:transcription factor activity, sequence-specific DNA binding;MF:DNA binding;	K09422	MYBP	------	------	COG5147	Q:Secondary metabolites biosynthesis, transport and catabolism	RLN34050.1	myb-related protein Zm1-like [Panicum miliaceum]	sp|Q8VZQ2|MYB61_ARATH;	Transcription factor MYB61 OS=Arabidopsis thaliana OX=3702 GN=MYB61 PE=2 SV=1;	PF00249.32;PF13921.7	Myb_DNA-binding;Myb_DNA-bind_6	Myb-like DNA-binding domain;Myb-like DNA-binding domain
gene.CpA0201611.1	31.9433	47.2	7.82667	19.6933	73.52	16.5367	GO:0016042;GO:0012501;GO:0090333;GO:0009409;GO:0009789;GO:0046470;GO:0046473;GO:0005773;GO:0016020;GO:0009506;GO:0005886;GO:0003824;GO:0070290;GO:0005509;GO:000463	BP:lipid catabolic process;BP:programmed cell death;BP:regulation of stomatal closure;BP:response to cold;BP:positive regulation of abscisic acid-activated signaling pathway;BP:phosphatidylcholine metabolic process;BP:phosphatidic acid metabolic process;CC:vacuole;CC:membrane;CC:plasmodesma;CC:plasma membrane;MF:catalytic activity;MF:N-acylphosphatidylethanolamine-specific phospholipase D activit…	K01115	PLD1_2	map00565;map00564;map04144	Ether lipid metabolism;Glycerophospholipid metabolism;Endocytosis	COG1502	I:Lipid transport and metabolism	XP_034580520.1	phospholipase D delta [Setaria viridis]	sp|Q9C5Y0|PLDD1_ARATH;	Phospholipase D delta OS=Arabidopsis thaliana OX=3702 GN=PLDDELTA PE=1 SV=2;	PF12357.9;PF00168.31;PF00614.23;PF13091.7	PLD_C;C2;PLDc;PLDc_2	Phospholipase D C terminal;C2 domain;Phospholipase D Active site motif;PLD-like domain
gene.CpA0201626.1	6.73333	8.52667	1.62	5.12667	12.7433	3.06667	GO:0016042;GO:0012501;GO:0090333;GO:0009409;GO:0009789;GO:0046470;GO:0046473;GO:0005773;GO:0016020;GO:0009506;GO:0005886;GO:0003824;GO:0070290;GO:0005509;GO:000463	BP:lipid catabolic process;BP:programmed cell death;BP:regulation of stomatal closure;BP:response to cold;BP:positive regulation of abscisic acid-activated signaling pathway;BP:phosphatidylcholine metabolic process;BP:phosphatidic acid metabolic process;CC:vacuole;CC:membrane;CC:plasmodesma;CC:plasma membrane;MF:catalytic activity;MF:N-acylphosphatidylethanolamine-specific phospholipase D activit…	K01115	PLD1_2	map00565;map00564;map04144	Ether lipid metabolism;Glycerophospholipid metabolism;Endocytosis	COG1502	I:Lipid transport and metabolism	XP_025801144.1	phospholipase D delta [Panicum hallii]	sp|Q9C5Y0|PLDD1_ARATH;	Phospholipase D delta OS=Arabidopsis thaliana OX=3702 GN=PLDDELTA PE=1 SV=2;	PF12357.9	PLD_C	Phospholipase D C terminal
gene.CpA0202256.1	68.0033	128.737	5.68333	58.07	69.7233	8.71	GO:0016021;GO:0016020;GO:0004497;GO:0016705;GO:0020037;GO:0016709;GO:000550	CC:integral component of membrane;CC:membrane;MF:monooxygenase activity;MF:oxidoreductase activity, acting on paired donors, with incorporation or reduction of molecular oxygen;MF:heme binding;MF:oxidoreductase activity, acting on paired donors, with incorporation or reduction of molecular oxygen, NA;MF:iron ion binding;	K20623	CYP92A6	map00905	Brassinosteroid biosynthesis	COG2124	Q:Secondary metabolites biosynthesis, transport and catabolism	XP_004956935.1	flavonoid 3'-monooxygenase [Setaria italica]	sp|A0A1D6F9Y9|C92C6_MAIZE;	Trimethyltridecatetraene synthase OS=Zea mays OX=4577 GN=CYP92C6 PE=1 SV=1;	PF00067.23	p450	Cytochrome P450
gene.CpA0202265.1	22.2033	44.4133	2.89667	37.0133	40.8367	2.55	GO:0016020;GO:0016021;GO:0004497;GO:0020037;GO:0016709;GO:0016705;GO:000550	CC:membrane;CC:integral component of membrane;MF:monooxygenase activity;MF:heme binding;MF:oxidoreductase activity, acting on paired donors, with incorporation or reduction of molecular oxygen, NA;MF:oxidoreductase activity, acting on paired donors, with incorporation or reduction of molecular oxygen;MF:iron ion binding;	K20623	CYP92A6	map00905	Brassinosteroid biosynthesis	COG2124	S:Function unknown	XP_034578497.1	trimethyltridecatetraene synthase-like [Setaria viridis]	sp|A0A1D6F9Y9|C92C6_MAIZE;	Trimethyltridecatetraene synthase OS=Zea mays OX=4577 GN=CYP92C6 PE=1 SV=1;	PF00067.23	p450	Cytochrome P450
gene.CpA0300184.1	15.6267	21.15	1.56	12.5167	15.7067	6.20667	GO:001602	CC:integral component of membrane;	------	------	------	------	ENOG410YJFI	T:Signal transduction mechanisms	XP_004977404.1	uncharacterized protein LOC101780220 [Setaria italica]	------	------	PF03168.14	LEA_2	Late embryogenesis abundant protein
gene.CpA0300752.1	3.98333	5.21667	0.706667	5.35667	6.62667	0.536667	GO:0046658;GO:0016021;GO:000950	CC:anchored component of plasma membrane;CC:integral component of membrane;CC:plasmodesma;	------	------	------	------	ENOG41106HS;ENOG410YGTR	S:Function unknown;	XP_004978732.1	NDR1/HIN1-like protein 1 [Setaria italica]	sp|Q9SRN0|NHL1_ARATH;	NDR1/HIN1-like protein 1 OS=Arabidopsis thaliana OX=3702 GN=NHL1 PE=2 SV=1;	PF03168.14	LEA_2	Late embryogenesis abundant protein
gene.CpA0301966.1	1.15333	1.65667	0.31	1.17333	2.2	0.673333	GO:0006952;GO:0005524;GO:004353	BP:defense response;MF:ATP binding;MF:ADP binding;	------	------	------	------	ENOG41104SX	S:Function unknown	XP_034599868.1	disease resistance protein Pik-2-like [Setaria viridis]	sp|P0DO07|PIK2_ORYSJ;	Disease resistance protein Pik-2 OS=Oryza sativa subsp. japonica OX=39947 GN=PIK-2 PE=3 SV=1;	PF00931.23;PF18052.2;PF13191.7	NB-ARC;Rx_N;AAA_16	NB-ARC domain;Rx N-terminal domain;AAA ATPase domain
gene.CpA0401857.1	7.75667	10.4167	1.60333	9.60667	7.99667	3.82333	GO:0004497;GO:000550	MF:monooxygenase activity;MF:calcium ion binding;	K17991	PXG	map00073	Cutin, suberine and wax biosynthesis	ENOG410YGB5	S:Function unknown	XP_012701052.1	probable peroxygenase 5 [Setaria italica]	sp|Q9CAB7|PXG4_ARATH;	Probable peroxygenase 4 OS=Arabidopsis thaliana OX=3702 GN=PXG4 PE=1 SV=1;	PF05042.14	Caleosin	Caleosin related protein
gene.CpA0403417.1	97.6867	102.563	19.3467	137.787	108.08	23.3933	GO:0010124;GO:0006635;GO:0005777;GO:0003988;GO:001674	BP:phenylacetate catabolic process;BP:fatty acid beta-oxidation;CC:peroxisome;MF:acetyl-CoA C-acyltransferase activity;MF:transferase activity, transferring acyl groups other than amino-acyl groups;	K07513	ACAA1	map04146;map00592;map00280;map01040;map00071	Peroxisome;alpha-Linolenic acid metabolism;Valine, leucine and isoleucine degradation;Biosynthesis of unsaturated fatty acids;Fatty acid degradation	COG0183	I:Lipid transport and metabolism	XP_004982961.1	3-ketoacyl-CoA thiolase 2, peroxisomal [Setaria italica]	sp|Q56WD9|THIK2_ARATH;	3-ketoacyl-CoA thiolase 2, peroxisomal OS=Arabidopsis thaliana OX=3702 GN=PED1 PE=1 SV=2;	PF02803.19;PF00108.24	Thiolase_C;Thiolase_N	Thiolase, C-terminal domain;Thiolase, N-terminal domain
gene.CpA0503874.1	9.29	18.5	1.49667	23.3833	59.8067	3.45333	------	------	K06995	K06995	------	------	COG3450	S:Function unknown	XP_004953125.1	uncharacterized protein LOC101768576 [Setaria italica]	------	------	PF05899.13	Cupin_3	Protein of unknown function
gene.CpA0601309.1	2.01	8.58667	0.57	4.85333	11.8567	0.346667	GO:0009658;GO:0009941;GO:000970	BP:chloroplast organization;CC:chloroplast envelope;CC:chloroplast outer membrane;	------	------	------	------	ENOG410YEKY	S:Function unknown	XP_004984865.1	protein CHUP1, chloroplastic [Setaria italica]	sp|Q9LI74|CHUP1_ARATH;	Protein CHUP1, chloroplastic OS=Arabidopsis thaliana OX=3702 GN=CHUP1 PE=1 SV=1;	PF01166.19;PF08961.11	TSC22;NRBF2	TSC-22/dip/bun family;Nuclear receptor-binding factor 2, autophagy regulator
gene.CpA0701107.1	34.7867	72.35	1.78667	27.0667	81.5433	6.30667	GO:0055114;GO:0016021;GO:0005886;GO:0050664;GO:0016174;GO:0005509;GO:000460	BP:oxidation-reduction process;CC:integral component of membrane;CC:plasma membrane;MF:oxidoreductase activity, acting on NA;MF:NA;MF:calcium ion binding;MF:peroxidase activity;	------	------	------	------	ENOG410XNZY	S:Function unknown	XP_034594425.1	putative respiratory burst oxidase homolog protein H [Setaria viridis]	sp|Q9FJD6|RBOHH_ARATH;	Putative respiratory burst oxidase homolog protein H OS=Arabidopsis thaliana OX=3702 GN=RBOHH PE=3 SV=1;	PF08030.13;PF08414.11;PF08022.13;PF01794.20;PF13405.7;PF13499.7;PF00036.33	NAD_binding_6;NADPH_Ox;FAD_binding_8;Ferric_reduct;EF-hand_6;EF-hand_7;EF-hand_1	Ferric reductase NAD binding domain;Respiratory burst NADPH oxidase;FAD-binding domain;Ferric reductase like transmembrane component;EF-hand domain;EF-hand domain pair;EF hand
gene.CpA0702780.1	3.13	4.92	0.123333	3.1	4.01667	0.316667	GO:001602	CC:integral component of membrane;	------	------	------	------	ENOG41105CB;ENOG410YXA1	S:Function unknown;	XP_025819355.1	uncharacterized protein LOC112895600 isoform X2 [Panicum hallii]	sp|O22897|DUF6_ARATH;	DUF724 domain-containing protein 6 OS=Arabidopsis thaliana OX=3702 GN=DUF6 PE=2 SV=1;	PF05266.15;PF05641.13	DUF724;Agenet	Protein of unknown function;Agenet domain
gene.CpA0703397.1	4.06333	6.64667	1.41	5.19667	8.48	3.11667	GO:0006646;GO:0006659;GO:0016021;GO:0005789;GO:0016740;GO:000388	BP:phosphatidylethanolamine biosynthetic process;BP:phosphatidylserine biosynthetic process;CC:integral component of membrane;CC:endoplasmic reticulum membrane;MF:transferase activity;MF:CDP-diacylglycerol-serine O-phosphatidyltransferase activity;	K08730	PTDSS2	map00564	Glycerophospholipid metabolism	ENOG410XS7H	S:Function unknown	XP_034597120.1	CDP-diacylglycerol--serine O-phosphatidyltransferase 1 [Setaria viridis]	sp|Q0JR55|PSS1_ORYSJ;	CDP-diacylglycerol--serine O-phosphatidyltransferase 1 OS=Oryza sativa subsp. japonica OX=39947 GN=PSS1 PE=2 SV=2;	PF03034.16	PSS	Phosphatidyl serine synthase
gene.CpB0102210.1	5.44667	19.1333	0.766667	5.96333	6.26333	1.49667	GO:0055114;GO:0016021;GO:0005886;GO:0050664;GO:0016174;GO:0005509;GO:000460	BP:oxidation-reduction process;CC:integral component of membrane;CC:plasma membrane;MF:oxidoreductase activity, acting on NA;MF:NA;MF:calcium ion binding;MF:peroxidase activity;	K13447	RBOH	map04016;map04626	MAPK signaling pathway - plant;Plant-pathogen interaction	ENOG410XNZY	U:Intracellular trafficking, secretion, and vesicular transport	TKW10604.1	hypothetical protein SEVIR_6G176500v2 [Setaria viridis]	sp|O81211|RBOHE_ARATH;	Respiratory burst oxidase homolog protein E OS=Arabidopsis thaliana OX=3702 GN=RBOHE PE=2 SV=2;	PF08030.13;PF08414.11;PF08022.13;PF01794.20;PF13499.7;PF13202.7;PF00036.33	NAD_binding_6;NADPH_Ox;FAD_binding_8;Ferric_reduct;EF-hand_7;EF-hand_5;EF-hand_1	Ferric reductase NAD binding domain;Respiratory burst NADPH oxidase;FAD-binding domain;Ferric reductase like transmembrane component;EF-hand domain pair;EF hand;EF hand
gene.CpB0103289.1	1.37	2.88	0.753333	2.37667	4.88	0.236667	GO:0006631;GO:0006635;GO:0005777;GO:000385	BP:fatty acid metabolic process;BP:fatty acid beta-oxidation;CC:peroxisome;MF:3-hydroxyacyl-CoA dehydrogenase activity;	K10527	MFP2	map00592;map00071	alpha-Linolenic acid metabolism;Fatty acid degradation	COG1250	I:Lipid transport and metabolism	XP_004962329.1	glyoxysomal fatty acid beta-oxidation multifunctional protein MFP-a isoform X2 [Setaria italica]	sp|Q39659|MFPA_CUCSA;	Glyoxysomal fatty acid beta-oxidation multifunctional protein MFP-a OS=Cucumis sativus OX=3659 PE=1 SV=1;	PF02737.19;PF00378.21;PF00725.23;PF16113.6	3HCDH_N;ECH_1;3HCDH;ECH_2	3-hydroxyacyl-CoA dehydrogenase, NAD binding domain;Enoyl-CoA hydratase/isomerase;3-hydroxyacyl-CoA dehydrogenase, C-terminal domain;Enoyl-CoA hydratase/isomerase
gene.CpB0103297.1	7.57	12.2967	2.33333	7.63	12.76	1.75	GO:0006631;GO:0006635;GO:0005777;GO:000385	BP:fatty acid metabolic process;BP:fatty acid beta-oxidation;CC:peroxisome;MF:3-hydroxyacyl-CoA dehydrogenase activity;	K10527	MFP2	map00592;map00071	alpha-Linolenic acid metabolism;Fatty acid degradation	COG1250	I:Lipid transport and metabolism	XP_004962329.1	glyoxysomal fatty acid beta-oxidation multifunctional protein MFP-a isoform X2 [Setaria italica]	sp|Q39659|MFPA_CUCSA;	Glyoxysomal fatty acid beta-oxidation multifunctional protein MFP-a OS=Cucumis sativus OX=3659 PE=1 SV=1;	PF00378.21;PF16113.6;PF02737.19;PF00725.23	ECH_1;ECH_2;3HCDH_N;3HCDH	Enoyl-CoA hydratase/isomerase;Enoyl-CoA hydratase/isomerase;3-hydroxyacyl-CoA dehydrogenase, NAD binding domain;3-hydroxyacyl-CoA dehydrogenase, C-terminal domain
gene.CpB0103401.1	17.9267	35.4833	4.77	26.81	23.84	3.15333	GO:0005737;GO:0005544;GO:000550	CC:cytoplasm;MF:calcium-dependent phospholipid binding;MF:calcium ion binding;	K17098	ANNAT	------	------	ENOG410XPUN	S:Function unknown	XP_034585711.1	annexin D3-like [Setaria viridis]	sp|Q9SE45|ANXD3_ARATH;	Annexin D3 OS=Arabidopsis thaliana OX=3702 GN=ANN3 PE=2 SV=2;	PF00191.21	Annexin	Annexin
gene.CpB0204987.1	1.48333	1.9	0.12	1.94	1.98667	0.083333	------	------	------	------	------	------	ENOG410Z3BB	S:Function unknown	XP_004970643.1	uncharacterized protein LOC101768020 [Setaria italica]	------	------	------	------	------
gene.CpB0300982.1	5.57333	16.1433	3.97667	15.54	19.9567	1.82	GO:0009833;GO:0030244;GO:0071555;GO:0005794;GO:0016021;GO:0005802;GO:0005886;GO:0016760;GO:0016759;GO:004687	BP:plant-type primary cell wall biogenesis;BP:cellulose biosynthetic process;BP:cell wall organization;CC:Golgi apparatus;CC:integral component of membrane;CC:trans-Golgi network;CC:plasma membrane;MF:cellulose synthas;MF:cellulose synthase activity;MF:metal ion binding;	K10999	CESA	------	------	COG1215	M:Cell wall/membrane/envelope biogenesis	XP_004956060.1	probable cellulose synthase A catalytic subunit 3 [UDP-forming] isoform X1 [Setaria italica]	sp|Q69V23|CESA3_ORYSJ;	Probable cellulose synthase A catalytic subunit 3 [UDP-forming] OS=Oryza sativa subsp. japonica OX=39947 GN=CESA3 PE=2 SV=1;	PF03552.15;PF14569.7;PF13632.7;PF14570.7;PF00535.27	Cellulose_synt;zf-UDP;Glyco_trans_2_3;zf-RING_4;Glycos_transf_2	Cellulose synthase;Zinc-binding RING-finger;Glycosyl transferase family group 2;RING/Ubox like zinc-binding domain;Glycosyl transferase family 2
gene.CpB0401464.1	6.94333	8.10667	1.38667	8.6	15.5033	1.06667	GO:0007017;GO:0000278;GO:0000226;GO:0005737;GO:0005874;GO:0003924;GO:0005200;GO:000552	BP:microtubule-based process;BP:mitotic cell cycle;BP:microtubule cytoskeleton organization;CC:cytoplasm;CC:microtubule;MF:GTPase activity;MF:structural constituent of cytoskeleton;MF:GTP binding;	K07375	TUBB	map04145	Phagosome	COG5023	S:Function unknown	XP_034574478.1	tubulin beta-3 chain [Setaria viridis]	sp|Q43695|TBB3_MAIZE;	Tubulin beta-3 chain OS=Zea mays OX=4577 GN=TUBB3 PE=2 SV=1;	PF03953.18;PF00091.26	Tubulin_C;Tubulin	Tubulin C-terminal domain;Tubulin/FtsZ family, GTPase domain
gene.CpB0500186.1	26.8533	27.7667	6.56667	31.5533	24.2067	8.82333	GO:0015979;GO:0019898;GO:0009654;GO:000550	BP:photosynthesis;CC:extrinsic component of membrane;CC:photosystem II oxygen evolving complex;MF:calcium ion binding;	K02717	psbP	map00195	Photosynthesis	ENOG4111N4V	G:Carbohydrate transport and metabolism	XP_004985924.1	psbP-like protein 1, chloroplastic [Setaria italica]	sp|P82538|PPL1_ARATH;	PsbP-like protein 1, chloroplastic OS=Arabidopsis thaliana OX=3702 GN=PPL1 PE=1 SV=1;	PF01789.17;PF18933.1	PsbP;PsbP_2	PsbP;PsbP-like protein
gene.CpB0501146.1	13.6733	15	2.13667	20.0533	11.86	3.65667	GO:0005975;GO:0046658;GO:0016021;GO:000455	BP:carbohydrate metabolic process;CC:anchored component of plasma membrane;CC:integral component of membrane;MF:hydrolase activity, hydrolyzing O-glycosyl compounds;	------	------	------	------	ENOG41108RD	S:Function unknown	XP_004978982.1	glucan endo-1,3-beta-glucosidase 7 [Setaria italica]	sp|Q9M069|E137_ARATH;	Glucan endo-1,3-beta-glucosidase 7 OS=Arabidopsis thaliana OX=3702 GN=At4g34480 PE=1 SV=2;	PF00332.19	Glyco_hydro_17	Glycosyl hydrolases family 17
gene.CpB0700954.1	12.2633	20.1067	2.98667	21.1133	41.6433	1.46333	GO:0005975;GO:0016021;GO:0008422;GO:000455	BP:carbohydrate metabolic process;CC:integral component of membrane;MF:beta-glucosidase activity;MF:hydrolase activity, hydrolyzing O-glycosyl compounds;	K05350	bglB	map00460;map00940;map00500	Cyanoamino acid metabolism;Phenylpropanoid biosynthesis;Starch and sucrose metabolism	COG2723	G:Carbohydrate transport and metabolism	XP_034605963.1	beta-glucosidase 18-like isoform X2 [Setaria viridis]	sp|Q7XSK0|BGL18_ORYSJ;	Beta-glucosidase 18 OS=Oryza sativa subsp. japonica OX=39947 GN=BGLU18 PE=3 SV=2;	PF00232.19	Glyco_hydro_1	Glycosyl hydrolase family 1

## Sheet: salmon
Gene_id	R_SL	R_D	R_CK	L_SL	L_D	L_CK	GO_id	GO_term	KO_id	KO_name	Pathway_id	Pathway_definition	COG_id	COG_Functional Categories	NR_hit-name	NR_description	Swiss-Prot_hit-name	Swiss-Prot_description	Pfam_id	Domain	Domain description
gene.Cp0000455.1	1.19	1.82667	24.2967	3.05	2.9	3.43667	GO:0046872;GO:0016874;GO:000552	MF:metal ion binding;MF:ligase activity;MF:ATP binding;	K01968	E6.4.1.4A	map00280	Valine, leucine and isoleucine degradation	COG4770	I:Lipid transport and metabolism	XP_004963117.1	methylcrotonoyl-CoA carboxylase subunit alpha, mitochondrial [Setaria italica]	sp|Q2QMG2|MCCA_ORYSJ;	Methylcrotonoyl-CoA carboxylase subunit alpha, mitochondrial OS=Oryza sativa subsp. japonica OX=39947 GN=MCCA PE=2 SV=2;	PF02786.18;PF00289.23;PF02785.20;PF00364.23;PF07478.14;PF13533.7;PF14397.7	CPSase_L_D2;Biotin_carb_N;Biotin_carb_C;Biotin_lipoyl;Dala_Dala_lig_C;Biotin_lipoyl_2;ATPgrasp_ST	Carbamoyl-phosphate synthase L chain, ATP binding domain;Biotin carboxylase, N-terminal domain;Biotin carboxylase C-terminal domain;Biotin-requiring enzyme;D-ala D-ala ligase C-terminus;Biotin-lipoyl like;Sugar-transfer associated ATP-grasp
gene.CpA0100739.1	5.54333	5.73	239.97	19.8933	27.3267	16.46	GO:0005576;GO:000486	CC:extracellular region;MF:serine-type endopeptidase inhibitor activity;	------	------	------	------	ENOG41107F6	S:Function unknown	XP_034606494.1	Bowman-Birk type trypsin inhibitor-like [Setaria viridis]	sp|P81713|IBB3_WHEAT;	Bowman-Birk type trypsin inhibitor OS=Triticum aestivum OX=4565 PE=1 SV=1;	PF00228.21	Bowman-Birk_leg	Bowman-Birk serine protease inhibitor family
gene.CpA0102576.1	1.75333	1.49667	11.8733	4.28667	6.52	2.58333	GO:0009435;GO:0051176;GO:0009060;GO:0034628;GO:0009507;GO:0008987;GO:0046872;GO:0051539;GO:0008047;GO:004280	BP:NAD biosynthetic process;BP:positive regulation of sulfur metabolic process;BP:aerobic respiration;BP:'de novo' NAD biosynthetic process from aspartate;CC:chloroplast;MF:quinolinate synthetase A activity;MF:metal ion binding;MF:4 iron, 4 sulfur cluster binding;MF:enzyme activator activity;MF:protein homodimerization activity;	K03517	nadA	map00760	Nicotinate and nicotinamide metabolism	COG2166;COG0379	S:Function unknown;H:Coenzyme transport and metabolism	XP_034587630.1	quinolinate synthase, chloroplastic-like [Setaria viridis]	sp|Q2QTL0|NADA_ORYSJ;	Quinolinate synthase, chloroplastic OS=Oryza sativa subsp. japonica OX=39947 GN=Os12g0290150 PE=3 SV=2;	PF02445.17;PF02657.16	NadA;SufE	Quinolinate synthetase A protein;Fe-S metabolism associated domain
gene.CpA0104511.1	19.4467	12.6167	85.9267	38.87	37.19	12.1833	GO:0006552;GO:0005739;GO:0003995;GO:0050660;GO:000847	BP:leucine catabolic process;CC:mitochondrion;MF:acyl-CoA dehydrogenase activity;MF:flavin adenine dinucleotide binding;MF:isovaleryl-CoA dehydrogenase activity;	K00253	IVD, ivd	map00280	Valine, leucine and isoleucine degradation	ENOG410XNMY	I:Lipid transport and metabolism	CAB3460070.1	unnamed protein product [Digitaria exilis]	sp|Q75IM9|IVD_ORYSJ;	Isovaleryl-CoA dehydrogenase, mitochondrial OS=Oryza sativa subsp. japonica OX=39947 GN=Os05g0125500 PE=2 SV=2;	PF00441.25;PF02771.17;PF02770.20;PF08028.12;PF11794.9	Acyl-CoA_dh_1;Acyl-CoA_dh_N;Acyl-CoA_dh_M;Acyl-CoA_dh_2;HpaB_N	Acyl-CoA dehydrogenase, C-terminal domain;Acyl-CoA dehydrogenase, N-terminal domain;Acyl-CoA dehydrogenase, middle domain;Acyl-CoA dehydrogenase, C-terminal domain;4-hydroxyphenylacetate 3-hydroxylase N terminal
gene.CpA0200018.1	0.61	1.25667	5.37	1.31333	1.16667	1.01	GO:0016567;GO:0006464;GO:0006974;GO:0032446;GO:0006511;GO:0005737;GO:0005634;GO:0008641;GO:0004839;GO:000552	BP:protein ubiquitination;BP:cellular protein modification process;BP:cellular response to DNA damage stimulus;BP:protein modification by small protein conjugation;BP:ubiquitin-dependent protein catabolic process;CC:cytoplasm;CC:nucleus;MF:small protein activating enzyme activity;MF:ubiquitin activating enzyme activity;MF:ATP binding;	K03178	UBE1, UBA1	map04120	Ubiquitin mediated proteolysis	COG0476	H:Coenzyme transport and metabolism	XP_004958791.1	ubiquitin-activating enzyme E1 3 isoform X1 [Setaria italica]	sp|P31252|UBE13_WHEAT;	Ubiquitin-activating enzyme E1 3 OS=Triticum aestivum OX=4565 GN=UBA3 PE=1 SV=1;	PF00899.22;PF10585.10;PF16190.6;PF09358.11;PF16191.6	ThiF;UBA_e1_thiolCys;E1_FCCH;E1_UFD;E1_4HB	ThiF family;Ubiquitin-activating enzyme active site;Ubiquitin-activating enzyme E1 FCCH domain;Ubiquitin fold domain;Ubiquitin-activating enzyme E1 four-helix bundle
gene.CpA0203545.1	6.75	4.60667	19.0167	7.25	6.23667	7.58333	GO:0005829;GO:000825	CC:cytosol;MF:nucleotidase activity;	K03787	surE	map00240;map00230;map00760	Pyrimidine metabolism;Purine metabolism;Nicotinate and nicotinamide metabolism	COG0496	F:Nucleotide transport and metabolism	XP_004955782.1	uncharacterized protein LOC101786107 [Setaria italica]	sp|C0ZGV3|SURE_BREBN;	5'-nucleotidase SurE OS=Brevibacillus brevis;	PF01975.18	SurE	Survival protein SurE
gene.CpA0302161.1	0.046667	0.076667	9.50667	1.96333	0.41	1.77333	GO:0009809;GO:0016616;GO:0052747;GO:0045551;GO:0008270;GO:001649	BP:lignin biosynthetic process;MF:oxidoreductase activity, acting on the CH-OH group of donors, NAD or NADP as acceptor;MF:sinapyl alcohol dehydrogenase activity;MF:cinnamyl-alcohol dehydrogenase activity;MF:zinc ion binding;MF:oxidoreductase activity;	osa;K23232;obr	;10HGO;	map00902	Monoterpenoid biosynthesis	COG1064	S:Function unknown	XP_034600718.1	probable cinnamyl alcohol dehydrogenase 5 [Setaria viridis]	sp|Q0J6T3|CADH5_ORYSJ;	Probable cinnamyl alcohol dehydrogenase 5 OS=Oryza sativa subsp. japonica OX=39947 GN=CAD5 PE=3 SV=2;	PF08240.13;PF00107.27;PF01262.22;PF16912.6;PF13602.7	ADH_N;ADH_zinc_N;AlaDh_PNT_C;Glu_dehyd_C;ADH_zinc_N_2	Alcohol dehydrogenase GroES-like domain;Zinc-binding dehydrogenase;Alanine dehydrogenase/PNT, C-terminal domain;Glucose dehydrogenase C-terminus;Zinc-binding dehydrogenase
gene.CpA0303169.1	6.90333	12.5267	97.0433	20.37	34.1	18.9967	GO:0071705;GO:0016021;GO:0016020;GO:0005274;GO:0022857;GO:001550	BP:nitrogen compound transport;CC:integral component of membrane;CC:membrane;MF:allantoin uptake transmembrane transporter activity;MF:transmembrane transporter activity;MF:uraci;	------	------	------	------	ENOG410YFDW	S:Function unknown	XP_025805681.1	ureide permease 1-like isoform X2 [Panicum hallii]	sp|Q9ZQ89|UPS2_ARATH;	Ureide permease 2 OS=Arabidopsis thaliana OX=3702 GN=UPS2 PE=1 SV=2;	PF07168.12;PF06800.13;PF07857.13	Ureide_permease;Sugar_transport;TMEM144	Ureide permease;Sugar transport protein;Transmembrane family, TMEM144 of transporters
gene.CpA0303409.1	3.92333	2.66333	13.1	4.57667	3.25667	4.43	GO:0018230;GO:0006612;GO:0006629;GO:0005794;GO:0005783;GO:0016021;GO:0008081;GO:001970	BP:peptidyl-L-cysteine S-palmitoylation;BP:protein targeting to membrane;BP:lipid metabolic process;CC:Golgi apparatus;CC:endoplasmic reticulum;CC:integral component of membrane;MF:phosphoric diester hydrolase activity;MF:protein-cysteine S-palmitoyltransferase activity;	K16675	ZDHHC9_14_18	------	------	COG5273	S:Function unknown	XP_034600469.1	protein S-acyltransferase 8-like isoform X2 [Setaria viridis]	sp|Q9SB58|ZDH19_ARATH;	Protein S-acyltransferase 8 OS=Arabidopsis thaliana OX=3702 GN=PAT08 PE=1 SV=2;	PF01529.21	DHHC	DHHC palmitoyltransferase
gene.CpA0405118.1	0.926667	0.4	7.01667	2.02	1.67	0.083333	GO:0046872;GO:0051213;GO:001649	MF:metal ion binding;MF:dioxygenase activity;MF:oxidoreductase activity;	------	------	------	------	COG3491	S:Function unknown	TVU44094.1	hypothetical protein EJB05_03526 [Eragrostis curvula]	sp|C8VK14|HXNY_EMENI;	2-oxoglutarate-F;	PF14226.7;PF03171.21	DIOX_N;2OG-FeII_Oxy	non-haem dioxygenase in morphine synthesis N-terminal;2OG-F
gene.CpA0405164.1	3.80667	1.02	41.15	8.02	16.2767	0.563333	GO:0046872;GO:0051213;GO:001649	MF:metal ion binding;MF:dioxygenase activity;MF:oxidoreductase activity;	------	------	------	------	COG3491	S:Function unknown	TVU44094.1	hypothetical protein EJB05_03526 [Eragrostis curvula]	sp|C8VK14|HXNY_EMENI;	2-oxoglutarate-F;	PF14226.7;PF03171.21	DIOX_N;2OG-FeII_Oxy	non-haem dioxygenase in morphine synthesis N-terminal;2OG-F
gene.CpA0600127.1	0.893333	1.53	14.5533	4.05667	1.83667	0.71	GO:0030001;GO:004687	BP:metal ion transport;MF:metal ion binding;	------	------	------	------	COG2608	S:Function unknown	XP_004985936.1	heavy metal-associated isoprenylated plant protein 30 [Setaria italica]	sp|F4JMB8|HIP44_ARATH;	Heavy metal-associated isoprenylated plant protein 44 OS=Arabidopsis thaliana OX=3702 GN=HIPP44 PE=2 SV=1;	PF00403.27	HMA	Heavy-metal-associated domain
gene.CpA0600913.1	0.32	0.666667	5.9	1.85333	0.613333	0.36	GO:0051560;GO:0005739;GO:001529	BP:mitochondrial calcium ion homeostasis;CC:mitochondrion;MF:uniporter activity;	K20858	MCU	------	------	ENOG410Y3YU;ENOG41107AJ	S:Function unknown;	PUZ42091.1	hypothetical protein GQ55_9G556500 [Panicum hallii var. hallii]	sp|O64823|MCU2_ARATH;	Calcium uniporter protein 2, mitochondrial OS=Arabidopsis thaliana OX=3702 GN=At2g23790 PE=2 SV=1;	PF04678.14	MCU	Mitochondrial calcium uniporter
gene.CpA0601774.1	5.51333	4.09	23.3933	6.20333	8.23667	5.76333	GO:0030154;GO:0099402;GO:0006508;GO:0042761;GO:0005829;GO:0003755;GO:001692	BP:cell differentiation;BP:plant organ development;BP:proteolysis;BP:very long-chain fatty acid biosynthetic process;CC:cytosol;MF:peptidyl-prolyl cis-trans isomerase activity;MF:pyroglutamyl-peptidase activity;	K01304	pcp	------	------	COG2039	O:Posttranslational modification, protein turnover, chaperones	XP_034574952.1	pyrrolidone-carboxylate peptidase-like [Setaria viridis]	sp|O73944|PCP_PYRFU;	Pyrrolidone-carboxylate peptidase OS=Pyrococcus furiosus;	PF01470.18	Peptidase_C15	Pyroglutamyl peptidase
gene.CpA0603379.1	0.75	1.95667	24.78	11.59	4.61333	0.113333	GO:0009226;GO:0042351;GO:0050662;GO:0016853;GO:0050577;GO:001649	BP:nucleotide-sugar biosynthetic process;BP:'de novo' GDP-L-fucose biosynthetic process;MF:coenzyme binding;MF:isomerase activity;MF:GDP-L-fucose synthase activity;MF:oxidoreductase activity;	K02377	TSTA3, fcl	map00520;map00051	Amino sugar and nucleotide sugar metabolism;Fructose and mannose metabolism	COG0451	C:Energy production and conversion	XP_004965704.1	putative GDP-L-fucose synthase 2 [Setaria italica]	sp|Q67WR5|FCL2_ORYSJ;	Putative GDP-L-fucose synthase 2 OS=Oryza sativa subsp. japonica OX=39947 GN=Os06g0652300 PE=3 SV=1;	PF01370.22;PF16363.6;PF04321.18	Epimerase;GDP_Man_Dehyd;RmlD_sub_bind	NAD dependent epimerase/dehydratase family;GDP-mannose 4,6 dehydratase;RmlD substrate binding domain
gene.CpA0702905.1	1.14667	2.82333	17.5333	4.40667	5.25	0.05	GO:0008643;GO:0016021;GO:0005886;GO:005111	BP:carbohydrate transport;CC:integral component of membrane;CC:plasma membrane;MF:sugar transmembrane transporter activity;	K15382	SLC50A, SWEET	------	------	ENOG4111M4R	U:Intracellular trafficking, secretion, and vesicular transport	XP_004967517.1	bidirectional sugar transporter SWEET17 [Setaria italica]	sp|Q84WN3|SWT17_ARATH;	Bidirectional sugar transporter SWEET17 OS=Arabidopsis thaliana OX=3702 GN=SWEET17 PE=1 SV=2;	PF03083.17	MtN3_slv	Sugar efflux transporter for intercellular exchange
gene.CpA0702908.1	11.5567	7.03333	74.51	23.6533	29.07	13.72	GO:0005737;GO:0005739;GO:0016407;GO:0016746;GO:003140	CC:cytoplasm;CC:mitochondrion;MF:acetyltransferase activity;MF:transferase activity, transferring acyl groups;MF:lipoic acid binding;	K09699	DBT, bkdB	map00280;map00640	Valine, leucine and isoleucine degradation;Propanoate metabolism	COG0508	C:Energy production and conversion	XP_034596589.1	lipoamide acyltransferase component of branched-chain alpha-keto acid dehydrogenase complex, mitochondrial [Setaria viridis]	sp|Q9M7Z1|ODB2_ARATH;	Lipoamide acyltransferase component of branched-chain alpha-keto acid dehydrogenase complex, mitochondrial OS=Arabidopsis thaliana OX=3702 GN=BCE2 PE=1 SV=1;	PF00198.24;PF00364.23;PF02817.18	2-oxoacid_dh;Biotin_lipoyl;E3_binding	2-oxoacid dehydrogenases acyltransferase;Biotin-requiring enzyme;e3 binding domain
gene.CpA0703361.1	21.6967	11.7333	117.967	24.4467	23.5467	22.0367	GO:0006635;GO:0003985;GO:0016747;GO:000398	BP:fatty acid beta-oxidation;MF:acetyl-CoA C-acetyltransferase activity;MF:transferase activity, transferring acyl groups other than amino-acyl groups;MF:acetyl-CoA C-acyltransferase activity;	K00626	E2.3.1.9, atoB	map00630;map00310;map00640;map00650;map00620;map00900;map00072;map00071;map00280;map00380	Glyoxylate and dicarboxylate metabolism;Lysine degradation;Propanoate metabolism;Butanoate metabolism;Pyruvate metabolism;Terpenoid backbone biosynthesis;Synthesis and degradation of ketone bodies;Fatty acid degradation;Valine, leucine and isoleucine degradation;Tryptophan metabolism	COG0183	S:Function unknown	XP_004967971.1	acetyl-CoA acetyltransferase, cytosolic 1 isoform X2 [Setaria italica]	sp|Q8S4Y1|THIC1_ARATH;	Acetyl-CoA acetyltransferase, cytosolic 1 OS=Arabidopsis thaliana OX=3702 GN=AAT1 PE=1 SV=1;	PF00108.24;PF02803.19;PF00109.27	Thiolase_N;Thiolase_C;ketoacyl-synt	Thiolase, N-terminal domain;Thiolase, C-terminal domain;Beta-ketoacyl synthase, N-terminal domain
gene.CpB0102523.1	0.256667	0.17	25.66	2.15667	0.913333	0.713333	GO:0034440;GO:0031408;GO:0046872;GO:001670	BP:lipid oxidation;BP:oxylipin biosynthetic process;MF:metal ion binding;MF:oxidoreductase activity, acting on single donors with incorporation of molecular oxygen, incorporation of two atoms of oxygen;	K00454	LOX2S	map00591;map00592	Linoleic acid metabolism;alpha-Linolenic acid metabolism	ENOG410YN4N	S:Function unknown	XP_004973870.1	probable lipoxygenase 8, chloroplastic [Setaria italica]	sp|Q84YK8|LOXC2_ORYSJ;	Probable lipoxygenase 8, chloroplastic OS=Oryza sativa subsp. japonica OX=39947 GN=CM-LOX2 PE=2 SV=1;	PF00305.20	Lipoxygenase	Lipoxygenase
gene.CpB0102879.1	9.59	19.1033	88.7133	21.3567	19.5333	20.8867	GO:0009056;GO:001678	BP:catabolic process;MF:hydrolase activity;	------	------	------	------	COG0657	I:Lipid transport and metabolism	XP_034599371.1	probable carboxylesterase 8 [Setaria viridis]	sp|Q0ZPV7|CXE1_ACTER;	Carboxylesterase 1 OS=Actinidia eriantha OX=165200 GN=CXE1 PE=1 SV=1;	PF07859.14;PF00135.29	Abhydrolase_3;COesterase	alpha/beta hydrolase fold;Carboxylesterase family
gene.CpB0104138.1	0.066667	1.19	16.4767	5.03667	1.59333	0.2	GO:0006520;GO:0016831;GO:003017	BP:cellular amino acid metabolic process;MF:carboxy-lyase activity;MF:pyridoxal phosphate binding;	------	------	------	------	COG0076	S:Function unknown	XP_012700116.1	tyrosine decarboxylase 1 [Setaria italica]	sp|Q94EE9|TYDC_ORYSJ;	Tyrosine decarboxylase OS=Oryza sativa subsp. japonica OX=39947 GN=TYDC PE=1 SV=1;	PF00282.20	Pyridoxal_deC	Pyridoxal-dependent decarboxylase conserved domain
gene.CpB0201645.1	7.52667	5.31333	53.8267	14.46	18.4267	8.07	GO:0005737;GO:0005739;GO:0016407;GO:0016746;GO:003140	CC:cytoplasm;CC:mitochondrion;MF:acetyltransferase activity;MF:transferase activity, transferring acyl groups;MF:lipoic acid binding;	K09699	DBT, bkdB	map00280;map00640	Valine, leucine and isoleucine degradation;Propanoate metabolism	COG0508	S:Function unknown	XP_034596589.1	lipoamide acyltransferase component of branched-chain alpha-keto acid dehydrogenase complex, mitochondrial [Setaria viridis]	sp|Q9M7Z1|ODB2_ARATH;	Lipoamide acyltransferase component of branched-chain alpha-keto acid dehydrogenase complex, mitochondrial OS=Arabidopsis thaliana OX=3702 GN=BCE2 PE=1 SV=1;	PF00198.24;PF00364.23;PF02817.18	2-oxoacid_dh;Biotin_lipoyl;E3_binding	2-oxoacid dehydrogenases acyltransferase;Biotin-requiring enzyme;e3 binding domain
gene.CpB0202654.1	1.00667	0.71	17.0967	2.1	1.9	1.19	GO:0006839;GO:1990542;GO:0016021;GO:0031966;GO:001707	BP:mitochondrial transport;BP:mitochondrial transmembrane transport;CC:integral component of membrane;CC:mitochondrial membrane;MF:oxidative phosphorylation uncoupler activity;	K15103	UCP2_3, SLC25A8_9	------	------	ENOG410XRV1	O:Posttranslational modification, protein turnover, chaperones	XP_004980093.1	mitochondrial uncoupling protein 1 [Setaria italica]	sp|O81845|PUMP1_ARATH;	Mitochondrial uncoupling protein 1 OS=Arabidopsis thaliana OX=3702 GN=PUMP1 PE=1 SV=1;	PF00153.28	Mito_carr	Mitochondrial carrier protein
gene.CpB0205425.1	55.9367	41.2367	245.803	110.28	97.0133	30.6733	GO:000843	MF:selenium binding;	K17285	SELENBP1	map00920	Sulfur metabolism	ENOG410XP4F	S:Function unknown	XP_004971047.1	selenium-binding protein 1 [Setaria italica]	sp|O23264|SEBP1_ARATH;	Selenium-binding protein 1 OS=Arabidopsis thaliana OX=3702 GN=SBP1 PE=1 SV=1;	PF05694.12	SBP56	56kDa selenium binding protein
gene.CpB0301112.1	9.63667	8.78333	40.6167	14.7233	16.99	12.0967	GO:0006152;GO:0008152;GO:0005829;GO:0016787;GO:0016798;GO:0008477;GO:004687	BP:purine nucleoside catabolic process;BP:metabolic process;CC:cytosol;MF:hydrolase activity;MF:hydrolase activity, acting on glycosyl bonds;MF:purine nucleosidase activity;MF:metal ion binding;	K01240	URH1	map00240;map00760	Pyrimidine metabolism;Nicotinate and nicotinamide metabolism	COG1957	F:Nucleotide transport and metabolism	XP_004956207.1	probable uridine nucleosidase 2 [Setaria italica]	sp|Q652Q8|URH2_ORYSJ;	Probable uridine nucleosidase 2 OS=Oryza sativa subsp. japonica OX=39947 GN=URH2 PE=2 SV=1;	PF01156.20	IU_nuc_hydro	Inosine-uridine preferring nucleoside hydrolase
gene.CpB0301789.1	0.71	0.78	9.17667	3.59333	3.15667	1.21667	GO:0032259;GO:0008168;GO:001649	BP:methylation;MF:methyltransferase activity;MF:oxidoreductase activity;	K00574	cfa	------	------	COG2230	M:Cell wall/membrane/envelope biogenesis	XP_004957293.1	uncharacterized protein LOC101772901 isoform X1 [Setaria italica]	sp|O53732|UFAA1_MYCTU;	Tuberculostearic acid methyltransferase UfaA1 OS=Mycobacterium tuberculosis;	PF02353.21;PF13649.7;PF01593.25;PF08241.13;PF13847.7;PF08242.13;PF05175.15;PF13489.7;PF05401.12;PF12847.8;PF13450.7	CMAS;Methyltransf_25;Amino_oxidase;Methyltransf_11;Methyltransf_31;Methyltransf_12;MTS;Methyltransf_23;NodS;Methyltransf_18;NAD_binding_8	Mycolic acid cyclopropane synthetase;Methyltransferase domain;Flavin containing amine oxidoreductase;Methyltransferase domain;Methyltransferase domain;Methyltransferase domain;Methyltransferase small domain;Methyltransferase domain;Nodulation protein S;Methyltransferase domain;NA
gene.CpB0402885.1	0.18	0.876667	49.6233	0.353333	7.57333	0.076667	GO:0042546;GO:0071555;GO:0010411;GO:0005618;GO:0048046;GO:0016762;GO:000455	BP:cell wall biogenesis;BP:cell wall organization;BP:xyloglucan metabolic process;CC:cell wall;CC:apoplast;MF:xylogluca;MF:hydrolase activity, hydrolyzing O-glycosyl compounds;	K08235	E2.4.1.207	------	------	ENOG411167N	G:Carbohydrate transport and metabolism	XP_034576350.1	xyloglucan endotransglucosylase/hydrolase protein 31-like [Setaria viridis]	sp|P93046|XTH31_ARATH;	Xyloglucan endotransglucosylase/hydrolase protein 31 OS=Arabidopsis thaliana OX=3702 GN=XTH31 PE=1 SV=2;	PF00722.22	Glyco_hydro_16	Glycosyl hydrolases family 16
gene.CpB0403455.1	0.286667	0.663333	16.3667	2.35667	1.03667	1.01667	GO:0009956;GO:0009554;GO:0010305;GO:0009933;GO:0009934;GO:0010015;GO:0016021;GO:0005886;GO:000950	BP:radial pattern formation;BP:megasporogenesis;BP:leaf vascular tissue pattern formation;BP:meristem structural organization;BP:regulation of meristem structural organization;BP:root morphogenesis;CC:integral component of membrane;CC:plasma membrane;CC:plasmodesma;	------	------	------	------	ENOG410YAS0	S:Function unknown	XP_004986107.1	protein TORNADO 2 [Setaria italica]	sp|Q9FIQ5|TRN2_ARATH;	Protein TORNADO 2 OS=Arabidopsis thaliana OX=3702 GN=TRN2 PE=1 SV=1;	PF00335.21	Tetraspanin	Tetraspanin family
gene.CpB0600438.1	0.723333	0.876667	3.31333	0.866667	1.60667	0.336667	GO:0043231;GO:0016758;GO:000819	CC:intracellular membrane-bounded organelle;MF:transferase activity, transferring hexosyl groups;MF:UDP-glycosyltransferase activity;	K08237	E2.4.1.218	------	------	COG1819	S:Function unknown	XP_004954716.1	UDP-glycosyltransferase 72B1 [Setaria italica]	sp|Q9M156|U72B1_ARATH;	UDP-glycosyltransferase 72B1 OS=Arabidopsis thaliana OX=3702 GN=UGT72B1 PE=1 SV=1;	PF00201.19	UDPGT	UDP-glucoronosyl and UDP-glucosyl transferase
gene.CpB0601038.1	0.206667	1.17667	35.7833	2.18	2.71667	0	------	------	------	------	------	------	ENOG41103NC	S:Function unknown	XP_034571683.1	uncharacterized protein LOC117836383 [Setaria viridis]	sp|Q10P60|HS26P_ORYSJ;	26.7 kDa heat shock protein, chloroplastic OS=Oryza sativa subsp. japonica OX=39947 GN=HSP26.7 PE=2 SV=1;	PF00011.22	HSP20	Hsp20/alpha crystallin family

## Sheet: yellow
Gene_id	R_SL	R_D	R_CK	L_SL	L_D	L_CK	GO_id	GO_term	KO_id	KO_name	Pathway_id	Pathway_definition	COG_id	COG_Functional Categories	NR_hit-name	NR_description	Swiss-Prot_hit-name	Swiss-Prot_description	Pfam_id	Domain	Domain description
gene.CpA0101780.1	0.583333	2.08333	2.76667	2.87	31.6133	16.5067	GO:0006281;GO:0006364;GO:0005634;GO:0004386;GO:0003724;GO:0003723;GO:0003676;GO:000552	BP:DNA repair;BP:rRNA processing;CC:nucleus;MF:helicase activity;MF:RNA helicase activity;MF:RNA binding;MF:nucleic acid binding;MF:ATP binding;	------	------	------	------	ENOG410XQS8	S:Function unknown	XP_034568253.1	ATP-dependent DNA helicase At3g02060, chloroplastic [Setaria viridis]	sp|F4JFJ3|Y3206_ARATH;	ATP-dependent DNA helicase At3g02060, chloroplastic OS=Arabidopsis thaliana OX=3702 GN=At3g02060 PE=2 SV=1;	PF00271.32;PF00270.30;PF02559.17;PF04851.16;PF03461.16	Helicase_C;DEAD;CarD_CdnL_TRCF;ResIII;TRCF	Helicase conserved C-terminal domain;DEAD/DEAH box helicase;CarD-like/TRCF domain;Type III restriction enzyme, res subunit;TRCF domain
gene.CpA0102457.1	0.14	0.133333	0.293333	1.65333	33.2267	18.3567	GO:0006952;GO:0045454;GO:0009657;GO:0009579;GO:0005623;GO:0042644;GO:0047134;GO:0015036;GO:001503	BP:defense response;BP:cell redox homeostasis;BP:plastid organization;CC:thylakoid;CC:cell;CC:chloroplast nucleoid;MF:protein-disulfide reductase activity;MF:disulfide oxidoreductase activity;MF:protein disulfide oxidoreductase activity;	------	------	------	------	COG3118;COG0526	O:Posttranslational modification, protein turnover, chaperones;	XP_034598950.1	thioredoxin-like protein CITRX, chloroplastic [Setaria viridis]	sp|A2YUQ6|CITRX_ORYSI;	Thioredoxin-like protein CITRX, chloroplastic OS=Oryza sativa subsp. indica OX=39946 GN=OsI_29059 PE=3 SV=1;	PF00085.21;PF13098.7;PF13899.7;PF04756.14	Thioredoxin;Thioredoxin_2;Thioredoxin_7;OST3_OST6	Thioredoxin;Thioredoxin-like domain;Thioredoxin-like;OST3 / OST6 family, transporter family
gene.CpA0103046.1	2.28	3.96333	4.8	5.56	76.53	52.1333	GO:0009658;GO:0006355;GO:0009570;GO:000425	BP:chloroplast organization;BP:regulation of transcription, DNA-templated;CC:chloroplast stroma;MF:serine-type endopeptidase activity;	------	------	------	------	ENOG410YAAY	S:Function unknown	PUZ65971.1	hypothetical protein GQ55_3G268500 [Panicum hallii var. hallii]	sp|Q0DI48|MRL7L_ORYSJ;	Thioredoxin-like fold domain-containing protein MRL7L homolog, chloroplastic OS=Oryza sativa subsp. japonica OX=39947 GN=MRL7L PE=2 SV=1;	------	------	------
gene.CpA0104111.1	0.056667	0.096667	0.063333	2.04	72.8067	63.0233	GO:0006352;GO:0016021;GO:0009507;GO:0003700;GO:0016987;GO:000367	BP:DNA-templated transcription, initiation;CC:integral component of membrane;CC:chloroplast;MF:transcription factor activity, sequence-specific DNA binding;MF:sigma factor activity;MF:DNA binding;	K03093	sigI	------	------	COG0568	S:Function unknown	XP_012699750.1	RNA polymerase sigma factor sigC [Setaria italica]	sp|O24621|SIGC_ARATH;	RNA polymerase sigma factor sigC OS=Arabidopsis thaliana OX=3702 GN=SIGC PE=2 SV=1;	PF04545.17;PF04539.17;PF04542.15	Sigma70_r4;Sigma70_r3;Sigma70_r2	Sigma-70, region 4;Sigma-70 region 3;Sigma-70 region 2
gene.CpA0200563.1	0.24	0.936667	0.36	1.78333	64.79	21.6267	GO:0018105;GO:0035556;GO:0046777;GO:0005737;GO:0005634;GO:0009931;GO:0005516;GO:0004672;GO:000552	BP:peptidyl-serine phosphorylation;BP:intracellular signal transduction;BP:protein autophosphorylation;CC:cytoplasm;CC:nucleus;MF:calcium-dependent protein serine/threonine kinase activity;MF:calmodulin binding;MF:protein kinase activity;MF:ATP binding;	------	------	------	------	ENOG410XRMJ	U:Intracellular trafficking, secretion, and vesicular transport	XP_025802433.1	CDPK-related kinase 5-like [Panicum hallii]	sp|Q9SCS2|CAMK5_ARATH;	CDPK-related kinase 5 OS=Arabidopsis thaliana OX=3702 GN=CRK5 PE=2 SV=1;	PF00069.26;PF07714.18;PF06293.15;PF14531.7	Pkinase;PK_Tyr_Ser-Thr;Kdo;Kinase-like	Protein kinase domain;Protein tyrosine and serine/threonine kinase;Lipopolysaccharide kinase;Kinase-like
gene.CpA0201982.1	0.873333	0.8	1.44333	2.10333	16.5667	12.56	GO:004278	MF:3'-tRNA processing endoribonuclease activity;	K00784	rnz	map03013	RNA transport	COG1234	S:Function unknown	XP_002462556.2	tRNase Z TRZ2, chloroplastic [Sorghum bicolor]	sp|Q8L633|RNZ2_ARATH;	tRNase Z TRZ2, chloroplastic OS=Arabidopsis thaliana OX=3702 GN=TRZ2 PE=2 SV=1;	PF12706.8;PF00753.28	Lactamase_B_2;Lactamase_B	Beta-lactamase superfamily domain;Metallo-beta-lactamase superfamily
gene.CpA0204194.1	0.08	0.206667	0.193333	0.8	7.14	4.88333	GO:0032502;GO:0009658;GO:0006355;GO:0009506;GO:0009507;GO:000369	BP:developmental process;BP:chloroplast organization;BP:regulation of transcription, DNA-templated;CC:plasmodesma;CC:chloroplast;MF:double-stranded DNA binding;	K15032	MTERFD	------	------	ENOG410XT49	S:Function unknown	RLN35606.1	uncharacterized protein C2845_PM03G19490 [Panicum miliaceum]	sp|F4IHL3|MTEF2_ARATH;	Transcription termination factor MTERF2, chloroplastic OS=Arabidopsis thaliana OX=3702 GN=MTERF2 PE=3 SV=1;	PF02536.15	mTERF	mTERF
gene.CpA0302673.1	0.683333	1.89667	2.29667	2.63	99.08	37.5133	GO:0016554;GO:1900865;GO:0009941;GO:0009570;GO:0005739;GO:0009507;GO:004280	BP:cytidine to uridine editing;BP:chloroplast RNA modification;CC:chloroplast envelope;CC:chloroplast stroma;CC:mitochondrion;CC:chloroplast;MF:protein homodimerization activity;	------	------	------	------	ENOG410YD5Z	S:Function unknown	XP_004972887.1	multiple organellar RNA editing factor 9, chloroplastic [Setaria italica]	sp|Q9LPZ1|MORF9_ARATH;	Multiple organellar RNA editing factor 9, chloroplastic OS=Arabidopsis thaliana OX=3702 GN=MORF9 PE=1 SV=1;	------	------	------
gene.CpA0400071.1	0	0.016667	0	2.75	141.113	120.953	GO:0016020;GO:0016021;GO:0004497;GO:0020037;GO:0016709;GO:0016705;GO:000550	CC:membrane;CC:integral component of membrane;MF:monooxygenase activity;MF:heme binding;MF:oxidoreductase activity, acting on paired donors, with incorporation or reduction of molecular oxygen, NA;MF:oxidoreductase activity, acting on paired donors, with incorporation or reduction of molecular oxygen;MF:iron ion binding;	K00512	CYP17A	------	------	COG2124	S:Function unknown	XP_025798311.1	cytochrome P450 89A2-like [Panicum hallii]	sp|Q9SRQ1|C89A9_ARATH;	Cytochrome P450 89A9 OS=Arabidopsis thaliana OX=3702 GN=CYP89A9 PE=2 SV=1;	PF00067.23	p450	Cytochrome P450
gene.CpA0403429.1	0.18	0.26	0.223333	0.92	15.6067	6.76	------	------	------	------	------	------	ENOG410XTIN	S:Function unknown	XP_034573806.1	uncharacterized protein LOC117838046 isoform X2 [Setaria viridis]	------	------	PF17177.5;PF02037.28;PF13041.7	PPR_long;SAP;PPR_2	Pentacotripeptide-repeat region of PRORP;SAP domain;PPR repeat family
gene.CpA0403713.1	0.033333	0.573333	0.453333	2.46	100.237	91.9967	GO:0003824;GO:001678	MF:catalytic activity;MF:hydrolase activity;	------	------	------	------	COG0596;ENOG410XPRR;ENOG410XRPK	S:Function unknown;	XP_034572977.1	AB hydrolase superfamily protein YfhM-like [Setaria viridis]	sp|P34913|HYES_HUMAN;	Bifunctional epoxide hydrolase 2 OS=Homo sapiens OX=9606 GN=EPHX2 PE=1 SV=2;	PF00561.21;PF12697.8;PF12146.9	Abhydrolase_1;Abhydrolase_6;Hydrolase_4	alpha/beta hydrolase fold;Alpha/beta hydrolase family;Serine aminopeptidase, S33
gene.CpA0404403.1	0.09	2.09333	1.97667	0.703333	153.387	76.8833	GO:0009228;GO:0010266;GO:0009570;GO:0051536;GO:0016830;GO:001990	BP:thiamine biosynthetic process;BP:response to vitamin B1;CC:chloroplast stroma;MF:iron-sulfur cluster binding;MF:carbon-carbon lyase activity;MF:protein domain specific binding;	K03147	thiC	map00730	Thiamine metabolism	COG0422	H:Coenzyme transport and metabolism	XP_034572863.1	phosphomethylpyrimidine synthase, chloroplastic [Setaria viridis]	sp|O82392|THIC_ARATH;	Phosphomethylpyrimidine synthase, chloroplastic OS=Arabidopsis thaliana OX=3702 GN=THIC PE=1 SV=1;	PF01964.19;PF13667.7	ThiC_Rad_SAM;ThiC-associated	Radical SAM ThiC family;ThiC-associated domain
gene.CpA0500325.1	1.26667	1.12	1.44	1.92	23.2	12.0967	GO:0006355;GO:004264	BP:regulation of transcription, DNA-templated;CC:chloroplast nucleoid;	------	------	------	------	ENOG410Y289	S:Function unknown	XP_004960143.1	protein PEP-RELATED DEVELOPMENT ARRESTED 1 homolog, chloroplastic [Setaria italica]	sp|Q53K52|PRDA1_ORYSJ;	Protein PEP-RELATED DEVELOPMENT ARRESTED 1 homolog, chloroplastic OS=Oryza sativa subsp. japonica OX=39947 GN=Os11g0425300 PE=2 SV=1;	------	------	------
gene.CpA0505064.1	0.603333	1.03667	2.12667	2.22667	13.1867	11.8933	GO:000635	BP:DNA-templated transcription, termination;	------	------	------	------	ENOG410YIZQ	S:Function unknown	XP_004954296.1	SAP-like protein BP-73 [Setaria italica]	sp|Q8L4E7|BP73_ORYSJ;	SAP-like protein BP-73 OS=Oryza sativa subsp. japonica OX=39947 GN=BP-73 PE=1 SV=1;	PF07498.13;PF02037.28;PF12949.8	Rho_N;SAP;HeH	Rho termination factor, N-terminal domain;SAP domain;HeH/LEM domain
gene.CpA0600039.1	0.39	0.423333	0.736667	2.34667	66.0033	40.95	------	------	------	------	------	------	ENOG4111NY8	S:Function unknown	XP_004986025.1	uncharacterized protein LOC101783922 isoform X2 [Setaria italica]	------	------	PF07876.13	Dabb	Stress responsive A/B Barrel Domain
gene.CpA0601410.1	5.11333	9.45667	11.82	10.1133	73.2733	49.5667	GO:0006515;GO:0009534;GO:0009840;GO:0009941;GO:0009368;GO:0004176;GO:0004252;GO:005111	BP:misfolded or incompletely synthesized protein catabolic process;CC:chloroplast thylakoid;CC:chloroplastic endopeptidase Clp complex;CC:chloroplast envelope;CC:endopeptidase Clp complex;MF:ATP-dependent peptidase activity;MF:serine-type endopeptidase activity;MF:ATPase binding;	K01358	clpP, CLPP	------	------	COG0740	S:Function unknown	PUZ41390.1	hypothetical protein GQ55_9G501300 [Panicum hallii var. hallii]	sp|Q9S834|CLPP5_ARATH;	ATP-dependent Clp protease proteolytic subunit 5, chloroplastic OS=Arabidopsis thaliana OX=3702 GN=CLPP5 PE=1 SV=1;	PF00574.24	CLP_protease	Clp protease
gene.CpA0602076.1	0.166667	0.223333	0.236667	0.613333	9.00667	7.01333	------	------	------	------	------	------	ENOG410Z7Z7	S:Function unknown	OQU92373.1	hypothetical protein SORBI_3001G333000 [Sorghum bicolor]	sp|Q9SZ52|PP344_ARATH;	Pentatricopeptide repeat-containing protein At4g31850, chloroplastic OS=Arabidopsis thaliana OX=3702 GN=PGR3 PE=1 SV=1;	PF13041.7;PF12854.8;PF01535.21;PF13812.7;PF17177.5;PF12921.8	PPR_2;PPR_1;PPR;PPR_3;PPR_long;ATP13	PPR repeat family;PPR repeat;PPR repeat;Pentatricopeptide repeat domain;Pentacotripeptide-repeat region of PRORP;Mitochondrial ATPase expression
gene.CpA0701608.1	1.39333	3.9	3.87333	2.78	51.25	29.2	------	------	------	------	------	------	ENOG4111QZ6	S:Function unknown	XP_004970013.1	pentatricopeptide repeat-containing protein At4g21190 isoform X1 [Setaria italica]	sp|Q8LG95|PP332_ARATH;	Pentatricopeptide repeat-containing protein At4g21190 OS=Arabidopsis thaliana OX=3702 GN=EMB1417 PE=2 SV=1;	PF13041.7	PPR_2	PPR repeat family
gene.CpA0702245.1	0.186667	0.936667	0.313333	0.876667	54.75	46.2833	------	------	------	------	------	------	ENOG4110UK9	S:Function unknown	XP_034593406.1	uncharacterized protein LOC117855213 [Setaria viridis]	------	------	PF00300.23	His_Phos_1	Histidine phosphatase superfamily
gene.CpB0101386.1	1.22333	2.35667	2.94333	4.36667	95.1833	37.3467	GO:0016554;GO:1900865;GO:0009941;GO:0009570;GO:0005739;GO:0009507;GO:004280	BP:cytidine to uridine editing;BP:chloroplast RNA modification;CC:chloroplast envelope;CC:chloroplast stroma;CC:mitochondrion;CC:chloroplast;MF:protein homodimerization activity;	------	------	------	------	ENOG410YD5Z	S:Function unknown	XP_004972887.1	multiple organellar RNA editing factor 9, chloroplastic [Setaria italica]	sp|Q9LPZ1|MORF9_ARATH;	Multiple organellar RNA editing factor 9, chloroplastic OS=Arabidopsis thaliana OX=3702 GN=MORF9 PE=1 SV=1;	PF03358.16;PF02525.18	FMN_red;Flavodoxin_2	NADPH-dependent FMN reductase;Flavodoxin-like fold
gene.CpB0102390.1	4.59333	7.48	7.84	10.2967	53.3067	29.71	GO:0006457;GO:0010157;GO:0009704;GO:0009414;GO:0009651;GO:0009408;GO:0045037;GO:0009941;GO:0009570;GO:0005774;GO:0005739;GO:0051082;GO:0005524;GO:004280	BP:protein folding;BP:response to chlorate;BP:de-etiolation;BP:response to water deprivation;BP:response to salt stress;BP:response to heat;BP:protein import into chloroplast stroma;CC:chloroplast envelope;CC:chloroplast stroma;CC:vacuolar membrane;CC:mitochondrion;MF:unfolded protein binding;MF:ATP binding;MF:protein homodimerization activity;	K09487	HSP90B, TRA1	map04626;map04141	Plant-pathogen interaction;Protein processing in endoplasmic reticulum	COG0326	O:Posttranslational modification, protein turnover, chaperones	XP_004973760.1	heat shock protein 90-5, chloroplastic [Setaria italica]	sp|Q9SIF2|HS905_ARATH;	Heat shock protein 90-5, chloroplastic OS=Arabidopsis thaliana OX=3702 GN=HSP90-5 PE=1 SV=1;	PF00183.19;PF02518.27;PF13589.7	HSP90;HATPase_c;HATPase_c_3	Hsp90 protein;Histidine kinase-, DNA gyrase B-, and HSP90-like ATPase;Histidine kinase-, DNA gyrase B-, and HSP90-like ATPase
gene.CpB0103479.1	2.29667	2.31333	4.1	4.47333	36.6833	34.4033	GO:0071482;GO:0048366;GO:0009965;GO:0042254;GO:0009658;GO:0010239;GO:0009537;GO:0009509;GO:0009501;GO:0042644;GO:0009513;GO:0009507;GO:0019843;GO:004362	BP:cellular response to light stimulus;BP:leaf development;BP:leaf morphogenesis;BP:ribosome biogenesis;BP:chloroplast organization;BP:chloroplast mRNA processing;CC:proplastid;CC:chromoplast;CC:amyloplast;CC:chloroplast nucleoid;CC:etioplast;CC:chloroplast;MF:rRNA binding;MF:protein self-association;	------	------	------	------	ENOG4111FTZ	S:Function unknown	XP_004962176.1	protein PALE CRESS, chloroplastic [Setaria italica]	sp|Q39089|PAC_ARATH;	Protein PALE CRESS, chloroplastic OS=Arabidopsis thaliana OX=3702 GN=PAC PE=2 SV=1;	------	------	------
gene.CpB0104680.1	0	0.07	0.096667	3.77	125.143	117.72	GO:0006352;GO:0016021;GO:0009507;GO:0003700;GO:0016987;GO:000367	BP:DNA-templated transcription, initiation;CC:integral component of membrane;CC:chloroplast;MF:transcription factor activity, sequence-specific DNA binding;MF:sigma factor activity;MF:DNA binding;	K03093	sigI	------	------	COG0568	K:Transcription	XP_012699750.1	RNA polymerase sigma factor sigC [Setaria italica]	sp|O24621|SIGC_ARATH;	RNA polymerase sigma factor sigC OS=Arabidopsis thaliana OX=3702 GN=SIGC PE=2 SV=1;	PF04545.17;PF04539.17;PF04542.15	Sigma70_r4;Sigma70_r3;Sigma70_r2	Sigma-70, region 4;Sigma-70 region 3;Sigma-70 region 2
gene.CpB0203443.1	0.186667	0.323333	0.463333	1.22667	70.8433	27.25	GO:0009507;GO:0004386;GO:0003724;GO:0003723;GO:0003676;GO:000552	CC:chloroplast;MF:helicase activity;MF:RNA helicase activity;MF:RNA binding;MF:nucleic acid binding;MF:ATP binding;	K17679	MSS116	------	------	COG0513	S:Function unknown	XP_034597100.1	DEAD-box ATP-dependent RNA helicase 25-like [Setaria viridis]	sp|Q5ZBH5|RH25_ORYSJ;	DEAD-box ATP-dependent RNA helicase 25 OS=Oryza sativa subsp. japonica OX=39947 GN=Os01g0618400 PE=2 SV=1;	PF00270.30;PF00271.32;PF04851.16	DEAD;Helicase_C;ResIII	DEAD/DEAH box helicase;Helicase conserved C-terminal domain;Type III restriction enzyme, res subunit
gene.CpB0203979.1	0	0.463333	0.3	0.153333	36.9167	33.0533	GO:0016567;GO:0005634;GO:0030891;GO:000451	BP:protein ubiquitination;CC:nucleus;CC:VCB complex;MF:nuclease activity;	------	------	------	------	ENOG410YEHB	S:Function unknown	XP_004969664.1	bifunctional nuclease [Setaria italica]	sp|Q09LL3|BBD_ORYMI;	Bifunctional nuclease OS=Oryza minuta OX=63629 GN=BBD PE=2 SV=1;	PF02577.15	DUF151	Domain of unknown function
gene.CpB0204691.1	0.306667	0.92	1.26	0.496667	38.4033	21.12	GO:0030422;GO:0042254;GO:0031053;GO:0031054;GO:0000373;GO:0006396;GO:0006397;GO:0005634;GO:0009570;GO:0004525;GO:0003727;GO:000372	BP:production of siRNA involved in RNA interference;BP:ribosome biogenesis;BP:primary miRNA processing;BP:pre-miRNA processing;BP:Group II intron splicing;BP:RNA processing;BP:mRNA processing;CC:nucleus;CC:chloroplast stroma;MF:ribonuclease III activity;MF:single-stranded RNA binding;MF:double-stranded RNA binding;	------	------	------	------	ENOG4110321	S:Function unknown	XP_004970308.1	ribonuclease III domain-containing protein RNC1, chloroplastic [Setaria italica]	sp|A6YSL1|RNC1_MAIZE;	Ribonuclease III domain-containing protein RNC1, chloroplastic OS=Zea mays OX=4577 GN=RNC1 PE=1 SV=1;	PF14622.7;PF00636.27	Ribonucleas_3_3;Ribonuclease_3	Ribonuclease-III-like;Ribonuclease III domain
gene.CpB0205324.1	0.34	0.803333	0.986667	2.54	35.77	16.2733	GO:0009508;GO:0009507;GO:000367	CC:plastid chromosome;CC:chloroplast;MF:nucleic acid binding;	------	------	------	------	ENOG410XTWN	S:Function unknown	XP_004970953.1	protein PLASTID TRANSCRIPTIONALLY ACTIVE 10 [Setaria italica]	sp|F4JF21|PTA10_ARATH;	Protein PLASTID TRANSCRIPTIONALLY ACTIVE 10 OS=Arabidopsis thaliana OX=3702 GN=PTAC10 PE=1 SV=1;	------	------	------
gene.CpB0501697.1	5.66333	7.73	7.95333	12.3733	82.6133	53.5467	GO:0006515;GO:0009534;GO:0009840;GO:0009941;GO:0009368;GO:0004176;GO:0004252;GO:005111	BP:misfolded or incompletely synthesized protein catabolic process;CC:chloroplast thylakoid;CC:chloroplastic endopeptidase Clp complex;CC:chloroplast envelope;CC:endopeptidase Clp complex;MF:ATP-dependent peptidase activity;MF:serine-type endopeptidase activity;MF:ATPase binding;	K01358	clpP, CLPP	------	------	COG0740	O:Posttranslational modification, protein turnover, chaperones	PUZ41390.1	hypothetical protein GQ55_9G501300 [Panicum hallii var. hallii]	sp|Q9S834|CLPP5_ARATH;	ATP-dependent Clp protease proteolytic subunit 5, chloroplastic OS=Arabidopsis thaliana OX=3702 GN=CLPP5 PE=1 SV=1;	PF00574.24	CLP_protease	Clp protease
gene.CpB0600947.1	12.3167	18.17	15.53	33.8833	160.743	113.22	GO:0031969;GO:0016021;GO:0005471;GO:000552	CC:chloroplast membrane;CC:integral component of membrane;MF:AT;MF:ATP binding;	K03301	TC.AAA	------	------	COG3202	C:Energy production and conversion	XP_034589006.1	plastidic ATP/ADP-transporter-like [Setaria viridis]	sp|Q39002|TLC1_ARATH;	ADP,ATP carrier protein 1, chloroplastic OS=Arabidopsis thaliana OX=3702 GN=AATP1 PE=1 SV=2;	PF03219.15	TLC	TLC ATP/ADP transporter
gene.CpB0700956.1	0	0.126667	0.103333	1.97	85.0833	43.37	GO:0009658;GO:0006355;GO:0009416;GO:0009408;GO:0042793;GO:0009535;GO:0009941;GO:0000427;GO:0009508;GO:0042644;GO:000375	BP:chloroplast organization;BP:regulation of transcription, DNA-templated;BP:response to light stimulus;BP:response to heat;BP:transcription from plastid promoter;CC:chloroplast thylakoid membrane;CC:chloroplast envelope;CC:plastid-encoded plastid RNA polymerase complex;CC:plastid chromosome;CC:chloroplast nucleoid;MF:protein disulfide isomerase activity;	K22519	PTAC5	------	------	ENOG4111TC7	S:Function unknown	XP_034603229.1	protein disulfide isomerase pTAC5, chloroplastic [Setaria viridis]	sp|A1A6M1|PTAC5_ARATH;	Protein disulfide isomerase pTAC5, chloroplastic OS=Arabidopsis thaliana OX=3702 GN=PTAC5 PE=1 SV=1;	PF01471.19;PF00684.20	PG_binding_1;DnaJ_CXXCXGXG	Putative peptidoglycan binding domain;DnaJ central domain

## Sheet: greenyellow
Gene_id	R_SL	R_D	R_CK	L_SL	L_D	L_CK	GO_id	GO_term	KO_id	KO_name	Pathway_id	Pathway_definition	COG_id	COG_Functional Categories	NR_hit-name	NR_description	Swiss-Prot_hit-name	Swiss-Prot_description	Pfam_id	Domain	Domain description
gene.CpA0100926.1	2.25333	1.35	9.05333	9.22333	2.24333	6.44333	GO:0005829;GO:0004363;GO:0000287;GO:0043295;GO:0005524;GO:004280	CC:cytosol;MF:glutathione synthase activity;MF:magnesium ion binding;MF:glutathione binding;MF:ATP binding;MF:protein homodimerization activity;	K21456	GSS	map00270;map00480	Cysteine and methionine metabolism;Glutathione metabolism	ENOG410XPHH	I:Lipid transport and metabolism	XP_034569445.1	glutathione synthetase, chloroplastic-like [Setaria viridis]	sp|O23732|GSHB_BRAJU;	Glutathione synthetase, chloroplastic OS=Brassica juncea OX=3707 GN=GSH2 PE=2 SV=1;	PF03917.18	GSH_synth_ATP	Eukaryotic glutathione synthase, ATP binding domain
gene.CpA0102214.1	8.09333	7.67	60.3367	20.9467	9.37667	34.5	GO:0006552;GO:1905202;GO:0005739;GO:0050897;GO:0008270;GO:001687	BP:leucine catabolic process;CC:methylcrotonoyl-CoA carboxylase complex;CC:mitochondrion;MF:cobalt ion binding;MF:zinc ion binding;MF:ligase activity;	K01969	E6.4.1.4B	map00280	Valine, leucine and isoleucine degradation	COG4799	I:Lipid transport and metabolism	XP_034599711.1	methylcrotonoyl-CoA carboxylase beta chain, mitochondrial [Setaria viridis]	sp|Q9LDD8|MCCB_ARATH;	Methylcrotonoyl-CoA carboxylase beta chain, mitochondrial OS=Arabidopsis thaliana OX=3702 GN=MCCB PE=2 SV=1;	PF01039.23	Carboxyl_trans	Carboxyl transferase domain
gene.CpA0104053.1	0.08	0	3.45333	2.52	0.52	2.59	GO:001602	CC:integral component of membrane;	------	------	------	------	ENOG410Z77B	S:Function unknown	XP_025808226.1	predicted GPI-anchored protein 58 [Panicum hallii]	------	------	------	------	------
gene.CpA0104368.1	1.14333	1.09	5.05667	1.90667	1.84333	4.93333	------	------	------	------	------	------	ENOG410YV28	S:Function unknown	XP_004977137.1	uncharacterized protein LOC101778331 [Setaria italica]	------	------	PF05097.13	DUF688	Protein of unknown function
gene.CpA0104386.1	36.2067	23.8667	125.867	46.1567	45.0633	64.0067	GO:0005777;GO:0003995;GO:005066	CC:peroxisome;MF:acyl-CoA dehydrogenase activity;MF:flavin adenine dinucleotide binding;	K00232	E1.3.3.6, ACOX1, ACOX3	map00640;map00592;map01040;map00071;map04146;map00410	Propanoate metabolism;alpha-Linolenic acid metabolism;Biosynthesis of unsaturated fatty acids;Fatty acid degradation;Peroxisome;beta-Alanine metabolism	COG1960	I:Lipid transport and metabolism	XP_004977127.1	acyl-coenzyme A oxidase 4, peroxisomal [Setaria italica]	sp|Q96329|ACOX4_ARATH;	Acyl-coenzyme A oxidase 4, peroxisomal OS=Arabidopsis thaliana OX=3702 GN=ACX4 PE=1 SV=1;	PF02771.17;PF00441.25;PF02770.20	Acyl-CoA_dh_N;Acyl-CoA_dh_1;Acyl-CoA_dh_M	Acyl-CoA dehydrogenase, N-terminal domain;Acyl-CoA dehydrogenase, C-terminal domain;Acyl-CoA dehydrogenase, middle domain
gene.CpA0200212.1	2.11	0	45.3667	9.98667	3.69667	76.03	GO:000990	BP:regulation of flower development;	------	------	------	------	ENOG410ZG2J	S:Function unknown	XP_034582304.1	flowering-promoting factor 1-like protein 5 [Setaria viridis]	sp|A3BNA1|FLP5_ORYSJ;	Flowering-promoting factor 1-like protein 5 OS=Oryza sativa subsp. japonica OX=39947 GN=Os07g0671000 PE=3 SV=1;	------	------	------
gene.CpA0201688.1	2.32667	2.09333	9.47	5.49333	4.24333	6.91667	GO:0015937;GO:0005829;GO:0005634;GO:0016787;GO:0046872;GO:0004594;GO:000552	BP:coenzyme A biosynthetic process;CC:cytosol;CC:nucleus;MF:hydrolase activity;MF:metal ion binding;MF:pantothenate kinase activity;MF:ATP binding;	K09680	coaW	map00770	Pantothenate and CoA biosynthesis	COG5146	S:Function unknown	XP_004957459.1	pantothenate kinase 2 [Setaria italica]	sp|Q0J035|PANK2_ORYSJ;	Pantothenate kinase 2 OS=Oryza sativa subsp. japonica OX=39947 GN=Os09g0533100 PE=2 SV=2;	PF03630.15	Fumble	Fumble
gene.CpA0202626.1	1.59667	1.04667	32.17	17.0933	6.46667	14.91	GO:0055085;GO:001602	BP:transmembrane transport;CC:integral component of membrane;	------	------	------	------	COG0679	S:Function unknown	XP_004957210.1	protein PIN-LIKES 3 [Setaria italica]	sp|F4HWB6|PILS1_ARATH;	Protein PIN-LIKES 1 OS=Arabidopsis thaliana OX=3702 GN=PILS1 PE=2 SV=1;	PF03547.19	Mem_trans	Membrane transport protein
gene.CpA0303976.1	2.30667	3.02333	37.47	8.01333	4.74667	15.4667	GO:0046872;GO:0016874;GO:000552	MF:metal ion binding;MF:ligase activity;MF:ATP binding;	K01968	E6.4.1.4A	map00280	Valine, leucine and isoleucine degradation	COG4770	I:Lipid transport and metabolism	XP_004963117.1	methylcrotonoyl-CoA carboxylase subunit alpha, mitochondrial [Setaria italica]	sp|Q2QMG2|MCCA_ORYSJ;	Methylcrotonoyl-CoA carboxylase subunit alpha, mitochondrial OS=Oryza sativa subsp. japonica OX=39947 GN=MCCA PE=2 SV=2;	PF02786.18;PF02785.20;PF00364.23;PF07478.14;PF13533.7	CPSase_L_D2;Biotin_carb_C;Biotin_lipoyl;Dala_Dala_lig_C;Biotin_lipoyl_2	Carbamoyl-phosphate synthase L chain, ATP binding domain;Biotin carboxylase C-terminal domain;Biotin-requiring enzyme;D-ala D-ala ligase C-terminus;Biotin-lipoyl like
gene.CpA0401973.1	2.76	2.40667	18.8767	4.72333	3.81667	12.4433	GO:0045454;GO:0035556;GO:0005623;GO:0016758;GO:0015035;GO:000905	BP:cell redox homeostasis;BP:intracellular signal transduction;CC:cell;MF:transferase activity, transferring hexosyl groups;MF:protein disulfide oxidoreductase activity;MF:electron carrier activity;	------	------	------	------	ENOG410Y2WM	S:Function unknown	XP_034591058.1	uncharacterized protein LOC117852882 [Setaria viridis]	sp|A3LRB2|IML1_PICST;	Vacuolar membrane-associated protein IML1 OS=Scheffersomyces stipitis;	PF04784.15;PF00610.22;PF00462.25	DUF547;DEP;Glutaredoxin	Protein of unknown function, DUF547;Domain found in Dishevelled, Egl-10, and Pleckstrin;Glutaredoxin
gene.CpA0403853.1	3.57333	2.79	20.29	8.51333	5.17333	9.57667	GO:0022904;GO:0031305;GO:0004174;GO:0051539;GO:0043783;GO:0048039;GO:0046872;GO:000905	BP:respiratory electron transport chain;CC:integral component of mitochondrial inner membrane;MF:electron-transferring-flavoprotein dehydrogenase activity;MF:4 iron, 4 sulfur cluster binding;MF:oxidoreductase activity, oxidizing metal ions with flavin as acceptor;MF:ubiquinone binding;MF:metal ion binding;MF:electron carrier activity;	K00311	ETFDH	------	------	COG0644	C:Energy production and conversion	XP_004982609.1	electron transfer flavoprotein-ubiquinone oxidoreductase, mitochondrial isoform X1 [Setaria italica]	sp|Q337B8|ETFQO_ORYSJ;	Electron transfer flavoprotein-ubiquinone oxidoreductase, mitochondrial OS=Oryza sativa subsp. japonica OX=39947 GN=Os10g0516300 PE=3 SV=1;	PF05187.14;PF00890.25;PF13450.7;PF01266.25;PF01946.18;PF07992.15;PF03486.15;PF05834.13;PF13738.7;PF12831.8;PF01494.20;PF13454.7	ETF_QO;FAD_binding_2;NAD_binding_8;DAO;Thi4;Pyr_redox_2;HI0933_like;Lycopene_cycl;Pyr_redox_3;FAD_oxidored;FAD_binding_3;NAD_binding_9	Electron transfer flavoprotein-ubiquinone oxidoreductase, 4Fe-4S;FAD binding domain;NA;FAD dependent oxidoreductase;Thi4 family;Pyridine nucleotide-disulphide oxidoreductase;HI0933-like protein;Lycopene cyclase protein;Pyridine nucleotide-disulphide oxidoreductase;FAD dependent oxidoreductase;FAD binding domain;FAD-NA
gene.CpA0603672.1	3.06667	3.82333	11.55	7.31333	3.19667	13.14	GO:0016567;GO:0006511;GO:0031146;GO:001900	BP:protein ubiquitination;BP:ubiquitin-dependent protein catabolic process;BP:SCF-dependent proteasomal ubiquitin-dependent protein catabolic process;CC:SCF ubiquitin ligase complex;	K14515	EBF1_2	map04016;map04075	MAPK signaling pathway - plant;Plant hormone signal transduction	ENOG410XQ54	S:Function unknown	CAB3470814.1	unnamed protein product [Digitaria exilis]	sp|Q9SKK0|EBF1_ARATH;	EIN3-binding F-box protein 1 OS=Arabidopsis thaliana OX=3702 GN=EBF1 PE=1 SV=1;	PF00646.34	F-box	F-box domain
gene.CpA0603934.1	4.26667	5.16	19.8933	7.45333	8.94333	13.09	------	------	------	------	------	------	ENOG41125VA	S:Function unknown	OEL21921.1	hypothetical protein BAE44_0017060 [Dichanthelium oligosanthes]	------	------	PF08695.11	Coa1	Cytochrome oxidase complex assembly protein 1
gene.CpB0100377.1	3.10667	4.80667	26.6567	12.8733	9.17	10.93	GO:000823	MF:cysteine-type peptidase activity;	K16287	ULP1C_D	------	------	COG5160	O:Posttranslational modification, protein turnover, chaperones	XP_012700325.1	probable ubiquitin-like-specific protease 2B [Setaria italica]	sp|Q8RWN0|ULP1C_ARATH;	Ubiquitin-like-specific protease 1C OS=Arabidopsis thaliana OX=3702 GN=ULP1C PE=1 SV=1;	PF02902.20	Peptidase_C48	Ulp1 protease family, C-terminal catalytic domain
gene.CpB0100922.1	5.52333	9.47333	66.1967	20.0333	19.6233	41.9933	GO:0071705;GO:0016021;GO:0016020;GO:0005274;GO:0022857;GO:001550	BP:nitrogen compound transport;CC:integral component of membrane;CC:membrane;MF:allantoin uptake transmembrane transporter activity;MF:transmembrane transporter activity;MF:uraci;	------	------	------	------	ENOG410YFDW	S:Function unknown	XP_025805681.1	ureide permease 1-like isoform X2 [Panicum hallii]	sp|Q9ZQ89|UPS2_ARATH;	Ureide permease 2 OS=Arabidopsis thaliana OX=3702 GN=UPS2 PE=1 SV=2;	PF07168.12;PF06800.13	Ureide_permease;Sugar_transport	Ureide permease;Sugar transport protein
gene.CpB0102025.1	5.58333	3.56333	65.9367	15.92	8.3	21.85	GO:0006552;GO:1905202;GO:0005739;GO:0050897;GO:0008270;GO:001687	BP:leucine catabolic process;CC:methylcrotonoyl-CoA carboxylase complex;CC:mitochondrion;MF:cobalt ion binding;MF:zinc ion binding;MF:ligase activity;	K01969	E6.4.1.4B	map00280	Valine, leucine and isoleucine degradation	COG4799	I:Lipid transport and metabolism	XP_034599711.1	methylcrotonoyl-CoA carboxylase beta chain, mitochondrial [Setaria viridis]	sp|Q9LDD8|MCCB_ARATH;	Methylcrotonoyl-CoA carboxylase beta chain, mitochondrial OS=Arabidopsis thaliana OX=3702 GN=MCCB PE=2 SV=1;	PF01039.23	Carboxyl_trans	Carboxyl transferase domain
gene.CpB0103374.1	0.713333	1.15	24.0067	16.69	0.443333	50.6167	GO:0005975;GO:0046658;GO:0042972;GO:000455	BP:carbohydrate metabolic process;CC:anchored component of plasma membrane;MF:licheninase activity;MF:hydrolase activity, hydrolyzing O-glycosyl compounds;	------	------	------	------	ENOG410YAHP;ENOG410YDQN	G:Carbohydrate transport and metabolism;	XP_034585894.1	lichenase-2-like [Setaria viridis]	sp|P12257|GUB2_HORVU;	Lichenase-2;	PF00332.19	Glyco_hydro_17	Glycosyl hydrolases family 17
gene.CpB0104618.1	0.043333	0.4	4.92333	1.74333	0.266667	2.19667	GO:001602	CC:integral component of membrane;	------	------	------	------	ENOG410Z77B	S:Function unknown	XP_004961108.1	predicted GPI-anchored protein 58 [Setaria italica]	------	------	------	------	------
gene.CpB0105196.1	5.05	3.61667	44.4667	47.0433	14.1633	43.9033	GO:0006552;GO:0005739;GO:0003995;GO:0050660;GO:000847	BP:leucine catabolic process;CC:mitochondrion;MF:acyl-CoA dehydrogenase activity;MF:flavin adenine dinucleotide binding;MF:isovaleryl-CoA dehydrogenase activity;	K00253	IVD, ivd	map00280	Valine, leucine and isoleucine degradation	ENOG410XNMY	I:Lipid transport and metabolism	CAB3460070.1	unnamed protein product [Digitaria exilis]	sp|Q75IM9|IVD_ORYSJ;	Isovaleryl-CoA dehydrogenase, mitochondrial OS=Oryza sativa subsp. japonica OX=39947 GN=Os05g0125500 PE=2 SV=2;	PF00441.25;PF02771.17;PF02770.20;PF08028.12;PF11794.9	Acyl-CoA_dh_1;Acyl-CoA_dh_N;Acyl-CoA_dh_M;Acyl-CoA_dh_2;HpaB_N	Acyl-CoA dehydrogenase, C-terminal domain;Acyl-CoA dehydrogenase, N-terminal domain;Acyl-CoA dehydrogenase, middle domain;Acyl-CoA dehydrogenase, C-terminal domain;4-hydroxyphenylacetate 3-hydroxylase N terminal
gene.CpB0105488.1	1.59667	1.12667	7.87	4.4	2.15333	3.85	GO:0048544;GO:0016021;GO:0004674;GO:000552	BP:recognition of pollen;CC:integral component of membrane;MF:protein serine/threonine kinase activity;MF:ATP binding;	------	------	------	------	COG0515	T:Signal transduction mechanisms	XP_034588747.1	putative receptor protein kinase ZmPK1 [Setaria viridis]	sp|P17801|KPRO_MAIZE;	Putative receptor protein kinase ZmPK1 OS=Zea mays OX=4577 GN=PK1 PE=2 SV=2;	PF00069.26;PF07714.18;PF01453.25;PF00954.21;PF08276.12;PF00024.27	Pkinase;PK_Tyr_Ser-Thr;B_lectin;S_locus_glycop;PAN_2;PAN_1	Protein kinase domain;Protein tyrosine and serine/threonine kinase;D-mannose binding lectin;S-locus glycoprotein domain;PAN-like domain;PAN domain
gene.CpB0300495.1	3.86	3.41	15.8333	5.41	5.29	19.76	GO:0009853;GO:0006807;GO:0005739;GO:0047545;GO:0071949;GO:0051990;GO:001649	BP:photorespiration;BP:nitrogen compound metabolic process;CC:mitochondrion;MF:2-hydroxyglutarate dehydrogenase activity;MF:FAD binding;MF:;MF:oxidoreductase activity;	K18204	D2HGDH	------	------	COG0277	K:Transcription	XP_004955699.1	probable D-2-hydroxyglutarate dehydrogenase, mitochondrial [Setaria italica]	sp|Q7XI14|D2HDH_ORYSJ;	Probable D-2-hydroxyglutarate dehydrogenase, mitochondrial OS=Oryza sativa subsp. japonica OX=39947 GN=D2HGDH PE=3 SV=1;	PF02913.20;PF01565.24	FAD-oxidase_C;FAD_binding_4	FAD linked oxidases, C-terminal domain;FAD binding domain
gene.CpB0300719.1	3.25667	2.69	10.9033	5.98667	3.60667	6.98333	GO:0003333;GO:0005789;GO:0016021;GO:0015171;GO:0015175;GO:001517	BP:amino acid transmembrane transport;CC:endoplasmic reticulum membrane;CC:integral component of membrane;MF:amino acid transmembrane transporter activity;MF:neutral amino acid transmembrane transporter activity;MF:aromatic amino acid transmembrane transporter activity;	K14209	SLC36A, PAT	------	------	COG0814	E:Amino acid transport and metabolism	XP_034583253.1	amino acid transporter ANT1 [Setaria viridis]	sp|Q9SF09|ANT1_ARATH;	Amino acid transporter ANT1 OS=Arabidopsis thaliana OX=3702 GN=ANT1 PE=1 SV=1;	PF01490.19	Aa_trans	Transmembrane amino acid transporter protein
gene.CpB0400578.1	0.616667	0.14	6.63667	1.08333	1.50333	2.63	GO:0016491;GO:0005506;GO:0051537;GO:0071949;GO:000905	MF:oxidoreductase activity;MF:iron ion binding;MF:2 iron, 2 sulfur cluster binding;MF:FAD binding;MF:electron carrier activity;	K11817	AAO1_2	map00380	Tryptophan metabolism	COG4630	F:Nucleotide transport and metabolism	XP_034575951.1	indole-3-acetaldehyde oxidase-like [Setaria viridis]	sp|O23888|ALDO2_MAIZE;	Indole-3-acetaldehyde oxidase OS=Zea mays OX=4577 GN=AO2 PE=2 SV=1;	PF02738.19;PF00941.22;PF01799.21;PF03450.18;PF01315.23	Ald_Xan_dh_C2;FAD_binding_5;Fer2_2;CO_deh_flav_C;Ald_Xan_dh_C	Molybdopterin-binding domain of aldehyde dehydrogenase;FAD binding domain in molybdopterin dehydrogenase;[2Fe-2S] binding domain;CO dehydrogenase flavoprotein C-terminal domain;Aldehyde oxidase and xanthine dehydrogenase, a/b hammerhead domain
gene.CpB0401612.1	7.2	8.58667	33.6233	21.52	9.27667	19.33	GO:0009733;GO:0009413;GO:0042538;GO:0009753;GO:0009741;GO:0009816;GO:0006593;GO:0010121;GO:0051646;GO:0009414;GO:0009408;GO:0009737;GO:0055129;GO:0006979;GO:0019544;GO:0005737;GO:0005739;GO:0008270;GO:0030170;GO:0004587;GO:004280	BP:response to auxin;BP:response to flooding;BP:hyperosmotic salinity response;BP:response to jasmonic acid;BP:response to brassinosteroid;BP:defense response to bacterium, incompatible interaction;BP:ornithine catabolic process;BP:arginine catabolic process to proline via ornithine;BP:mitochondrion localization;BP:response to water deprivation;BP:response to heat;BP:response to abscisic acid;BP:…	K00819	rocD, OAT	map00330	Arginine and proline metabolism	COG4992	E:Amino acid transport and metabolism	XP_034576397.1	ornithine aminotransferase, mitochondrial [Setaria viridis]	sp|Q10G56|OAT_ORYSJ;	Ornithine aminotransferase, mitochondrial OS=Oryza sativa subsp. japonica OX=39947 GN=OAT PE=2 SV=1;	PF00202.22	Aminotran_3	Aminotransferase class-III
gene.CpB0401957.1	5.04	4.48667	27.1633	14.8233	10.52	12.09	GO:0022904;GO:0031305;GO:0004174;GO:0051539;GO:0043783;GO:0048039;GO:0046872;GO:000905	BP:respiratory electron transport chain;CC:integral component of mitochondrial inner membrane;MF:electron-transferring-flavoprotein dehydrogenase activity;MF:4 iron, 4 sulfur cluster binding;MF:oxidoreductase activity, oxidizing metal ions with flavin as acceptor;MF:ubiquinone binding;MF:metal ion binding;MF:electron carrier activity;	K00311	ETFDH	------	------	COG0644	C:Energy production and conversion	XP_004982609.1	electron transfer flavoprotein-ubiquinone oxidoreductase, mitochondrial isoform X1 [Setaria italica]	sp|Q337B8|ETFQO_ORYSJ;	Electron transfer flavoprotein-ubiquinone oxidoreductase, mitochondrial OS=Oryza sativa subsp. japonica OX=39947 GN=Os10g0516300 PE=3 SV=1;	PF05187.14;PF00890.25;PF13450.7;PF01266.25;PF01946.18;PF07992.15;PF03486.15;PF05834.13;PF13738.7;PF12831.8;PF13454.7	ETF_QO;FAD_binding_2;NAD_binding_8;DAO;Thi4;Pyr_redox_2;HI0933_like;Lycopene_cycl;Pyr_redox_3;FAD_oxidored;NAD_binding_9	Electron transfer flavoprotein-ubiquinone oxidoreductase, 4Fe-4S;FAD binding domain;NA;FAD dependent oxidoreductase;Thi4 family;Pyridine nucleotide-disulphide oxidoreductase;HI0933-like protein;Lycopene cyclase protein;Pyridine nucleotide-disulphide oxidoreductase;FAD dependent oxidoreductase;FAD-NA
gene.CpB0500657.1	2.04667	2.60667	32.5067	10.31	6.12333	16.1233	GO:0046686;GO:0005739;GO:0005774;GO:0008483;GO:0030170;GO:000827	BP:response to cadmium ion;CC:mitochondrion;CC:vacuolar membrane;MF:transaminase activity;MF:pyridoxal phosphate binding;MF:zinc ion binding;	K00827	AGXT2	map00270;map00250;map00280;map00260	Cysteine and methionine metabolism;Alanine, aspartate and glutamate metabolism;Valine, leucine and isoleucine degradation;Glycine, serine and threonine metabolism	COG0160	E:Amino acid transport and metabolism	XP_034571187.1	alanine--glyoxylate aminotransferase 2 homolog 1, mitochondrial [Setaria viridis]	sp|Q940M2|AGT21_ARATH;	Alanine--glyoxylate aminotransferase 2 homolog 1, mitochondrial OS=Arabidopsis thaliana OX=3702 GN=AGT2 PE=1 SV=1;	PF00202.22	Aminotran_3	Aminotransferase class-III
gene.CpB0501993.1	1.63333	2.05333	10.2767	5.53	3.40667	7.66	GO:0009793;GO:0051781;GO:000577	BP:embryo development ending in seed dormancy;BP:positive regulation of cell division;CC:vacuole;	K01205	NAGLU	map00531	Glycosaminoglycan degradation	ENOG410XNMK	U:Intracellular trafficking, secretion, and vesicular transport	XP_034575353.1	alpha-N-acetylglucosaminidase [Setaria viridis]	sp|Q9FNA3|NAGLU_ARATH;	Alpha-N-acetylglucosaminidase OS=Arabidopsis thaliana OX=3702 GN=NAGLU PE=2 SV=1;	PF05089.13;PF12972.8;PF12971.8	NAGLU;NAGLU_C;NAGLU_N	Alpha-N-acetylglucosaminidase;Alpha-N-acetylglucosaminidase;Alpha-N-acetylglucosaminidase
gene.CpB0600613.1	7.39	6.58333	52.2233	32.9833	24.79	28.3733	GO:0006572;GO:0009072;GO:0005829;GO:0005634;GO:0003868;GO:0003677;GO:0046872;GO:004280	BP:tyrosine catabolic process;BP:aromatic amino acid family metabolic process;CC:cytosol;CC:nucleus;MF:4-hydroxyphenylpyruvate dioxygenase activity;MF:DNA binding;MF:metal ion binding;MF:identical protein binding;	K00457	HPD, hppD	map00130;map00360;map00350	Ubiquinone and other terpenoid-quinone biosynthesis;Phenylalanine metabolism;Tyrosine metabolism	COG3185	E:Amino acid transport and metabolism	XP_004951787.1	4-hydroxyphenylpyruvate dioxygenase [Setaria italica]	sp|O48604|HPPD_HORVU;	4-hydroxyphenylpyruvate dioxygenase OS=Hordeum vulgare OX=4513 PE=2 SV=1;	PF00903.26;PF13669.7;PF14696.7	Glyoxalase;Glyoxalase_4;Glyoxalase_5	Glyoxalase/Bleomycin resistance protein/Dioxygenase superfamily;Glyoxalase/Bleomycin resistance protein/Dioxygenase superfamily;Hydroxyphenylpyruvate dioxygenase, HPPD, N-terminal
gene.CpB0601632.1	0.626667	0.8	4.39667	2.46	0.896667	2.13333	GO:001602	CC:integral component of membrane;	------	------	------	------	ENOG410YG9B	S:Function unknown	CAB3446961.1	unnamed protein product [Digitaria exilis]	------	------	PF12056.9	DUF3537	Protein of unknown function
gene.CpB0701127.1	1.14667	1.80333	6.26	4.45667	1.66333	5.61667	GO:0030154;GO:0006355;GO:0005634;GO:0043565;GO:000827	BP:cell differentiation;BP:regulation of transcription, DNA-templated;CC:nucleus;MF:sequence-specific DNA binding;MF:zinc ion binding;	------	------	------	------	COG5641	U:Intracellular trafficking, secretion, and vesicular transport	XP_004976389.1	GATA transcription factor 6 [Setaria italica]	sp|Q9FH57|GATA5_ARATH;	GATA transcription factor 5 OS=Arabidopsis thaliana OX=3702 GN=GATA5 PE=2 SV=1;	PF00320.28	GATA	GATA zinc finger
