# Supplementary material for: Combined analyses of transcriptome and metabolome reveal the mechanism of exogenous strigolactone regulating the response of elephant grass to drought stress
Source: Front Plant Sci. 2023 May 8;14:1186718. doi: 10.3389/fpls.2023.1186718 (PMC10200884; doi:10.3389/fpls.2023.1186718)
Supplement: Supplementary File 8 — The key 44 genes. [file DataSheet_8.xlsx]

## Sheet: Sheet1
gene.CpA0203312.1
gene.CpB0103652.1
gene.CpA0100504.1
gene.CpA0301066.1
gene.CpA0600615.1
gene.CpA0103469.1
gene.CpB0204000.1
gene.CpB0203332.1
gene.CpB0105721.1
gene.CpB0104060.1
gene.CpA0105385.1
gene.CpA0504993.1
gene.CpA0504761.1
gene.CpB0205060.1
gene.CpA0503348.1
gene.CpA0700959.1
gene.CpA0301051.1
gene.CpB0204954.1
gene.CpB0700538.1
gene.CpA0101446.1
gene.CpB0205081.1
gene.CpB0700954.1
gene.CpA0202265.1
gene.CpA0202256.1
gene.CpA0201611.1
gene.CpA0201626.1
gene.CpA0403417.1
gene.CpB0103289.1
gene.CpB0103297.1
gene.CpA0102576.1
gene.CpB0301112.1
gene.CpA0703361.1
gene.CpB0201645.1
gene.CpA0203545.1
gene.CpA0702908.1
gene.CpA0104511.1
gene.Cp0000455.1
gene.CpA0303976.1
gene.CpB0105196.1
gene.CpB0500657.1
gene.CpA0102214.1
gene.CpB0400578.1
gene.CpB0102025.1
gene.CpA0104386.1
